# Supplementary material for: Integrative Protein-Based Prognostic Model for Early-Stage Endometrioid Endometrial Cancer
Source: Oxford University Press journal article supplement (doi:10.1158/1078-0432.ccr-15-0104), 2015-07-29
Supplement: 10780432ccr150104-sup-143915_2_supp_3067805_nrwpst.xlsx [file 10780432ccr150104-sup-143915_2_supp_3067805_nrwpst.xlsx]

## Sheet: Training
ID	OS	Status (alive=0,dead=1)	Age	Grade	Stage	14.3.3_epsilon	4E.BP1	4E.BP1_pS65	4E.BP1_pT37T46	53BP1	ACC_pS79	ACC1	Akt	Akt_pS473	Akt_pT308	AMPK_alpha	AMPK_pT172	AR	ASNS	ATM	Bak	Bax	Bcl.2	Bcl.xL	Beclin	beta.Catenin	Bid	Bim	c.Jun_pS73	c.Kit	c.Met_pY1235	c.Myc	C.Raf	C.Raf_pS338	Caspase.7_cleavedD198	Caveolin.1	CD31	CD49b	CDK1	Chk1	Chk1_pS345	Chk2	Chk2_pT68	cIAP	Claudin.7	Collagen_VI	Cyclin_B1	Cyclin_D1	Cyclin_E1
Bergen1	60	0	77	2	1	0.130428	-0.249884	0.725601	0.103391	0.638608	0.303703	-0.406966	0.135709	2.59138	1.88954	1.22361	0.0840246	-0.49907	0.681365	0.453861	-0.500025	0.692703	0.432282	0.919461	0.0136251	1.35885	0.133744	-0.0465467	-0.163585	-0.019881	-0.485762	-0.907977	-0.263095	-0.0963609	0.567085	-1.18598	-0.348019	0.530686	-0.0444153	-0.281008	0.47087	0.263858	0.0242985	-0.00119201	0.158359	-0.593767	-0.814605	0.28313	-0.858742
Bergen2	60	0	46	1	1	-0.0780568	-0.620506	0.00438098	-0.464016	0.651852	-0.130736	-0.786015	0.163418	2.00302	1.59807	0.39385	0.364224	-0.17812	0.335729	-0.324338	-0.0580387	0.143177	0.443934	-0.0406529	-0.256208	1.90436	-0.258032	-0.177905	-0.541647	-0.225544	-0.344703	-0.552449	-0.270106	-0.396797	1.43842	1.88524	0.108239	-0.314255	-0.163969	-0.182114	0.195369	0.010654	-0.508382	-0.0404931	1.12874	-0.825357	-0.298762	-0.0888615	0.863461
Bergen3	60	0	80	3	1	-0.0860946	0.557411	-0.00989253	0.203846	0.537991	0.193877	-0.50577	0.0228779	2.94681	2.43306	-0.197845	0.121445	0.0330737	0.284108	-1.24367	-0.579475	-0.702689	-0.274477	0.464141	-0.137865	1.01629	-0.194296	-0.181123	0.104887	-0.595569	-0.38514	-0.112321	-0.169886	-0.101611	1.22579	-0.314687	-0.0917059	0.542112	0.0945596	-0.0209887	0.13315	-0.0103267	-0.35277	-0.110779	1.19203	-0.738525	0.411999	-0.0843381	0.119262
Bergen4	60	0	57	1	1	0.244692	-0.115773	-0.235663	-0.799747	0.89941	0.173593	-0.128193	0.132565	-0.075158	-0.399854	0.717865	1.17494	0.111744	-0.215429	1.03527	0.0569358	0.616516	-0.319182	0.377389	0.0286888	1.01101	0.0318312	-0.0437501	0.0305896	-0.321693	-0.0610388	-0.180781	-0.0120553	-0.280407	-0.123083	0.436507	0.0842155	0.0306153	0.602007	0.0607421	0.386425	0.815494	0.186274	0.261395	0.776213	-0.242044	0.570201	-0.472561	1.44954
Bergen5	60	0	66	2	1	-0.134442	-0.618917	0.94599	0.19008	0.717995	0.0463497	-0.474088	0.503787	2.50417	1.88255	0.594739	0.472369	0.594007	-0.47206	-0.402457	-0.69636	1.1804	0.854365	0.714208	-0.332427	1.52756	-0.0146121	0.105521	-0.318943	-0.500688	-0.512585	1.38981	-0.77937	-0.175909	-0.349621	2.0201	-0.274003	-0.378489	0.770667	-0.201459	0.410392	0.390443	-0.242645	-0.12677	0.704484	-0.0776523	-0.428533	0.216648	1.11132
Bergen6	60	0	46	1	1	-0.19249	-0.991836	2.63386	-0.188108	0.0572683	-0.317367	-0.991325	0.600064	2.43282	1.78297	0.495466	0.365379	0.911625	-0.774967	-0.4697	-0.667537	-0.395526	0.352617	-0.0949175	-0.0223432	0.771552	0.00902336	-0.443753	0.432589	0.395126	-0.37162	0.722428	-0.284136	-0.339434	-0.819343	3.19286	-0.107429	-0.479243	0.0270737	-0.285598	0.456616	-0.209583	-0.0797695	-0.134734	-0.48599	0.645377	-0.920831	0.738194	-0.0265019
Bergen7	57	0	78	1	1	0.146581	-0.831034	0.108101	-0.525286	-0.369647	-0.442201	-0.766918	0.277847	2.2468	1.32566	0.160765	0.212819	-0.0779634	-0.535917	-0.0843533	-0.387659	-0.0414216	0.46185	0.132021	0.193186	1.18761	0.223244	-0.123088	-0.195264	-0.09989	-0.212651	-0.445155	-0.274486	0.00389868	0.262464	2.02039	0.134759	-0.172603	-0.143345	-0.136698	-0.117923	0.456595	-0.0805379	0.119538	0.369418	0.18844	0.319568	0.695554	1.17072
Bergen8	60	0	90	2	1	0.155647	-0.122275	-0.0138125	-0.120547	0.389436	0.311678	0.124643	0.246731	1.41575	1.25019	0.164797	0.566844	0.00606826	-0.0742843	0.310708	-0.599023	0.908947	1.06323	-0.00997588	-0.0661408	-0.828358	-0.102518	0.043967	-0.354807	-0.0362306	-0.377585	-0.799806	-0.227246	-0.129013	1.68466	-0.363536	-0.0332403	0.889399	0.0771211	0.12285	0.030953	0.582238	-0.126639	0.0939909	1.24834	-0.478772	0.566159	-0.323819	0.364821
Bergen9	60	0	81	1	1	-0.146895	-0.843198	0.697886	-0.160011	0.778465	-0.0443801	-0.60579	0.249707	1.64956	1.22337	0.273624	0.32369	1.12856	-0.169786	0.480068	-0.693245	0.00938704	0.251795	0.183141	-0.0579925	1.44459	0.0261394	-0.142189	0.326613	-0.322565	-0.366409	-0.35303	-0.251046	-0.052622	-0.730737	1.78604	-0.300748	0.329015	0.263736	-0.232827	0.160804	0.585368	-0.27746	-0.103613	0.651539	-0.180143	-1.30661	0.156202	0.605439
Bergen11	25	1	46	3	1	0.0211546	-0.403827	0.483202	0.0402333	-0.787775	-0.243172	-0.575765	0.28427	1.40442	1.45232	0.36943	-0.050571	-0.0726594	-0.202991	-0.937807	-0.150936	1.08844	0.908391	0.208232	-0.17579	0.65966	0.363916	0.239718	-0.335878	0.457844	-0.179296	0.756153	-0.770319	0.00558599	1.45378	2.78305	0.353264	-0.446871	0.166873	-0.246432	0.213315	0.295089	0.0150069	-0.272543	-0.172013	0.119659	-0.82848	0.875194	-0.180545
Bergen12	60	0	65	1	1	0.351446	0.385593	-0.426444	-0.890625	-0.924743	-0.790855	-1.41492	-0.49224	0.8215	0.00510384	0.263209	0.431474	-0.617175	-0.861646	-1.01334	-0.111752	1.22778	-0.792709	0.214681	0.186196	1.49701	0.102298	-0.552788	-0.240982	-0.415997	-0.210695	0.566397	-0.379407	-0.140936	1.12267	-0.644067	0.273181	0.828999	0.120236	-0.0422123	0.208618	0.148839	-0.172092	0.305787	0.75083	0.100679	0.418008	0.209951	0.678212
Bergen13	60	0	75	2	1	-0.110501	-0.862681	2.21927	-0.203444	0.119918	-1.3326	-2.2174	0.275	0.51405	0.298994	0.013645	0.0291276	1.27157	-1.00364	0.12193	-0.489981	-0.690755	1.54379	0.159731	-0.185112	1.14307	0.146574	0.265127	0.435395	0.147854	-0.353649	0.094299	-0.541044	-0.0829695	-0.768327	2.67651	-0.0657059	0.461368	-0.308003	-0.38092	1.00491	-0.348954	-0.284228	-0.469445	-0.622645	0.349833	-2.48735	0.96966	-0.992089
Bergen14	60	0	57	1	1	0.132007	-0.83519	-0.472929	-0.0832226	0.389345	0.0992486	-0.730036	-0.303447	3.40684	2.63541	1.15679	0.880273	-0.10477	-0.657914	-0.818689	-0.316818	0.399071	-0.7591	0.841863	-0.439644	2.4276	0.18265	-0.151783	-0.230064	-0.524161	-0.464044	-0.649175	-0.482747	-0.27584	-0.394408	-0.513575	-0.627109	-0.29415	-0.0194066	-0.277298	0.706834	0.58804	-0.320377	-0.109749	0.410998	0.13823	-0.506143	0.559874	1.39364
Bergen15	60	0	65	1	1	0.260402	-0.766462	-0.0911187	-0.81448	-0.0666752	-0.228768	-0.883627	0.181278	0.535365	0.376792	0.428467	0.751573	0.489538	-0.459574	0.324552	-0.381545	0.745342	0.465425	1.0234	-0.163081	2.41673	0.299332	0.264676	-0.251554	0.425208	-0.344017	0.835837	-0.375014	-0.136179	1.56947	-0.345374	-0.175198	0.405124	0.146892	-0.217845	0.280064	0.408834	-0.1509	-0.00250371	-0.338407	-0.254409	-0.784349	0.141283	-0.583248
Bergen16	35	1	78	1	1	0.0183118	-0.379178	0.000828964	-0.199035	0.113623	-0.776693	-1.73792	-0.446693	1.69152	1.37495	0.543846	0.368435	-0.373357	-0.281822	-0.0691341	-0.66374	-0.0578645	0.937036	0.335277	-0.0669293	1.65667	-0.147028	0.354878	-0.257656	0.169587	-0.398725	-0.555214	-0.52845	-0.337371	-0.880216	1.5927	0.230206	0.190366	0.0330306	-0.336489	0.276445	0.156863	0.518905	-0.443621	0.25	-0.0101014	-1.89607	0.536811	-0.711661
Bergen18	52	0	88	3	1	0.359175	-0.111995	0.399986	0.482972	-0.350027	-0.0562942	-0.345046	-0.204481	2.33485	2.08861	0.101442	0.0593027	0.0452243	1.38141	-0.702291	-0.651912	1.11256	-0.256353	1.21611	0.0545321	1.07376	0.298478	-0.27089	-0.954867	-0.574237	-0.336161	-0.392338	-0.839002	-0.126322	1.11842	-0.945524	-0.382028	-0.625	0.491695	-0.111301	0.227454	1.48406	1.42825	0.160405	1.6281	-0.458495	0.298801	0.486524	1.97371
Bergen19	60	0	40	2	1	0.00692433	-0.806118	-0.107994	-0.390118	-0.884584	-0.980802	-1.75399	-0.32865	1.34466	0.927607	-0.570627	-0.292017	-0.315096	0.179002	-0.664198	-0.505823	-0.0895912	-0.6309	0.142858	-0.0147002	0.102587	0.76631	-0.486248	-0.00211482	-0.190317	-0.0156394	1.57868	-0.565892	0.315279	0.842235	-0.786247	0.428881	0.274237	-0.124695	-0.105035	0.0824245	-0.108307	0.630974	-0.489481	0.238724	0.00417538	-0.270474	2.32544	0.156566
Bergen20	60	0	58	2	1	-0.272841	-0.621489	0.22431	-0.727838	0.54188	-0.355521	-1.05763	0.245665	1.08942	1.00705	0.236455	0.525995	0.509347	-0.562249	0.191722	-0.571514	0.25087	0.473614	0.090619	-0.0385345	1.58675	-0.298791	-0.0726695	0.0793732	0.0672736	-0.398609	0.798322	-0.396596	-0.267664	1.06904	1.06912	0.0294651	-0.485879	-0.128606	-0.178731	0.207855	-0.00288396	-0.351653	-0.344208	0.153419	-0.360037	-0.151926	0.412321	0.491877
Bergen21	58	0	55	2	1	0.0582997	0.07843	0.172847	-0.213628	0.684188	0.20406	0.264926	0.328128	1.29873	1.03882	0.58511	0.542479	-0.120648	-0.40221	-0.431501	-0.14612	0.0170111	-0.137203	0.644603	0.0568199	1.91816	0.247657	-0.194004	-0.607365	-0.451629	-0.278245	-1.16768	-0.0339515	-0.232909	0.838764	0.454082	-0.38348	0.469274	0.226622	0.0318553	0.0466729	-0.0312452	-0.28778	-0.345767	0.707949	-0.442761	0.159058	0.492911	0.694101
Bergen22	60	0	71	2	1	-0.136269	-0.983743	1.00418	-0.0752822	0.216112	-0.868948	-1.08863	0.0529617	-0.00801737	-0.137872	-0.338559	0.0349347	0.284992	-0.639991	0.110149	-0.140311	-0.129581	0.598508	-0.435042	-0.156855	0.334989	-0.167192	-0.52347	0.582736	-0.0375678	-0.165083	0.626336	-0.187789	0.01747	0.534131	1.51937	0.145229	-0.553973	-0.174704	0.0116747	0.376493	-0.171375	0.0919655	-0.449092	-0.191155	-0.393945	0.399013	0.135072	0.220103
Bergen23	21	1	74	3	1	0.241868	-0.961559	0.324938	0.108311	1.0016	0.0793235	-0.606364	0.0141915	3.489	2.75266	0.530474	0.477907	0.0469152	-0.420993	-0.849199	-0.28879	0.723178	1.03354	0.281977	-0.417401	2.03708	0.0967562	0.361165	0.0510051	-0.503763	-0.23951	-0.915176	0.252197	-0.0453865	-0.139274	-0.269984	-0.635727	-0.542189	-0.304648	-0.206913	0.187745	0.472049	-0.321286	-0.211482	2.03602	-0.698756	-0.000662992	0.358522	2.63755
Bergen24	54	0	54	2	1	-0.0719704	-0.116007	0.268354	-0.296072	0.5834	-0.282977	-0.824121	0.231839	2.56751	1.91496	-0.210734	0.407131	-0.233282	0.443271	-0.137871	-0.422231	0.719468	0.341321	0.17247	-0.294574	2.20585	0.0265707	-0.0166322	0.477984	1.26549	-0.420415	0.247127	-0.0766578	-0.157544	0.412479	0.352704	-0.110507	0.857815	-0.138924	0.0864042	0.0592582	0.499249	0.521364	0.390561	1.02654	-0.664412	1.23477	0.254101	-0.0208371
Bergen25	55	1	80	2	1	0.056834	-0.373562	0.798002	0.0804648	-0.0118209	0.323666	-0.372579	0.397599	3.24082	2.24452	0.999807	1.56377	0.525212	0.586393	0.134298	-0.526377	1.4884	0.0234507	0.812514	-0.0668788	1.84324	0.1625	-0.205811	-0.207903	-0.466808	-0.478941	-1.11837	-0.354115	-0.176738	-0.588335	1.72223	-0.296368	-0.851996	0.0231398	-0.25924	0.460082	0.300115	-0.24173	-0.186775	0.563076	0.0668427	-0.591598	0.947136	0.708309
Bergen26	60	0	83	2	2	0.289224	0.151225	-0.382447	-0.630227	-1.64002	-0.0988546	0.263727	0.0893234	2.19836	1.86538	0.0492952	0.522155	-0.560826	0.332611	-1.00595	-0.377395	0.768064	0.375028	0.0388974	0.239574	-1.37866	0.263957	-0.113304	-0.409504	0.0560514	-0.190434	0.790125	-0.944455	0.166882	1.10337	1.2749	0.933724	0.362475	0.259327	-0.202491	-0.229194	0.312447	-0.0584879	0.12461	1.15709	0.633501	0.41816	0.598884	0.752671
Bergen27	60	0	56	2	1	-0.116815	-0.401893	0.53096	-0.379613	0.178571	-0.812695	-1.50105	-0.0158398	1.27726	0.977946	0.331005	0.807671	0.277079	0.320109	-0.352763	-0.412763	-0.132145	0.990168	-0.0774106	-0.233698	1.32745	-0.0164461	0.226106	-0.0384017	-0.316734	-0.263526	-0.43066	-0.357601	-0.0829254	-0.501891	1.85809	-0.0688741	0.705046	0.27678	-0.162979	0.16935	-0.0421717	-0.0993241	-0.308615	1.4	-0.0410203	-0.583892	0.31034	-0.0628605
Bergen28	60	0	79	3	1	0.319898	-0.836741	-0.303119	-0.560183	-1.51831	-1.53448	-2.34721	-0.851849	-0.895956	-0.4149	0.0110556	-0.494429	0.540845	-0.365666	-3.00136	0.342753	0.581122	0.362439	0.553406	0.194585	-1.24664	0.663524	-0.457871	0.517152	0.639419	0.359224	2.84546	-1.0007	0.265786	-0.00174116	1.51128	0.723513	1.26595	0.556666	-0.301005	0.0684391	0.320489	0.686314	-0.0537209	-0.109583	1.82169	-1.78122	1.05339	0.177959
Bergen29	60	0	79	1	1	-0.0564823	-1.16617	0.645651	-0.368124	0.0279848	0.0818669	-0.480733	0.421711	2.27455	1.82737	0.404359	0.431162	0.479501	-0.198792	0.979578	-0.568889	0.492714	0.457745	-0.104565	0.178022	0.951463	0.0898338	-0.046673	-0.193081	-0.196226	-0.304906	0.677411	-0.365275	-0.245519	-0.596804	2.00337	0.17302	-0.0933786	-0.125955	-0.246138	0.277886	0.431581	0.0159927	-0.0875295	-0.109139	0.00417519	-1.0226	0.626651	0.337467
Bergen30	60	0	59	2	1	-0.0127598	-0.184711	0.652578	-0.147513	-0.215766	-0.208246	-0.389025	0.169514	2.15281	1.75431	0.000929365	0.172199	-0.00356721	0.354091	-0.401108	-0.917926	1.14027	0.456354	-0.0853382	0.181656	0.521977	-0.0369262	-0.456452	-0.430899	0.0444934	-0.267646	1.06985	-0.862962	-0.159985	0.275641	2.45326	0.17751	0.527592	0.0218831	-0.208481	0.106232	0.437813	1.00118	0.157787	1.17957	0.0973807	-0.360524	0.264337	0.641779
Bergen31	60	0	63	2	1	-0.0970822	-0.714744	0.982848	-0.387654	0.438205	-0.399017	-0.797526	0.702452	1.37889	0.943242	0.15921	0.309715	0.599438	-0.751867	0.383669	-0.0646895	0.614249	1.16886	0.286853	-0.117421	0.631418	0.175659	0.215124	0.740074	0.233249	-0.166655	-0.747834	-0.396645	0.0323943	0.334062	2.34945	-0.0306728	-0.355581	-0.0944042	-0.208543	0.244676	0.296046	-0.217656	-0.00661933	-0.346174	-0.352378	-0.498347	0.224912	0.459179
Bergen32	56	0	80	1	1	-0.237656	0.167665	0.341835	0.373922	0.758211	0.515908	-0.112423	0.434609	2.69681	2.04568	0.178162	0.452024	0.933934	-0.0493676	-0.0400226	-0.458136	-0.0267105	-0.0107367	-0.0516155	-0.245503	1.71707	-0.268594	-0.523721	-0.167211	-0.316581	-0.434465	-0.463938	-0.364649	-0.089137	-0.177632	0.511931	-0.442201	0.718028	-0.0463184	-0.0359762	0.726896	0.198606	0.86234	-0.210179	1.09032	-0.557059	-0.165136	-0.133973	0.646869
Bergen33	60	0	68	3	1	-0.148393	-0.802723	-0.397406	0.175974	0.110806	-0.691866	-1.45131	0.709979	-0.247839	-0.309874	-0.280691	-0.115476	0.924562	0.170421	-0.690921	-0.353447	-0.116079	0.60318	0.284724	-0.197234	0.983406	0.0966294	0.683772	-0.0360755	-0.10818	-0.251662	0.465826	-0.524756	-0.107799	-0.297786	0.159459	-0.148381	-0.0235489	-0.235322	-0.164484	0.368662	0.306631	1.27056	-0.201112	0.940646	-0.433753	0.396603	0.707173	1.73296
Bergen34	34	0	44	2	1	-0.0647494	-0.273722	0.975304	0.279892	0.380901	-0.741912	-1.39436	-0.975941	1.09888	0.750244	0.0731902	0.230678	-0.398378	-0.240643	0.370139	-0.112602	0.0294206	0.302096	-0.0284947	0.502173	1.90352	0.549301	0.360438	0.104849	0.553148	0.0553153	1.95031	-0.475272	0.142096	0.622014	-1.77253	-0.208691	0.174196	0.390804	-0.156059	-0.00896246	0.0150571	0.22945	-0.387727	0.484351	-0.348562	-0.754489	1.23733	-0.448533
Bergen35	60	0	59	2	1	0.0276767	-0.484948	0.540046	-0.133705	0.795694	-0.547627	-1.10881	-0.169898	2.07631	1.71841	0.250569	0.207561	0.996089	-0.0366944	0.995788	-0.142169	0.370526	0.808025	0.125241	-0.0790754	0.0404215	0.116195	0.615317	-0.261785	0.600284	-0.20259	-0.958359	-0.29012	-0.130436	-0.31557	1.04706	-0.164763	0.428725	-0.185037	-0.204611	0.185734	0.664609	-0.220406	-0.102793	0.489123	-0.159941	-0.999094	0.0785156	-0.456481
Bergen36	60	0	57	2	1	0.0323124	0.0590373	-0.28795	-0.981876	-0.232965	-0.129864	-0.381861	-0.269501	0.836311	0.528637	0.123877	0.754002	0.163073	0.242018	-0.0343145	0.0302537	0.575049	-0.166238	0.331588	-0.178719	0.88678	0.221961	-0.0684056	-0.302323	-0.00382083	-0.122036	0.620528	-0.451395	-0.146514	-0.0531409	0.0504677	-0.319255	0.429622	0.0829351	-0.0365391	0.308185	0.712159	0.816842	0.136743	0.293418	0.186297	-0.425689	0.151249	0.90109
Bergen37	60	0	65	1	1	-0.242224	-0.660191	1.77132	-0.0163878	0.642644	-0.503491	-1.07123	0.650942	2.19768	1.70173	0.478158	0.193729	0.762147	-0.426752	0.0540514	-0.438325	-0.265908	0.430009	-0.173507	-0.171391	1.48352	-0.193765	-0.587145	0.441604	0.0431602	-0.391234	-0.335874	-0.342505	0.00246278	-0.634901	2.41255	0.0872907	-0.540152	-0.134127	-0.218948	0.523952	-0.319461	-0.370323	-0.18051	0.665846	-0.259635	-0.887866	0.468908	0.101872
Bergen39	60	0	72	2	1	-0.0606275	-0.646264	0.346234	-0.93041	-0.641754	-0.849761	-0.953081	0.0253172	1.55359	1.27544	0.13647	-0.0890607	-0.257863	-0.00872905	-0.771738	-0.523396	1.11325	0.0256267	0.417627	-0.0513791	0.764186	0.758847	-0.24052	-0.755599	0.0865382	-0.170467	0.165298	-0.891718	0.252636	0.85664	1.97154	0.289593	-0.282292	0.129537	-0.334333	-0.0239849	0.0849698	0.292492	-0.00127195	0.542945	0.0962652	-1.5801	1.54679	0.357537
Bergen40	60	0	72	1	1	0.187015	-0.820535	0.35762	-0.707983	-0.297242	-0.222773	-0.581089	0.157749	2.32311	1.9601	0.359602	0.315688	0.266299	-0.0447676	-0.446243	-0.501078	0.935293	0.180773	0.649453	-0.145158	1.03961	0.403161	-0.357902	-0.608748	-0.0666795	-0.175026	0.070686	-0.672688	-0.0336372	2.16139	1.57601	0.0927632	0.383641	0.298603	-0.359012	0.0874555	0.234645	0.0941069	0.23173	1.00233	-0.0523466	-1.30721	0.582009	1.13233
Bergen41	60	0	69	2	1	0.433861	0.104195	0.0325652	-2.39344	-0.744923	0.168678	0.3337	0.000552336	-1.23394	-0.900866	0.751686	1.2896	0.314512	-0.347224	-0.341356	0.0777643	1.57838	0.191463	0.550059	-0.153404	0.237046	0.335491	0.484856	-0.221986	-0.296208	-0.0215385	0.574878	-0.202909	-0.239505	1.56455	-0.506235	0.375046	1.23353	0.595728	-0.0876221	0.0510971	0.841024	0.709777	0.598942	0.228409	0.308066	0.342319	0.00973427	0.567155
Bergen42	58	0	61	1	1	-0.260291	-0.386992	0.536261	0.404225	0.680566	0.345865	-0.276077	0.236467	3.4195	2.7579	0.537971	0.583271	1.07665	-0.275096	0.224335	-0.536017	-0.07896	-0.544481	-0.174056	-0.378042	1.50302	-0.24041	-0.196748	0.0236916	-0.606061	-0.430685	-0.00435855	-0.497623	-0.145442	-0.892578	1.6247	-0.510944	0.0263081	0.12857	0.0471969	0.445054	0.296834	0.337303	-0.0650036	1.36335	-0.62194	0.868921	-0.274257	0.825452
Bergen44	60	0	86	2	1	-0.122891	-0.658773	1.09353	-0.21189	0.253308	-0.246563	-0.731407	0.564714	1.47635	1.02464	0.0798907	0.0598822	0.113743	0.95175	0.139818	-0.504007	0.198909	0.5531	-0.129214	0.0102247	0.965156	-0.0948254	-0.287412	0.141335	-0.260062	-0.32707	0.317105	-0.303106	-0.113405	-0.0496272	2.52363	0.240982	-0.18441	-0.0309044	-0.293541	0.110533	-0.121078	-0.368313	-0.450042	0.0885494	-0.124485	-0.729662	0.782437	0.824257
Bergen45	1	1	78	2	1	-0.114242	-0.385897	0.58003	-0.434429	0.0847281	-0.136431	-0.655593	0.219094	1.26734	0.924485	0.321433	0.483709	0.45715	-0.621553	-0.270865	-0.916982	0.0104519	0.322877	0.218897	0.159733	1.24987	-0.160602	-0.420482	-0.194076	-0.0381886	-0.412731	-0.674929	-0.494203	-0.126383	0.278901	2.13409	0.0860435	0.160671	-0.0381933	-0.282846	0.0863032	-0.27471	-0.372347	-0.146501	0.480237	-0.185441	-1.06833	0.312441	-0.176815
Bergen46	59	1	71	2	1	0.839059	-0.776786	-0.189152	-1.54042	-0.886845	-0.960711	0.466324	0.787884	-0.595552	-0.453256	0.619226	-1.76404	0.185329	0.523825	0.765045	1.47148	0.960842	1.17143	0.788952	0.319659	-1.26641	0.707163	-0.436391	0.18198	-0.0857455	0.562383	0.313984	-0.671956	0.290553	1.17162	-0.681009	1.07557	0.044775	0.748757	-0.0557805	0.262467	1.37519	0.460661	0.286159	-0.509014	0.183709	0.252919	0.501688	1.35938
Bergen47	60	0	58	2	1	0.242592	0.260748	0.0911306	-0.648747	-0.293987	0.140498	0.263762	-0.188597	-0.292407	0.657504	0.323892	0.271154	-0.732064	0.253388	-1.87014	-0.34544	0.709141	-0.414822	0.793743	-0.0542892	1.43831	0.301198	-0.303351	-0.750628	-0.137634	-0.147354	-0.0510881	-0.330468	-0.117406	1.93552	1.00682	0.517868	1.15017	0.13714	0.150563	-0.0848429	0.283438	-0.211384	-0.0336994	1.38434	0.197764	0.879173	0.86855	1.56444
Bergen48	60	0	59	3	2	0.367786	0.130532	-0.293737	0.36772	-2.19523	-0.149438	0.587623	-3.08303	0.402825	1.01144	0.0534737	-0.65044	-0.236827	2.23167	-3.69863	0.457439	1.1265	-0.11465	0.686051	0.964889	-3.04339	0.523564	-0.917907	-0.0692861	0.254597	0.362615	0.956711	-1.53155	0.309519	2.20268	0.258714	1.30881	1.74451	0.414231	-0.214007	-0.0786249	0.578376	0.395959	0.0368061	0.66637	0.847147	0.136325	0.823936	1.11561
Bergen50	60	0	57	2	1	-0.0602562	-0.22457	1.14428	-0.380891	0.524412	-0.0438778	-0.445976	0.33703	1.42613	0.788948	0.283057	0.754303	0.172409	0.20186	-0.172847	-0.481746	-0.0153928	0.538847	0.975434	-0.510465	1.46249	0.106148	0.102358	-0.0837684	-0.486957	-0.524418	-0.835721	-0.22755	-0.178716	0.63999	1.67513	-0.567414	-0.542528	-0.245668	-0.0713953	0.270234	0.728065	0.131653	-0.106531	0.569058	-0.374208	0.461967	0.208059	1.20571
Bergen51	60	0	60	1	1	0.353154	-1.04701	-0.475443	-0.576178	-0.408055	-0.544384	-1.45577	0.162954	0.915913	0.776293	0.653027	0.436984	-0.129818	-0.61033	0.180926	-0.217129	1.36955	0.660295	1.21702	-0.0942803	1.67946	0.340036	-0.658309	-0.389851	-0.300431	-0.233369	0.0137004	-0.656328	-0.195645	1.62428	1.1729	-0.12214	0.609504	0.263132	-0.380417	0.548382	0.0905364	0.240934	-0.153698	-0.562753	-0.222618	-1.93276	0.688918	-0.190674
Bergen52	60	0	61	1	1	-0.0746981	-0.847638	0.747222	-0.388221	0.511358	-1.01754	-1.87431	0.560291	-0.134493	-0.228099	0.396683	0.240762	1.53473	-0.709718	0.757429	-0.0964543	0.0438687	1.55953	0.951564	-0.296897	1.19478	0.346894	-0.153177	0.328581	0.119701	-0.223689	0.0496614	-0.457023	-0.165131	0.558502	1.93024	-0.135795	-0.161943	-0.257219	-0.344783	0.734024	-0.127981	0.628498	-0.564605	-0.289332	-0.707811	-1.52659	0.734019	-0.463472
Bergen53	60	0	69	2	1	0.512402	0.396751	-0.181656	-1.23521	-0.752388	-0.439619	-0.332922	0.177856	0.739706	0.933251	0.376825	1.01834	0.563661	-0.188923	-1.57209	-0.434777	1.96816	0.407774	1.42239	-0.167255	-0.118004	0.0706875	-0.0227513	-0.884058	-0.342356	-0.215991	-0.700163	-0.861939	-0.124577	1.40909	0.935409	0.115201	0.532848	0.91711	-0.16497	0.153969	0.463696	0.309101	0.331492	2.0715	-0.0651579	0.413538	-0.0790379	0.93974
Bergen54	60	0	81	1	1	0.398466	-0.427623	-0.136767	-0.113388	-1.13171	-0.826346	-0.872047	-0.731033	0.649725	0.903384	0.323284	0.0256731	1.09035	-0.0388058	-2.11863	-0.277534	1.56111	1.02773	1.27105	0.0492514	-1.32659	0.223249	-0.362736	-0.261403	0.148091	0.00672466	0.985262	-1.76212	0.0532637	0.480207	2.20983	0.505094	0.393971	0.714333	-0.220909	0.0529739	0.147393	0.199377	0.232168	0.535439	0.673392	-0.796469	0.269381	0.544271
Bergen55	60	0	84	1	1	0.260914	-0.753711	-0.444893	-0.34163	0.395842	0.373812	0.256764	0.214029	1.18366	1.10444	0.326556	0.744447	0.972736	0.482842	0.0831831	-0.461505	1.52859	-1.02697	0.750479	-0.057432	1.497	0.165329	0.307656	-0.764034	-0.775989	-0.358164	-0.869695	0.160943	-0.0336687	-0.506624	-0.355434	-0.534516	-0.159583	-0.340112	-0.0466971	-0.0390958	0.896972	-0.306557	-0.155382	1.12774	-0.422253	1.14278	0.113332	3.37451
Bergen56	60	0	51	2	1	-0.797954	-0.904018	1.4783	-0.434879	0.0501375	-1.25962	-2.05077	0.860104	0.201767	0.123135	0.326183	0.41169	0.722948	-0.921852	-0.181051	0.370602	0.810862	1.95122	1.01531	-0.949088	0.788039	0.358274	0.406554	-0.32736	0.634368	-0.532035	0.92684	-0.625224	-0.0757217	0.521916	3.61427	-0.0592392	-0.201194	0.0202595	-0.252351	0.692581	-0.0555284	-0.314161	-0.557499	-0.957487	1.89716	-1.25012	0.338141	-0.0251301
Bergen57	60	0	73	2	1	0.114453	-0.862021	-0.406551	-0.307362	-0.417533	0.0915178	-0.408394	-0.291238	2.33628	1.59387	-0.094256	0.0596792	0.0534379	-0.600425	-0.207899	-0.425166	0.239845	-0.248157	0.791454	0.017726	1.45754	0.557101	-0.430935	-0.625679	-0.0802709	-0.196398	1.01737	-0.610955	0.0130221	-0.42804	1.01343	0.0481685	0.0792557	0.205892	-0.351298	-0.108351	-0.29339	-0.0181938	-0.233729	0.695098	1.01943	-1.35533	1.08774	-0.361197
Bergen58	60	0	60	1	1	0.309963	0.946358	0.570571	0.863247	-0.430778	-1.56495	-2.37251	-1.35934	-0.0398783	-0.126533	0.201984	0.66783	0.374049	-1.01469	-3.07334	0.804651	2.79488	1.03973	1.01566	-1.1254	0.460932	0.662829	0.642408	0.448509	-0.277704	0.235948	3.21902	-1.10826	0.405692	0.593426	1.50261	-1.28769	1.0448	1.50263	-0.03579	-0.0416143	-0.0803266	0.51892	0.250485	0.951384	2.30481	0.697442	-0.288808	0.421943
Bergen59	40	1	51	2	1	0.307795	-0.318762	0.278844	-0.934997	0.56102	-0.665895	-1.12495	0.84766	-0.656741	-0.427111	0.412704	0.949697	-0.569416	-0.309306	-2.23198	-0.36007	2.07287	1.1622	1.28062	-0.319701	2.3703	0.344545	0.879326	-0.595297	0.169713	-0.316602	-0.10899	-0.31236	-0.175127	2.31191	2.28169	0.251448	-0.264847	0.109655	-0.0424285	0.0248129	0.256574	-0.147363	0.00264801	1.67669	0.0955726	1.3922	1.23938	1.63404
Bergen60	60	0	54	3	1	0.533195	1.99645	-0.878131	-1.8006	0.479055	-1.84842	-1.40684	-0.779013	-1.43116	-1.0691	0.0779506	0.452902	0.405843	0.807419	-0.943047	-0.214469	0.445446	-0.644078	1.19029	-0.0816691	0.727711	0.261784	0.0710056	-0.909855	-0.545026	-0.397813	-0.808094	-0.000307491	-0.310367	2.23172	0.0617084	-0.115	-0.711871	-0.0827532	0.226294	0.262788	0.153427	-0.343088	-0.307762	-1.01337	-0.328557	2.22327	0.801138	-0.25578
Bergen61	60	0	43	1	1	0.316949	-0.596643	-0.473589	-0.576696	-0.298008	-1.25839	-1.91214	0.189964	1.02799	1.16877	0.302974	0.127979	0.374259	0.189391	-1.86992	-0.501985	0.46914	-0.753557	1.33774	-0.299508	0.43494	0.505203	-0.660737	-0.893839	-0.244089	-0.347275	0.366529	-0.803984	0.0832608	2.4185	1.22787	-0.105161	0.161258	0.0581842	-0.10225	0.0293394	-0.0692508	-0.247478	-0.126026	0.88216	-0.241308	-0.428477	1.08403	0.616933
Bergen62	60	0	74	2	1	-0.0896024	0.357119	0.580643	1.06779	0.402716	0.33686	-0.289781	0.224535	2.38845	1.90975	0.624666	0.864918	0.979072	-0.568121	-1.88919	-0.818687	0.983205	-0.199859	1.10264	-0.266104	1.96323	0.0578072	-0.31848	-0.844158	-0.595301	-0.57521	-1.58405	-0.454797	-0.123749	0.684804	1.15419	-0.480701	-0.961485	0.48048	-0.307728	0.342041	0.0852675	-0.661761	-0.176475	1.46121	-0.291686	-0.474833	0.37332	1.27219
Bergen63	46	1	70	2	1	-0.349345	0.830269	-0.829785	-0.204889	-0.607532	0.651134	0.796698	-0.825505	-0.669171	-0.428217	0.854632	1.64977	-0.392748	-0.850594	-2.81603	0.450135	2.49579	0.946972	1.43723	-1.053	-0.971672	0.501225	0.734654	-0.387289	0.348537	-0.139507	1.50446	-1.66191	-0.0260378	1.0112	0.315023	-0.161901	0.871777	1.28557	-0.153886	0.252023	1.56152	2.11485	0.492798	1.07879	1.50435	1.27948	0.4343	2.24873
Bergen65	60	0	61	1	2	0.527365	-0.472988	0.067518	-0.410568	0.648825	-0.973954	-1.72591	0.275554	0.732775	0.902281	0.619356	0.407183	0.164527	-0.784484	0.63809	-0.288729	1.39086	1.64249	1.47937	-0.0704476	-0.0119766	0.363096	0.308023	-0.760032	0.429317	-0.269576	0.309515	-0.391495	-0.275273	0.262244	0.999916	-0.606539	0.229775	-0.0302849	-0.351936	0.334165	-2.40142e-05	0.0650856	0.110491	0.417221	-0.657345	-1.22926	0.464459	-1.29179
Bergen66	60	0	65	1	1	-0.183512	-0.752381	1.72274	-0.280623	0.464572	-1.30761	-2.13798	0.522511	1.09082	0.826552	0.235637	0.0172197	0.832037	-0.775332	-0.383709	-1.40472	-0.107322	1.28721	1.17855	-0.362548	1.61871	-0.34019	-0.439659	-0.111578	-0.0495224	-0.800447	-0.42604	-0.806037	-0.660229	-1.02185	2.48326	-0.199902	0.105294	-0.23394	-0.429502	0.59612	-0.460339	-0.710437	-0.640358	-0.124382	-0.323653	-1.74528	0.554919	-1.19578
Bergen67	60	0	56	1	1	0.572939	-0.778696	-0.160915	-0.487349	0.0872297	-0.261881	-0.335141	-0.00460721	1.68333	1.80636	0.471588	0.74784	-0.082643	1.17819	-0.0176143	-0.495669	1.38866	-0.676242	1.67907	-0.233818	1.49056	0.503659	-0.105574	-1.0596	-0.371645	-0.315092	-0.937323	-0.635394	0.0218307	2.11302	-0.0575739	-0.217827	-0.508242	0.671457	-0.257498	-0.0539011	0.43619	-0.275357	0.0480545	0.824042	-0.142264	-0.794608	0.397726	0.938203
Bergen68	60	0	53	2	1	0.621676	-0.871867	-0.110094	-0.910301	-0.442685	0.152767	0.22271	0.380912	2.33828	2.02	0.8536	1.30056	-1.03286	-0.205049	-2.64167	-0.617449	2.20467	0.135622	1.35445	-0.393703	0.757986	0.259929	-0.462828	-1.07204	-0.0947748	-0.397612	-0.423136	-0.922014	-0.0301869	1.83795	1.11088	-0.160096	1.36235	0.255903	-0.212709	-0.232942	0.234513	-0.120792	0.482073	1.15447	0.247856	-0.00358771	0.652595	2.28579
Bergen69	60	0	49	2	1	-0.080891	-0.940064	0.114858	-0.401383	0.285081	0.0349988	-0.24938	-0.0483691	1.47061	1.15035	-0.0524794	0.0546232	0.389852	-0.156694	0.187307	0.324582	-0.192365	0.396885	-0.104699	-0.275096	0.73996	-0.147725	-0.269511	0.0654668	-0.157506	-0.0259163	-0.226317	-0.28411	-0.111714	1.40871	1.29774	0.125755	-0.301224	-0.0980252	-0.254229	0.126201	-0.256009	-0.162423	-0.42299	0.125024	-0.233725	-1.21524	0.0202404	-0.26831
Bergen71	60	0	70	1	1	0.210086	-0.659489	-0.278201	-0.337346	0.252829	0.123318	-0.546325	-0.134981	2.09917	1.65371	0.25164	0.486543	0.224444	-0.281467	-0.382332	-0.396042	0.882623	-1.15007	1.09905	-0.39549	1.48295	0.558907	-0.636773	-0.636276	-0.602369	-0.326794	-0.169884	-0.419122	0.0216916	-0.257016	-0.54632	-0.921536	-0.608681	-0.00446781	-0.2908	0.412193	0.426719	0.137116	-0.129729	1.11711	-0.681521	-1.07753	0.572132	0.969866
Bergen72	60	0	36	2	1	0.154233	-0.952175	-0.713518	-0.438843	0.240154	0.0200376	-0.632703	-0.157755	2.33453	2.10376	0.809014	0.140682	0.91562	-1.86161	-1.37009	-0.0914297	-0.59765	-0.0235957	0.919794	-0.427215	2.04724	0.0794501	0.184185	-0.672638	-0.752516	-0.356133	-1.21305	-0.636412	-0.0905031	0.525053	0.910687	-1.03294	-1.22718	-0.282581	-0.332225	1.35213	-0.393946	-0.111409	-0.295503	-0.11649	-0.519017	-0.399537	0.45739	-0.121494
Bergen73	60	0	74	1	1	0.172018	-1.45128	-0.30285	-0.795999	-0.256445	-0.234675	-0.94991	-0.0385981	2.18411	1.72715	0.801905	0.536605	-0.214364	-0.48085	-0.689418	-0.167168	0.726517	-0.606456	1.22213	-0.0908684	1.16732	0.483048	-0.438166	-0.183747	-0.536174	-0.156601	1.16236	-0.633814	0.138216	-0.313683	-1.49025	-0.431894	-0.809384	0.364515	-0.244104	0.320997	0.283687	0.0555828	-0.0513462	-0.398278	0.259275	-1.18751	0.934323	0.172846
Bergen74	60	0	59	3	1	-0.0883834	-0.316144	0.556324	-0.609568	-0.353997	0.226859	-0.344688	0.391609	0.158508	-0.00915339	-0.255011	0.105244	0.229456	1.13975	-2.12919	0.0695934	0.350191	0.0849106	0.192411	-0.0347335	0.794045	0.0918572	0.153392	-0.356364	-0.231195	-0.259018	-0.721735	-0.12982	-0.274067	-0.174813	1.10779	0.12868	-0.119294	-0.0453992	-0.151445	0.267999	0.109243	0.171238	-0.418585	0.407984	0.0928389	0.99481	2.20581	0.293815
Bergen75	60	0	64	1	1	0.0434779	-1.22394	1.39699	-0.84735	0.103541	-0.284047	-0.803733	0.269103	0.847967	0.527719	0.780897	0.981056	0.48377	-0.664566	0.0492886	-0.471182	0.272592	0.987555	1.28021	-0.15296	1.66796	0.11864	-0.378321	-0.134054	-0.237475	-0.454917	-1.17875	-0.531395	-0.378144	0.0859284	2.17327	-0.51971	-0.247078	0.119704	-0.471344	0.503	-0.211729	-0.563587	-0.400787	-0.293574	0.136198	-1.83244	0.355418	-0.13961
Bergen76	60	0	70	2	1	0.0870426	-0.599992	-1.15515	-1.66954	-0.349881	0.3117	0.0730016	-0.559602	0.807332	0.529848	1.12224	1.31618	-0.525979	-0.266641	-0.638842	0.633033	2.69397	-0.521632	1.42236	-0.360345	-0.513415	0.638058	-0.253171	-0.706291	-0.160613	-0.104354	1.66591	-0.868113	-0.0304912	-0.139538	-0.0753756	0.248644	0.00674382	0.720282	-0.0894154	0.599063	0.24114	1.64525	0.501601	0.209652	2.07991	-0.15771	0.610814	1.56837
Bergen77	59	0	51	2	1	0.645762	-0.0968564	-0.371963	-1.44065	0.218313	-0.455641	-0.35276	0.41323	-0.490944	-0.589785	0.293719	0.800199	-0.507914	0.121696	-0.166142	-0.162387	1.54483	0.495931	1.80652	-0.150343	0.834796	0.394121	0.0118108	-0.790778	0.234386	-0.25169	-0.525798	-0.349581	-0.337053	1.26911	0.858049	-0.0339979	1.04735	0.207371	-0.0791655	-0.0621367	0.589919	-0.21019	0.321746	0.310447	-0.0877626	0.489032	0.171997	0.252703
Bergen78	60	0	64	2	1	-0.0971368	-1.11698	1.99594	-0.49047	0.752788	-0.617663	-1.39885	0.98883	1.06932	0.850878	1.00033	0.552892	0.254524	-1.20037	-0.610271	-0.620184	1.40998	1.76019	1.04322	-0.532373	2.28388	0.126868	0.102724	0.146627	0.129841	-0.289236	0.486871	-0.796089	-0.329013	-0.598562	2.74714	0.137394	0.68341	0.243465	-0.476394	0.635108	0.161355	-0.215148	-0.0235715	-0.833035	0.719416	-1.70903	1.17986	0.410786
Bergen79	57	0	53	1	1	0.23789	-1.93891	0.390122	-0.656416	-0.59581	0.313137	-0.248306	0.105164	0.860554	0.653375	1.09812	0.759249	-0.829316	0.116864	-0.0724437	0.191061	1.42129	0.339479	1.31469	-0.029543	0.601273	0.43125	0.779369	-0.297088	0.166997	-0.137435	1.31509	-0.340253	0.0166558	1.68377	-0.214071	-0.300644	0.853192	0.279053	-0.328228	0.0554299	0.300845	0.0183519	0.211597	-0.177423	1.86999	-0.371529	-0.0112778	0.748982
Bergen80	59	0	56	2	1	-0.400454	-1.34627	0.17378	-0.528036	0.282662	-0.018164	-0.628272	0.0851071	1.94664	1.38023	0.936846	0.578113	0.17212	-0.822104	0.0936026	-0.835775	1.15849	1.099	1.32063	-0.905402	0.895774	0.127274	-0.364506	-0.0822024	-0.418669	-0.595447	0.782901	-0.748105	-0.111563	0.113533	1.49993	-0.721821	-0.385905	0.392019	-0.274151	0.453999	0.26372	0.143806	0.0348159	-0.633715	1.81291	-1.24942	0.262967	0.111837
Bergen81	59	0	82	1	1	0.213329	-0.932887	-0.00548898	-0.288391	-0.446601	-0.99397	-2.00802	-0.882721	1.34235	0.991014	-0.218388	-0.292567	0.338271	0.115908	-1.31899	0.116339	0.227768	0.241411	0.530635	0.526308	0.419539	0.809029	-0.500514	0.0820124	0.0579879	0.11652	1.41348	-0.598731	0.333244	-0.210253	-0.344911	0.514539	0.108785	0.409382	-0.221123	0.248482	-0.6398	0.507452	-0.491662	0.0533388	0.300724	-1.71216	1.90214	-0.310447
Bergen82	53	1	69	2	1	0.208608	-0.95237	-0.295151	-0.274482	0.808166	-0.528211	-1.11984	0.499559	-1.46905	-0.757838	-0.243469	0.276854	-1.31876	-0.214849	1.15044	0.667243	1.15393	-1.00018	0.888131	-0.444697	2.29617	0.144258	-1.51153	-0.291719	2.22523	-0.203711	-1.34376	0.363165	-0.132607	-0.315115	-1.18768	-1.01168	-0.313664	0.0114185	0.260103	0.694806	0.529238	1.04759	0.152121	-0.801417	-1.34883	0.838758	0.519376	-0.618193
Bergen83	60	0	38	3	1	-0.234031	0.493692	0.781936	0.131749	-1.71568	0.474244	0.248124	0.023667	0.166594	0.205935	1.14572	1.54238	-0.470588	0.678636	-3.66391	0.691129	3.20408	1.70977	1.22913	-1.56726	-0.486218	0.796196	0.731405	-0.305305	0.136283	0.172124	1.98023	-1.37672	0.428306	3.28761	-0.325494	-0.670353	0.728535	1.13601	-0.194169	0.00341598	0.698137	1.02589	0.418587	0.7711	1.69185	1.39983	1.15112	1.49467
Bergen85	60	0	56	1	1	-0.0734772	-0.386517	-0.658737	-0.500396	0.586487	-0.468474	-1.20742	0.469476	0.783956	0.532415	0.356779	0.776679	0.472122	-0.682642	-0.752047	0.209427	1.554	0.0813134	-0.000974914	-0.319142	0.889698	0.24822	-0.87735	0.490267	0.104126	-0.00074184	1.55963	-0.47393	0.0562867	2.32049	-0.831521	-0.12285	0.0644586	0.379854	-0.124501	0.382288	0.148261	0.610221	0.20777	-0.0144191	0.360285	-1.12372	0.0912888	0.0105492
Bergen86	60	0	76	2	1	0.294083	0.494639	0.252073	-1.00466	-0.698368	-0.432932	-0.62501	-0.681292	0.836191	0.322829	0.731596	0.9155	-0.129607	-0.0152769	0.43252	0.34128	0.774411	0.409315	0.464846	0.106626	-0.479572	0.33013	0.649872	0.193014	0.280098	0.0879157	1.81196	-0.327703	-0.0515398	0.190771	-0.988744	0.375535	2.05532	0.0746506	-0.109412	0.0550745	0.421808	0.243256	0.165149	1.06696	0.126189	-0.538874	0.327209	-0.280387
Bergen87	60	0	57	3	1	0.0877923	0.248512	-0.576197	-0.993229	0.46226	0.270512	-0.191473	0.0697231	1.41213	1.17106	-0.277378	0.24122	-0.676238	0.514436	-3.06971	0.184131	-0.548305	-0.920839	0.271672	-0.0903622	1.15011	0.211307	-0.359685	-0.361284	-0.359183	0.0378062	0.165131	-0.0640468	-0.124108	-0.618431	-1.02868	-0.237162	0.530218	0.182097	-0.126574	-0.00197541	-0.565383	-0.161005	-0.112955	0.253608	-0.190847	-0.410764	0.334318	-0.798148
Bergen89	60	0	74	1	1	-0.0734303	-1.09499	0.505032	-0.258465	1.04875	-0.026519	-0.581713	0.144171	1.78669	1.38213	0.808972	0.709627	0.0719331	-0.862724	-0.0991706	-0.18753	0.916159	0.779263	0.319677	-0.496844	1.81223	-0.158852	0.213775	0.145895	-0.31824	-0.22647	0.21557	-0.473299	-0.252347	-1.00745	1.61693	-0.378091	0.00383036	1.18339	-0.332186	0.245038	-0.504172	-0.5041	0.0309857	1.17696	-0.128703	-0.938051	0.0300191	0.115809
Bergen90	60	0	88	2	1	0.0645994	-1.70534	0.650855	0.181987	-0.0172197	-0.276418	-0.624143	0.488335	1.51319	1.24032	0.388224	-0.58772	0.420142	-0.749039	0.13157	0.0121806	0.126572	0.928208	0.0204319	-0.0661408	1.90865	0.0990945	-0.21363	0.147062	-0.0961802	-0.138014	2.04967	-0.536162	-0.290607	-0.394264	2.44722	0.59361	0.464194	-0.022389	-0.294324	-0.0250313	-0.00291968	-0.240277	-0.110836	-0.770095	0.122011	-1.1123	0.888756	-0.877846
Bergen91	55	0	76	3	1	0.489068	-0.0158311	-0.548555	-2.13692	0.814418	-1.29032	-0.278196	0.945626	-1.10738	-0.957468	0.116888	0.0675294	0.510306	1.3994	-1.47143	0.446864	1.06545	0.889403	0.593348	0.0172807	0.437746	0.214517	0.758688	-0.258671	-0.347751	0.124981	-0.49487	-0.0762712	-0.0567548	2.13836	-0.567139	-0.00648674	0.236869	0.207458	0.250275	0.266827	0.873501	0.00411215	0.321695	0.654064	0.389215	0.706072	-0.283731	1.16312
Bergen92	60	0	62	3	1	0.198705	-0.107766	-0.175992	-1.14487	0.857038	-0.248264	-0.692079	-0.0763005	-0.310349	-0.823068	-0.529981	0.424402	0.145679	-0.925623	-0.487722	0.862819	0.303173	1.09565	0.0318074	-0.151968	0.576301	0.163982	0.557482	0.0505782	-0.0991488	0.130868	-0.275689	0.314182	-0.176987	1.50316	-1.22084	0.0318902	-0.0939154	-0.183354	0.216397	0.357103	0.0226752	-0.0826284	-0.0864946	1.14495	-0.174608	1.22579	-0.355076	2.18057
Bergen93	60	0	82	3	1	0.208447	-0.693818	0.00246163	0.184471	-1.72739	-0.157294	0.322434	-1.01826	0.90764	1.30817	0.535148	0.486988	-0.101879	0.224791	-2.10239	0.155892	1.30083	0.478096	0.341273	0.330982	-1.92504	0.50304	-0.636024	-0.140325	0.125147	0.247884	1.21742	-1.52643	0.232994	2.67283	0.862223	0.726921	1.08146	0.481776	-0.279029	0.0286137	0.423483	0.457206	0.0445475	0.426045	1.09257	-0.423849	0.78291	0.589851
Bergen94	60	0	55	1	1	0.0720104	-0.810312	0.267983	-0.182003	0.405444	-0.0650502	-0.33474	-0.121453	2.12445	1.65395	0.521107	0.756867	0.232602	0.262721	0.48973	0.259921	0.755023	-0.154289	0.095723	-0.0154339	0.749755	0.105332	-0.119987	-0.0963276	-0.234687	0.0120707	-0.243616	-0.341777	0.080195	-0.120678	0.772463	-0.000298599	-0.365607	0.177417	-0.220434	0.0438955	-0.154035	-0.0994558	-0.00150373	0.244178	-0.204919	-1.20247	-0.168552	0.978157
Bergen96	59	0	60	1	1	0.131548	-0.393709	-0.1226	-0.283343	0.158664	-0.160598	-0.684197	0.410855	-0.56359	-0.598482	0.478519	0.124177	0.0214056	-0.394425	0.797839	0.494989	0.104597	0.381039	0.162264	0.0149717	0.86878	0.170635	-0.506453	0.0484496	-0.106178	0.106142	0.94933	-0.187972	-0.0451378	1.95021	0.0211986	-0.0339928	-0.172821	-0.0253981	-0.131798	0.155011	0.122564	-0.119188	-0.0524177	-0.38434	0.336883	-0.777367	0.249147	-0.180089
Bergen97	33	1	76	3	1	0.191335	-0.77208	-0.192753	0.0125223	-0.061368	0.699875	0.446601	1.49473	-0.943047	-1.13343	-0.145121	0.414616	-0.37858	0.76031	-0.171431	0.532799	-0.358844	0.0834495	0.71128	-0.157356	0.228182	0.112104	1.2779	1.02346	0.0912915	-0.0262612	0.37753	0.0601824	0.0119261	1.0789	-1.59336	-0.125248	-0.0560472	-0.151788	0.069725	0.209389	0.0800334	-0.0480459	0.358306	-0.10978	-0.114401	1.72796	-0.396686	1.13772
Bergen98	60	0	78	1	1	-0.00243735	-1.53963	-0.146295	-0.858966	-0.0467803	-0.373315	-0.832976	-0.193209	0.831723	0.438778	0.665391	-0.316211	-0.084953	-0.560618	-1.05785	0.255624	0.354543	0.086576	-0.125764	-0.0558202	0.990695	0.0499094	-0.336967	-0.331884	-0.439265	0.029692	0.252835	-0.315061	-0.0574497	-0.146698	-0.178497	-0.213148	-0.625138	0.110899	-0.20023	-0.125977	-0.0867197	-0.213608	0.0231143	-0.69279	0.269293	-0.454659	-0.31542	1.60848
Bergen99	60	0	58	2	1	0.240153	-0.773231	0.0033006	-0.962515	-0.0637454	0.291735	-0.0203505	0.146297	1.60581	0.712608	0.600263	0.865773	0.0539295	0.302815	0.175904	-0.309562	0.732324	0.0787085	0.690996	-0.158748	0.818836	0.180243	-0.10399	-0.399181	-0.18199	-0.0646992	-0.31164	-0.395951	-0.16839	0.928634	0.843084	0.0062349	0.067777	0.631178	-0.175892	0.115988	0.59484	-0.0910229	0.29445	-0.0799318	0.357347	0.0184191	-0.0630907	1.12922
Bergen101	51	0	80	1	1	0.257217	-0.423076	0.503161	-1.10437	-0.110772	-0.432957	-0.778294	0.388088	2.19832	1.68125	0.88452	0.835452	0.240966	0.836522	0.270005	0.14313	0.567038	0.748664	-0.00187629	-0.0453156	0.779239	0.111491	-0.0900476	-0.369945	-0.0540093	-0.0304691	0.0139098	-0.183104	-0.350083	1.7591	1.81229	0.362618	0.379303	0.264905	-0.0986594	-0.0775118	0.105173	-0.182431	-0.110322	1.06639	0.192549	0.611715	0.442758	0.612455
Bergen102	59	0	74	2	1	-0.173124	-1.44653	0.439845	0.315949	0.526558	0.370037	-0.0767559	0.319159	2.00675	1.9116	0.280703	0.438179	0.344129	-0.439004	-0.195898	-0.799202	1.05114	0.636344	-0.109631	-0.360926	1.42812	-0.146792	-0.111582	0.0405433	-0.0698169	-0.491729	0.370321	-0.645704	-0.103733	0.276609	0.514839	-0.23264	-0.268762	0.208284	-0.219832	-0.027691	0.36106	-0.334091	0.0465314	0.155806	0.299151	-0.638557	-0.284257	0.324272
Bergen103	60	0	63	2	1	0.224722	-1.34712	0.157189	-0.285695	-0.0892592	0.135426	-0.0715537	0.133754	1.5387	1.28761	0.193676	0.297651	0.10149	-0.21796	0.82782	0.582574	1.23803	0.0909416	0.398835	-0.0264623	0.100229	0.242696	0.478418	0.125296	-0.0567656	0.0517976	-0.0638442	-0.343649	-0.01151	1.29706	-1.44965	0.0941655	0.673752	-0.0819418	0.0182031	0.162799	0.132338	-0.0448185	0.263958	-0.97219	0.0259647	0.00737843	-0.341931	1.64592
Bergen104	20	1	89	1	1	-0.102471	-0.423894	0.316109	-0.012019	0.543363	-0.140407	-0.55059	-0.0798573	1.39606	1.17042	0.0733018	0.354163	-0.429623	0.258607	-0.00976601	-0.019211	0.0448213	0.204721	-0.0511394	0.022807	1.35493	-0.0922828	-0.266973	0.0352258	-0.175773	-0.180623	-0.546295	-0.504493	-0.201835	-0.352128	0.317279	0.115994	0.548347	0.0012096	-0.0731251	-0.165545	0.238689	-0.317981	-0.0906859	0.542461	-0.378314	0.0120136	0.21675	0.231479
Bergen105	60	0	65	2	1	-0.016984	-0.333592	-0.718977	-0.84882	0.416358	0.587271	0.261364	0.281019	0.763486	0.536898	-0.0118525	0.470773	-0.459581	-0.885949	-1.39785	0.619082	0.395183	0.157981	-0.14236	-0.0857679	1.20128	-0.0443972	-0.141834	-0.276696	-0.515994	-0.0817197	-0.393534	0.111478	-0.229571	1.69354	-0.6013	-0.23606	-0.645123	-0.196137	0.0937046	0.503721	0.479366	0.0395862	-0.0494444	1.4298	-0.237652	1.1766	-0.415802	0.260136
Bergen106	56	0	49	1	1	-0.0042612	-0.802417	-0.596314	-0.331792	0.232414	-0.825064	-1.54437	-0.257597	1.42034	0.657319	0.217365	0.723287	0.884795	-0.431461	0.238309	0.319608	0.091674	0.876888	-0.229221	-0.313207	0.668106	-0.169648	0.199388	-0.158015	-0.472422	-0.029458	-0.456747	-0.550229	-0.169913	0.82016	0.133805	-0.0560702	-0.301664	-0.169963	-0.116795	0.218839	0.412681	-0.0301415	-0.00133398	0.145846	-0.018076	-0.201646	-0.671795	0.57526
Bergen107	58	0	59	2	1	-0.078223	-0.322818	-0.271596	0.423895	-0.000372029	0.507981	-0.0377589	0.0896668	2.75793	2.5138	0.481719	0.272895	0.125713	-0.029553	0.0607804	-0.136145	0.34674	-0.894031	-0.307788	-0.232383	0.953811	-0.0120609	0.29056	-0.128116	-0.733663	-0.207167	3.58555	-0.327856	-0.308032	0.346032	-1.16489	-0.26529	0.260243	0.295939	0.108408	0.232609	0.00368053	-0.313215	-0.196519	0.158618	-0.210872	0.81601	-0.410303	-0.433917
Bergen108	60	0	80	1	1	0.0613874	-0.865191	-0.253536	0.45541	0.207512	-1.64733	-1.30986	-0.149768	1.92118	1.58866	0.412852	-0.376993	-0.23469	-0.423922	0.0786102	0.245515	0.544418	0.982626	0.0304635	-0.261314	1.16766	0.0816025	0.0846001	0.258606	-0.339939	-0.158757	0.393166	-0.386153	-0.120756	0.548551	-0.642861	0.0111987	0.822702	0.41657	-0.111653	-0.0361934	0.19395	-0.214703	-0.342585	-0.151394	-0.17279	-1.06273	-0.222093	-0.306665
Bergen109	60	0	64	2	1	0.0968465	0.132725	1.87232	1.31948	-1.13042	0.420894	0.0495588	-0.103608	0.0605368	0.463061	0.720187	-0.541856	-0.938861	1.29462	-1.47366	-0.338969	1.07019	-0.833367	0.0540436	-0.0685314	-0.159263	-0.18298	-0.799472	-0.39129	-0.617252	-0.296658	-0.544688	-0.555815	0.111105	2.09642	-0.478414	-0.305444	-0.259699	0.390287	0.198826	-0.216111	0.394699	-0.433178	0.318151	0.829398	0.0107882	2.37556	-0.110392	1.22403
Bergen110	60	0	67	2	1	-0.0960092	-1.99478	-0.336663	0.106152	0.366756	-0.271333	-0.99425	0.690671	-0.224714	-0.143712	0.0877223	-0.515162	-0.533083	-1.08498	-0.439708	0.112754	0.111923	-0.51854	0.368102	0.030612	1.16959	-0.226618	0.331049	0.272772	0.0492455	-0.109265	0.2886	-0.734641	-0.243832	-0.642938	-0.588702	-0.0665493	-0.111612	0.161869	-0.142269	-0.0256544	0.292104	-0.222801	-0.0883374	-0.47072	0.21714	0.0573754	0.107109	1.26539
Bergen111	59	0	81	1	1	-0.0128356	-1.24896	-0.506755	-0.573979	0.260278	-0.927433	-1.76536	-0.106135	2.05031	1.87792	0.595185	0.0675387	-0.760253	-0.276038	-0.090128	0.179543	0.767642	0.902986	0.54183	-0.113596	2.46135	0.217514	0.255071	-0.347493	-0.49285	-0.0145636	-0.26511	-0.325015	-0.0115356	-0.101452	-1.34741	-0.290753	0.76611	0.0134947	-0.148992	0.104417	0.659005	-0.287504	0.0713242	-0.11224	-0.211365	-0.588781	0.324067	0.035594
Bergen112	60	0	78	1	1	-0.0673398	-0.859796	-0.365031	-0.267462	0.0294598	-0.33663	-1.22432	0.142238	1.03993	0.945969	0.948164	0.257146	-0.204606	-0.527894	0.589465	0.349155	0.0343774	0.92743	0.162691	-0.160359	1.91433	-0.189592	-0.0238318	0.178758	-0.368792	0.00877414	2.18046	-0.460813	-0.302016	-0.0944046	0.101322	-0.123638	-0.0212483	0.42083	-0.140478	0.414365	0.050322	-0.281555	0.029887	-0.510743	-0.00483531	-1.66277	-0.09118	-0.306058
Bergen113	60	0	67	2	2	0.227027	0.512846	-0.23379	-1.24414	0.565067	-1.04716	-0.553937	0.200313	-1.38799	-0.987464	0.49011	0.339561	0.060751	0.318272	0.290333	0.0978993	1.28239	1.01655	0.211783	-0.0333122	1.53208	0.343035	0.556097	-0.370586	0.529795	-0.0447637	0.278978	0.0172713	-0.278514	0.859018	0.092777	0.15142	0.660493	0.0973225	0.00903115	-0.106462	0.589117	-0.126804	-0.146449	0.152736	-0.0224309	1.06922	0.0820775	1.7176
Bergen115	60	0	54	3	1	-0.0913862	-0.927191	0.858246	-0.339662	0.166569	-0.0809546	-0.623934	0.299208	1.723	1.16235	0.0774107	-0.32902	0.493098	-0.28711	-0.571997	-0.12459	0.398689	0.980598	0.175974	0.0113853	1.21796	0.0809266	-0.381113	0.0850238	0.15996	-0.249875	0.00496006	-0.445706	-0.0544664	1.16425	2.41734	0.236344	0.235509	-0.0999566	-0.167627	0.23159	-0.0698073	-0.22099	-0.199424	-0.815812	0.244004	-0.815428	0.483957	-0.0246882
Bergen116	60	0	50	1	1	0.223222	0.34825	-0.225125	0.497211	0.437457	-1.62979	-3.16736	0.465416	2.96657	2.62155	0.435579	0.423369	0.273641	-0.785693	-5.15251	-0.333082	2.99628	1.30782	0.613828	-0.907878	2.70397	0.509828	0.545606	0.897902	1.3281	-0.03895	1.7755	-1.64617	0.0242313	-0.352491	3.5447	0.481986	0.487788	0.356692	-0.139932	0.29524	0.792833	0.386475	-0.0125259	1.01399	0.809322	-1.08668	0.921696	0.620183
Bergen117	60	0	51	1	1	0.125245	-1.95112	-0.0115568	-0.550867	0.0680733	-0.458622	-1.12549	0.189083	2.53887	1.97802	0.515891	-0.39977	-0.552947	-0.742115	-0.992191	-0.836773	0.152214	-0.783682	0.50571	-0.29748	1.62574	0.204248	-0.709886	-0.0943018	-0.419359	-0.299821	1.19699	-0.546561	0.0118226	-0.179968	-0.299756	-0.505816	0.170743	0.31859	-0.327958	-0.0189018	-0.37675	-0.192949	-0.206672	-0.60376	0.312963	-1.98624	0.764153	0.053983
Bergen118	60	0	61	1	1	0.17301	-1.2135	-0.304585	-0.291389	-0.123511	-0.0699417	-0.526832	-0.0814436	1.43705	1.00801	0.460381	0.00853578	0.0404609	-0.376453	1.33965	0.934991	0.966425	1.20355	0.247389	-0.0770464	-0.0894753	0.358259	0.0734991	-0.15848	-0.251596	0.162151	1.00144	-0.42969	0.0121481	1.30646	-1.11818	0.194066	0.414008	-0.0125985	-0.225448	0.263385	0.152804	-0.0930356	0.156355	-0.920539	-0.11733	-1.35751	0.0334625	-0.316818
Bergen120	39	0	62	1	1	-0.00268079	-0.250234	-0.124346	-0.49851	0.0768234	-0.0124113	-0.299992	-0.0762174	0.914562	0.505698	0.170991	0.871694	0.349222	-0.456133	-0.883966	0.0522539	1.29103	0.204056	0.231613	-0.564309	0.769694	0.411293	0.130423	-0.234847	0.0014602	-0.244402	1.09591	-0.789887	-0.0057413	0.61207	0.0256103	-0.248015	-0.284274	0.171796	-0.0493155	0.204492	0.51241	0.150611	0.186992	-0.0401055	0.757823	0.223234	0.162651	0.832453
Bergen121	60	0	50	2	2	0.19531	-0.478263	-0.494956	-1.04396	0.385979	0.223478	-0.575014	0.432974	0.113794	-0.209499	0.787531	1.31139	-0.0859746	0.41608	-0.00765463	0.478137	1.21641	0.26366	0.49262	-0.0738817	1.92211	0.256101	-0.177825	-0.163382	0.19377	0.0171021	0.203081	-0.0174591	-0.125704	1.53055	0.90494	0.177217	0.0549983	0.597014	-0.189284	0.0667753	0.115282	-0.143327	0.0671259	0.816252	0.036562	-0.722165	-0.0631138	0.0885827
Bergen122	60	0	66	2	1	0.0136277	-0.16468	-0.557733	-0.16115	0.281436	-0.800605	-1.21962	0.295883	0.725893	1.00094	0.26857	0.366808	1.06531	-0.496825	0.099574	0.236379	-0.012168	0.828104	0.0886974	0.126816	1.2204	-0.0875861	-0.0137856	0.0141572	0.130879	0.075381	-0.00293716	-0.0177826	-0.168817	0.582527	0.738727	0.0428655	-0.224527	1.3373	-0.206101	0.00930915	0.316099	0.0462508	-0.39655	0.333202	-0.0777574	-0.601313	0.057633	-0.470167
Bergen124	60	0	65	1	1	0.176102	-0.553022	-0.417771	0.508382	0.129062	0.154438	-0.54455	0.171882	3.08723	2.71819	0.814524	-0.733176	0.408895	-0.505392	-0.395943	-0.495737	0.282109	-0.319769	0.203507	-0.255394	1.93579	0.28927	-0.450089	-0.0774045	-0.506561	-0.175301	0.0672994	-0.334862	-0.226619	-0.0184294	-1.28986	0.582326	-0.702837	0.382016	-0.304754	0.153584	0.0982785	-0.324345	-0.143999	0.84484	0.132567	-1.97986	0.658766	1.13859
Bergen125	60	0	53	2	1	0.00725462	-0.0980595	-0.530787	0.343557	0.142726	-0.37976	-1.03632	-0.404571	1.12898	1.01682	0.20658	0.0867689	-0.987862	0.905715	-1.13951	-0.14235	0.632924	0.163445	0.062323	-0.0180242	1.49166	-0.0274874	-0.447227	-0.0449963	-0.56376	-0.158997	0.197443	-0.314738	-0.0385305	0.281557	-0.75648	-0.0475477	0.636846	-0.167709	0.0755469	0.0123684	-0.479535	-0.201313	-0.119168	-0.189634	-0.144192	0.58541	0.419618	-0.737436
Bergen126	59	0	62	3	1	0.089995	0.92527	-0.309575	-0.137331	-0.414472	0.613091	0.720685	-0.439859	2.13989	1.93065	-0.178058	0.109548	-0.0418378	1.36421	-0.481139	-0.978203	1.15138	-0.696583	-0.026292	-0.161753	-0.105259	0.00399491	0.278986	-0.462154	-0.118644	-0.297692	1.16002	-0.824658	-0.310651	-0.282731	-0.801495	0.0696336	0.369198	0.0333182	0.147103	0.124098	0.605614	0.957488	0.298598	0.980369	0.148918	1.02816	0.129265	1.03486
Bergen127	60	0	59	1	1	-0.177612	-0.580474	0.961002	1.02992	0.384761	0.33122	-0.234778	-0.15958	-0.581149	-0.56832	0.22412	0.0243222	0.509642	-0.300847	-0.379716	-0.345402	0.888299	-1.19642	0.240543	-0.424787	0.840234	-0.306661	0.420535	0.763455	0.216081	-0.214064	0.783269	-0.628317	0.055394	-0.627603	-1.52147	-0.533373	-0.29467	-0.089449	0.056178	0.386805	0.116345	-0.0569624	0.118895	1.16916	-0.000304651	0.247838	-0.0723081	1.10073
Bergen128	48	0	68	1	1	0.384547	-2.04499	-0.39265	-0.340007	-1.14199	1.18119	1.35347	0.801127	3.57867	2.93727	1.26589	0.728232	-0.372059	0.419831	-3.82581	0.820134	3.3417	-0.0888784	1.26464	-0.515076	2.62303	0.343712	-0.323088	-0.239055	-0.122876	0.0230855	0.598645	-0.773799	-0.0670299	-0.653383	0.867568	0.334049	0.268757	0.141605	-0.247724	0.199806	0.571273	0.089916	0.60824	0.233841	0.997752	-1.08872	0.697291	1.3511
Bergen129	60	0	71	1	1	-0.0955036	-0.954188	1.0073	-0.397082	0.495011	-0.537211	-1.16727	0.331044	1.08377	0.852045	0.322121	0.259504	0.89025	-0.667516	-0.184909	0.256655	0.304282	0.581881	0.16247	-0.156101	1.41038	0.0553962	-0.125297	-0.121708	-0.123689	-0.125108	0.190159	-0.414445	-0.0320358	-0.330658	2.24011	0.221228	-0.312253	0.149631	-0.285392	0.372562	-0.292447	-0.15686	-0.140489	-0.228287	-0.0260365	-1.37936	0.034296	0.709737
Bergen130	58	0	76	2	1	-0.198262	-0.515646	0.539221	0.0767933	1.12182	0.362313	0.00913264	0.223096	1.79356	1.48647	0.239708	0.549294	-0.209918	0.0731923	-0.816223	-0.285518	0.739046	0.54122	-0.150897	-0.460799	1.6901	-0.211622	0.443394	0.238188	-0.324881	-0.203673	0.742715	-0.141345	-0.229788	-0.49467	0.835387	-0.08118	0.21156	-0.076659	-0.14417	0.145815	0.123813	-0.451156	0.146235	1.5197	-0.244778	0.183782	0.0727527	0.423879
Bergen132	60	0	61	3	1	0.257648	0.201391	-0.33464	-0.42169	-1.00221	-0.995922	-1.22323	-0.361236	-1.00516	-0.527294	0.0204317	0.43032	-0.297754	0.103295	-1.01106	-0.142146	0.670392	0.148089	0.458121	0.0709383	-0.42939	0.328146	0.158654	-0.241617	0.444427	-0.0942798	0.417545	-1.11469	-0.00182855	0.0350208	0.397129	0.535518	0.470601	0.182917	-0.161768	-0.0988414	0.514438	0.451529	-0.136948	1.04866	0.406831	-0.208749	0.51399	1.07046
Bergen133	12	1	51	1	1	0.0837042	-0.394912	-0.080902	0.12784	0.6235	0.00838596	-0.258943	-0.459597	1.91761	1.88875	0.430111	-0.643895	0.0135397	-0.142935	-0.814617	0.35771	0.50445	0.582169	0.841452	0.509999	2.13708	0.13503	0.0790888	-0.0548562	0.209096	-0.073741	0.764427	-0.322914	-0.100991	-0.0714754	-1.35676	-0.00439193	1.61762	0.0241795	-0.00166654	0.0881819	0.631085	-0.149962	-0.000287656	0.531996	-0.20624	0.12438	0.219832	-0.226896
Bergen134	60	0	50	1	1	-0.0715593	-0.687671	-0.617826	-0.453261	0.515543	0.726172	0.14515	0.50593	2.09672	1.77123	0.557269	0.639897	0.800107	-0.546724	0.368856	0.173058	0.51661	0.810246	-0.207867	-0.148872	1.60294	0.0250291	-0.0191376	0.152258	0.122636	0.064681	0.197406	-0.188085	0.104937	0.75051	1.22108	-0.186787	0.0360606	0.209079	-0.155087	0.186964	0.0652176	-0.179211	0.161107	0.649431	0.0373662	-0.422636	-0.415142	-0.201244
Bergen135	43	0	86	1	1	0.0183969	-1.28768	-0.550667	-0.234039	-0.359849	0.445634	0.0818365	0.151513	2.56216	1.89121	-0.448781	-0.299892	-0.248932	0.34243	1.34919	0.31231	0.459832	0.232877	0.1188	-0.22251	0.946728	0.0511963	0.155563	-0.359562	-0.341378	-0.0159704	-0.491765	-0.477772	0.278374	-0.0497368	-1.42377	-0.100382	0.217615	0.0722134	-0.114486	-0.0939979	0.381686	-0.183222	0.180934	-0.338053	-0.251477	0.058435	-0.351282	0.685966
Bergen136	58	0	73	2	1	0.398436	-1.02319	-0.609315	-0.182533	1.06259	0.267488	-0.315969	0.19906	2.48135	2.07723	0.255979	0.259705	0.536594	-0.206538	-0.0433626	-0.032894	1.23201	0.398146	0.442821	-0.0916248	1.76405	0.193759	-0.14339	-0.248812	-0.31839	-0.101823	-0.448166	0.186208	-0.130929	0.280869	0.0466819	0.375338	0.78992	2.09881	-0.204508	-0.000535401	0.106381	-0.254528	0.0875169	0.708092	-0.0535146	-1.32787	-0.191228	-0.152129
Bergen137	60	0	66	2	1	-0.0742088	-0.389252	-0.292247	0.0332975	-0.129014	1.07825	0.393461	0.296497	1.65639	1.53328	0.445324	0.963802	0.446498	0.0362297	-0.0870656	-0.146574	1.3111	1.00055	0.506414	-0.433887	0.323322	0.00477158	0.23193	-0.125517	-0.154733	-0.211331	-0.444465	-0.675824	-0.134082	0.662158	-0.175461	0.123448	0.704935	0.21616	0.0324973	0.372442	0.727229	-0.0352287	0.294739	-0.736947	0.618575	0.262725	0.000377213	0.0537155
Bergen138	46	1	79	2	2	0.29746	-0.312747	0.22045	-0.155403	1.9716	-0.406889	-0.745086	-0.56819	1.96063	1.42174	0.524507	1.29238	-0.669418	-0.408922	-3.53271	0.0547435	2.25172	1.61226	0.348893	-0.230245	2.9969	0.0646824	1.29506	0.116141	-0.404663	-0.114557	0.244009	-0.807993	-0.349975	-0.0277757	-1.54714	-0.0520252	1.57357	0.232672	-0.0841252	0.0262209	1.24432	-0.0330317	0.0921164	2.18115	0.256731	0.684575	-0.16761	1.01876
Bergen139	60	0	70	1	1	0.186899	0.0876122	-0.0943316	-0.974575	0.421035	0.356232	0.230525	-0.542031	0.789886	0.563866	0.0778626	0.589929	-0.268558	0.763646	-0.500879	-0.0988458	1.28712	0.73053	0.0853983	-0.168199	-1.19749	0.260155	-0.0660229	-0.197852	-0.0405874	-0.121369	0.400656	-0.0919212	-0.0383593	-0.10642	-1.29348	0.931249	0.797702	0.0174146	0.0420049	-0.0881915	0.674449	0.311472	-0.139643	2.2976	-0.115785	0.901594	-0.129591	0.169628
Bergen142	60	0	66	1	1	0.0574228	0.46311	0.578621	0.319339	0.528578	-0.279234	-0.702808	0.0329414	3.06783	2.69864	0.0745668	0.230767	-0.362324	0.112473	-1.75252	-0.611556	0.798702	0.191604	-0.027206	-0.280893	2.45622	-0.0430842	-0.24807	-0.118903	0.0835371	-0.270351	-0.109686	-0.216396	-0.0355238	0.772798	-2.06962	-0.39943	1.1893	0.191479	0.118529	-0.0591487	0.433234	-0.290334	-0.242295	1.6798	-0.0415356	1.96504	0.0599285	-0.377853
Bergen143	60	0	67	1	1	0.157827	-0.908133	-0.456202	-0.388858	0.345002	-0.403302	-0.984274	-0.415109	2.10772	1.76068	-0.0721642	-0.234163	0.246956	-0.115279	0.698341	0.661294	1.02481	1.17769	0.107702	-0.0406509	1.59135	-0.0617726	0.182827	0.349641	-0.467364	-0.0403914	0.812549	-0.339098	-0.0237784	-0.531523	-1.52243	0.343524	0.40904	-0.237638	-0.145909	0.378896	0.44327	0.720182	-0.0492869	-0.159315	-0.266567	-1.32673	-0.295476	0.064065
Bergen145	60	0	61	2	1	0.238701	-0.758749	-0.188829	0.207417	-0.522852	-0.977056	-1.7258	-0.203682	2.23987	1.40184	0.0461343	-0.123082	-0.810892	-0.0911434	-0.494656	-0.0277764	-0.0269925	-0.73842	0.124818	-0.290029	1.5767	0.276763	-0.718298	0.0938911	-0.491097	-0.111838	1.4674	-0.569336	0.028521	-0.369277	-1.44571	0.201071	0.504766	-0.0694979	-0.168507	0.0518003	0.230073	0.0644277	-0.0833679	-0.0825704	0.449544	-0.84862	0.768062	-0.742035
Bergen146	60	0	52	2	2	0.00774417	-0.259247	-0.126948	-0.362328	0.378888	0.0731995	-0.0901938	-0.110683	1.1137	0.936093	0.368036	0.217201	0.19632	-0.537526	-1.29811	0.29191	-0.312787	0.228276	-0.219152	0.0281308	0.946887	-0.085158	-0.0473324	-0.128722	-0.165355	-0.0132416	-0.0380718	-0.243142	-0.233997	0.831144	1.2383	0.167831	-0.0535996	1.03781	-0.153018	0.210963	0.12339	-0.215218	-0.169661	0.587062	-0.024303	-0.430326	0.121455	-0.565712
Bergen147	59	0	70	1	1	0.154876	-1.17066	-0.628384	-0.39874	0.552363	-0.489723	-1.14657	-0.220484	1.81764	1.41877	0.719732	-0.691808	0.681651	-0.185489	-1.1106	-0.338112	0.426376	-0.723074	-0.290322	0.0507452	0.771039	-0.0748835	0.341877	1.10929	-0.154559	-0.170007	2.49289	-0.552925	0.0342677	0.148899	-1.87722	-0.380088	-0.550194	0.166411	-0.0703058	0.330608	-0.330434	-0.233168	0.360596	0.545441	1.40641	-0.118436	-0.0149608	0.23573
Bergen148	60	0	62	2	1	0.2389	-1.64321	-0.105951	-0.761914	-0.0924748	-0.752239	-0.612706	0.0509863	0.427038	0.684465	0.488741	0.860991	0.233737	-0.366791	-1.07049	-0.299008	1.82912	1.3858	0.638672	-0.158713	1.04183	0.387142	0.366669	-0.416587	0.154937	-0.0215187	0.138806	-0.849981	-0.0735565	-0.228799	1.24411	0.643654	0.803253	0.436664	-0.112573	0.0346509	0.732817	0.102582	0.0356883	0.0468295	0.562332	-0.987585	0.261218	0.549909
Bergen149	60	0	85	2	1	0.159595	-0.507297	-0.16412	-0.273504	0.0573656	-0.250938	-0.888583	0.143483	1.51199	0.842674	-0.0208242	0.482814	0.25204	-0.544884	0.110951	0.306304	0.978661	0.939346	0.26455	-0.142864	0.160686	-0.0321085	0.402069	0.375342	0.0462328	-0.0571789	0.41986	-0.368607	-0.292447	-0.302349	0.962706	0.150042	0.367959	-0.0403219	-0.179898	0.252096	0.28346	0.0362306	0.17103	-0.553185	0.213445	-0.968732	-0.196477	0.448223
Bergen150	60	0	64	2	1	0.169724	-2.44207	0.208106	-0.344282	-0.514915	0.337572	0.222116	-0.0728335	1.90888	2.03809	0.0679233	0.145253	0.0211716	0.520445	0.433313	-0.562494	1.3487	0.95966	0.205817	-0.168962	1.18503	0.00983665	0.32891	0.193833	-0.225426	-0.240099	0.809273	-0.794174	-0.168237	-0.394781	0.964201	0.115076	-0.0841399	-0.0524062	-0.145774	0.230815	0.737218	0.106109	0.288194	-0.864416	0.696842	0.47115	-0.0430435	1.70265
Bergen153	29	1	81	3	1	0.145742	0.0669583	0.402846	1.16524	0.273527	-0.0251721	0.238714	0.634531	-0.942352	-0.937695	0.191452	1.04093	0.112031	0.678806	0.686578	1.14825	0.799748	-0.649991	0.353541	-0.0349171	-0.633225	0.174256	0.0192239	-0.123214	-0.254033	0.331597	-0.823421	0.299812	0.238702	-0.437202	-0.511138	0.0856358	-0.274786	0.0658812	0.256355	0.0481663	1.52043	1.59742	0.307803	-0.732014	0.202337	0.349535	-0.286267	1.42359
Bergen154	46	0	64	2	1	0.365931	-1.42579	0.467687	0.483774	-0.15249	0.679536	0.759632	-0.0147461	2.26746	1.98511	0.866687	0.58001	-0.0809962	1.20456	-0.181888	-0.0458254	1.76285	0.867506	-0.0154849	0.836475	-0.832934	0.141924	0.417425	-0.168964	-0.267365	-0.0186299	0.437664	-0.395833	-0.0741402	1.533	-2.08557	0.516536	0.921548	0.184087	-0.0667043	0.0205213	0.572027	0.032994	0.34767	-0.441165	0.197189	0.405146	0.290492	0.174371
Bergen156	36	0	72	1	2	0.496271	-0.270464	-0.221676	-0.814832	-1.60179	-0.711635	-0.384779	-2.05219	-0.490004	-0.0261171	0.11872	0.576968	-0.0025433	0.61982	-2.19045	0.818909	1.31159	0.413933	0.600792	0.317116	-1.7926	0.712994	-0.731533	0.267659	0.333218	0.626211	1.72346	-1.31081	0.458924	0.807587	-0.0786073	0.870641	1.83073	0.497397	-0.0842965	0.131394	0.423009	0.868676	0.375356	-0.0760135	1.46545	-0.96225	0.749564	0.426462
Bergen157	46	0	71	2	1	-0.0462406	-0.71579	0.652337	0.112542	0.0345291	-0.230794	-0.639199	-0.370686	1.42769	0.845945	0.189895	0.469105	0.332733	-0.0141188	0.187157	-0.582045	0.788603	0.45433	0.068789	-0.308706	0.487276	-0.10903	-0.349637	0.000559631	-0.333018	-0.323397	-0.00788268	-0.686971	0.0758459	0.681783	0.742408	-0.0472658	-0.104719	0.235839	-0.197361	0.128611	-0.0108178	0.255724	-0.295625	0.116841	0.408853	-0.40975	-0.185205	0.410479
Bergen159	54	0	62	3	1	0.304743	-0.121982	-0.484547	0.208714	-0.79654	0.445088	0.668807	0.0936806	2.80845	2.40537	0.067327	0.404889	-0.215656	0.489365	-0.865387	-0.3117	0.96316	-0.0898789	-0.0341841	-0.137792	-0.490795	0.308662	0.00329785	-0.16186	-0.0187931	0.0693561	0.168941	-0.955783	0.15317	2.29565	-1.56877	-0.0309961	-0.0424657	0.208764	0.0161085	0.319911	0.299722	0.853949	0.397073	0.865608	0.634924	0.597664	-0.191344	1.70477
Bergen161	53	0	72	1	1	0.359245	-1.11853	-0.289127	-1.14035	-0.603747	-0.654702	-0.9111	0.381136	-0.502452	-0.714052	0.334911	-1.34636	-0.573254	0.367519	-0.704142	-0.0286088	1.55683	1.21015	0.700505	0.111589	0.68502	0.337773	0.54862	-0.230053	-0.0362237	0.0423426	0.384401	-0.4609	-0.0129503	2.33613	-0.743467	0.940563	0.357815	0.346046	-0.0845336	0.0265432	-0.0281124	0.161032	0.220662	-0.312056	0.385219	0.128071	0.230736	0.358816
Bergen163	52	0	74	2	2	-0.0141399	0.254357	-0.19621	-0.640061	0.3263	-0.43606	-0.355513	-0.0755592	1.03358	1.07814	0.669295	0.936098	-0.655005	-0.171242	0.429917	-0.696838	0.748867	0.461379	-0.371686	-0.0374324	-1.4829	0.121988	0.643647	-0.242794	1.00339	-0.289638	-0.209173	-0.277611	-0.0993929	0.656116	-0.957239	-0.116863	0.617973	0.458359	0.0289791	-0.155061	0.297685	0.163991	0.165384	0.289561	-0.133029	0.97371	-0.301283	-0.149435
Bergen164	37	0	66	2	1	0.264923	-1.34485	-0.0921994	-0.514119	-0.830902	-0.126596	0.0689011	-0.0850603	1.41276	0.790801	0.672898	-0.693416	-0.753093	0.231376	0.6502	0.516019	1.19581	0.773646	0.226065	-0.00154905	-0.271091	0.282411	-0.35244	-0.421718	-0.141283	0.171006	0.106579	-0.173664	0.232486	0.0451715	-1.5301	0.0719325	2.28676	0.196642	-0.00984701	-0.143512	0.878329	0.0677061	0.359559	-0.396109	0.0213579	0.66562	-0.0428479	0.810865
Bergen165	38	0	41	1	1	0.00832059	-0.652027	0.0750503	-1.20337	0.341327	-1.62455	-0.913528	0.279113	-1.51273	-0.881643	-0.353967	0.120187	0.787284	-0.43027	-0.30018	0.153785	0.352247	-0.197683	1.13983	-0.0977734	1.43661	0.209616	0.251486	-0.679846	-0.521851	-0.156145	-0.0543905	-0.114587	-0.106686	0.525616	1.06554	-0.401121	-0.728987	-0.0458884	-0.232296	-0.412419	0.0891854	-0.149754	-0.196911	0.733455	0.955166	-0.081624	0.19267	0.240446
Bergen166	20	0	58	1	1	0.350375	-0.550395	-0.310212	-0.495143	-1.60548	-0.527458	0.122345	-1.90293	0.815865	1.72131	0.760983	0.757226	0.152383	0.357877	-4.50535	0.33946	2.37796	-0.0937404	0.566309	-0.468661	-2.49749	1.25572	-0.888905	0.384536	0.465603	0.626168	2.30053	-1.40925	0.620927	0.372213	-2.14146	0.683731	0.521803	0.968601	-0.242675	0.0744206	0.609864	1.08367	0.0927277	0.346346	1.37042	0.110618	0.752457	1.72127
Bergen168	38	0	75	2	2	0.251351	-0.769863	-0.237417	0.304612	0.578331	-0.387583	-0.46107	0.0183948	2.22451	1.7425	-0.340479	-0.756744	0.137943	-0.211362	1.06311	1.14755	0.870919	0.418409	-0.0314354	-0.139537	1.30771	0.199765	-0.505192	-0.222284	-0.178741	0.0954961	-0.348773	-0.0421325	0.203459	0.988467	-1.29194	-0.435758	0.100375	-0.0674318	-0.134269	0.277404	0.631367	-0.277313	0.276943	-0.271042	-0.535939	-0.777528	-0.409105	0.217276
Bergen169	19	0	58	1	1	-0.123474	-0.120948	-0.162401	0.0662334	0.300996	0.027152	-0.161487	-0.412861	1.04107	1.14788	-0.17753	-0.0771395	0.31387	1.06062	-0.556978	0.0969549	0.151588	-0.12598	-0.30167	-0.153696	1.42398	-0.0830591	-0.218531	-0.447864	-0.559534	-0.0925576	-0.830216	-0.237204	-0.132805	1.03914	-1.05596	-0.174848	-0.0322084	0.153503	-0.0130814	-0.237282	0.321902	-0.323237	-0.0799452	1.33708	-0.445822	0.856144	-0.362103	1.13756
Bergen170	38	0	50	1	1	0.326324	-0.497408	-0.418501	-0.925805	-0.180334	-1.00821	-1.06166	0.0979383	0.513861	0.315397	0.347237	0.550165	0.30613	-0.481821	1.11583	0.101005	0.833089	1.33539	-0.0556242	0.32972	-0.254391	0.267473	0.394535	-0.15697	1.19289	-0.0859345	0.328626	-0.283579	-0.0443976	-0.0229814	0.58976	0.345329	0.594247	0.17029	-0.307139	-0.0719404	-0.159708	0.0795948	0.290591	-0.681046	0.786675	-1.37202	-0.0179091	-0.491416
Bergen171	34	0	56	2	1	0.092061	-0.964433	-0.182669	0.00444488	0.241591	0.262637	-0.166488	-0.0814313	1.33822	1.38559	0.565864	0.155999	0.197497	-0.564117	0.0473932	0.0851728	0.943049	-0.364454	0.273254	-0.380829	1.38705	0.0868212	-0.365711	-0.270025	-0.543124	-0.0178006	-0.0045083	-0.48084	0.189896	-0.000622185	-1.41527	-0.0873426	-0.118937	0.503642	-0.159535	0.353117	0.348532	0.409607	0.0761666	-0.472823	-0.0473444	-0.564324	-0.353014	0.76679
Bergen172	43	0	50	3	1	0.085127	-0.434092	-0.370548	-0.515846	0.750231	-0.755826	-1.06021	-0.0829346	0.950915	1.19116	-0.146698	0.0543092	0.475727	0.0332097	0.225831	1.09335	0.367106	0.642156	-0.0681125	-0.130441	1.36528	0.183175	0.963605	-0.164043	0.0236315	0.110524	-0.159179	0.0619385	-0.200612	0.191894	-0.407741	0.0737023	-0.309459	0.0391966	0.0203989	0.00856062	0.296216	0.212732	0.267488	1.03324	-0.257412	0.26717	0.562876	1.0501
Bergen173	9	0	55	1	1	-0.0775519	-0.700401	-0.267462	-0.517542	0.390188	-0.608685	-0.976627	-0.0567212	0.0759961	0.0103382	0.47021	1.34825	1.0581	-1.0883	0.0651096	-0.632591	0.804349	0.854062	-0.047088	-0.132656	0.740477	-0.176518	-0.119301	0.192382	-0.107779	-0.285694	-0.316402	-0.215895	-0.121342	-0.430935	0.544844	0.128547	-0.107468	0.700228	-0.141493	0.255053	-0.0731882	-0.109229	-0.00109758	0.718209	0.183932	-1.43649	-0.295397	-0.407081
Bergen174	48	0	82	3	1	0.61042	-1.64371	-0.340817	-0.984487	-0.97597	-1.01139	0.476788	1.04929	0.147447	0.163345	0.0711835	-2.04757	-0.395695	1.01471	-0.171546	0.60976	1.80776	1.17871	1.26143	-0.839118	0.163588	0.660997	0.0264991	-0.114359	0.223139	0.228481	1.78772	-0.997938	0.0624795	2.95579	2.00101	1.08572	0.952556	0.475876	-0.211621	0.102569	0.480337	0.488368	0.0410586	-0.704267	1.14765	1.17365	0.692328	0.617246
Bergen175	36	0	75	3	1	-0.0625118	-0.290016	-0.377165	-0.32647	0.31885	-0.381958	-0.533197	-0.576996	1.61872	0.865903	-0.125376	0.207693	-0.67376	-0.631726	0.265763	-0.370021	0.439336	-0.53293	-0.263717	0.32204	0.435203	0.00650608	-0.418441	-0.154784	-0.270487	-0.199706	0.471889	-0.366805	-0.184128	-0.0735917	-1.31318	-0.378068	0.614833	0.0166503	-0.154177	-0.232852	-0.432369	0.0633018	0.148821	0.642705	0.647214	-0.0276256	0.213353	0.626729
Bergen176	24	0	47	1	1	-0.273653	-0.829042	0.263196	0.00175465	0.691127	0.550687	0.268363	0.099777	2.73255	2.34695	0.782117	0.242278	0.245665	0.166206	-0.176453	-0.812821	0.993344	-0.0986111	0.0711261	-0.362011	2.14243	0.0362344	0.162161	0.41992	-0.633573	-0.310764	-0.133503	-0.655436	0.224662	0.280961	-1.01116	-0.502829	-0.20426	-0.14372	-0.215817	0.500095	0.694721	0.112054	0.544819	1.16663	0.8633	-0.986495	-0.165128	1.78054
Bergen177	37	1	64	2	1	0.146316	-0.883314	-0.264915	-0.12693	0.30533	0.999697	1.15633	0.56989	3.95188	3.23096	0.465575	0.529861	-0.589972	0.212965	-2.63757	-1.01253	0.798742	-0.621736	-0.226532	0.383645	1.60877	0.333244	0.223646	-0.440343	0.771136	-0.330453	0.0247583	-0.601464	-0.0383362	1.62097	-1.26369	-0.0901755	-0.112823	0.250719	-0.023898	-0.329315	0.264728	-0.0313118	0.275077	1.39125	-0.22014	0.261762	0.545857	-0.0770485
Bergen178	14	1	93	2	2	0.189536	-0.231608	0.144829	-0.162056	0.519074	-0.255267	0.0251492	0.190407	1.84678	1.58993	0.0517833	0.177701	0.738051	0.140758	0.360466	-0.0435321	0.865987	0.998894	-0.226408	0.0474003	1.23341	0.0519527	0.433772	-0.361357	-0.181463	-0.102585	-0.341483	-0.0610206	-0.159116	0.429455	0.366313	-0.025667	0.73601	0.326918	-0.0645103	-0.0304906	0.0789589	-0.1731	-0.143184	-0.00274274	-0.157931	0.0990384	-0.532897	-0.0977229
Bergen179	35	0	65	2	1	0.590661	-1.86961	0.512648	-0.377	-1.12104	-0.28825	0.024013	0.753471	0.0241682	0.458666	1.04624	0.254311	-0.297894	0.127971	-0.277119	0.306506	1.12682	0.992909	1.00106	-0.06041	0.963463	1.02685	-0.126096	-0.181835	0.416976	0.180597	1.74503	-0.646491	0.251568	1.102	1.28911	0.844008	0.719553	0.322511	-0.220723	-0.0560898	-0.191084	0.339891	0.193191	-0.27981	0.791651	-1.78948	1.25703	-0.13474
Bergen180	40	0	65	2	1	0.555564	-0.127804	0.100498	-0.875526	-1.48396	-1.08563	-0.843221	-2.101	-0.667275	-0.0801253	0.00681603	0.23919	0.0835151	0.0157818	-2.74334	0.619546	1.35547	1.46753	0.667906	0.0813942	-2.47962	1.12543	0.0899827	0.26115	0.466433	0.710182	2.30675	-1.23584	0.560007	1.03186	-1.80189	0.894973	1.3688	0.438198	-0.0662732	0.0145997	0.274927	1.03834	0.191063	0.388676	1.37702	-1.42567	0.50917	0.0606315
Bergen181	37	0	69	2	1	0.116476	-0.565924	0.404728	0.582674	0.577256	1.38327	1.19548	0.687364	0.364162	0.329163	0.733689	0.559509	1.0035	0.476914	0.00305216	-0.77442	0.830902	-0.0391867	0.388868	-0.0402047	1.2102	0.116151	-0.221268	-0.683627	-0.581394	-0.375022	-1.14205	0.025621	0.0957391	0.845609	-0.0245766	-0.272	-0.250259	1.14415	-0.150377	0.304301	0.506146	-0.4251	0.0172141	0.672998	-0.457643	0.0782186	-0.276071	1.27233
Bergen182	27	0	45	2	1	0.0940156	0.846787	-0.081842	0.0551123	0.898448	0.301016	0.248903	0.098656	1.27471	1.61398	0.156116	0.187735	-0.60127	0.851522	-1.87451	-0.178254	1.54838	-0.33261	-0.183363	-0.269307	1.0185	0.562224	-0.031476	-0.515291	0.0390344	-0.123415	0.929235	-0.196323	0.359694	-0.402858	-0.588685	-0.0435812	0.615673	0.59673	0.18622	0.558654	0.310033	0.854645	0.289716	-0.743828	-0.130906	2.36593	1.12083	0.25757
Bergen183	60	0	50	2	2	0.253862	-0.806598	-0.270976	-1.26034	0.345838	-0.0206986	0.182381	-0.0321172	0.130472	-0.0646481	0.22238	0.66609	0.314154	0.0433454	0.463184	0.637632	0.137155	1.15973	-0.0112104	-0.0343326	1.82251	-0.126	1.24215	-0.0231204	0.833399	0.130278	-0.132232	0.26232	-0.220973	0.502739	-0.102052	0.243657	0.932021	0.00976745	0.0197164	0.0293635	-0.247273	-0.213807	0.402609	0.293079	-0.28593	-0.0230074	-0.304383	-0.328094
Bergen184	58	0	52	3	1	0.51832	0.393702	-0.213954	0.103646	0.265055	-0.737342	-0.965812	-0.140246	1.85466	1.51537	0.104627	0.535242	-0.652721	-0.894027	-2.98581	-0.69413	1.05305	0.0464358	0.393189	-0.287858	-0.37543	-0.015455	0.378797	-0.175253	0.209165	-0.107877	-0.157798	-0.59441	-0.071463	2.60672	-1.10167	-0.0758783	1.58377	0.358185	-0.149081	0.00804972	-0.221302	0.0220233	1.72057	0.841606	0.660011	0.112688	0.0321816	0.820116
Bergen185	59	0	89	1	1	-0.102837	-0.709435	-0.387921	0.163869	0.745825	-1.58638	-1.77568	-0.236673	1.14669	0.781155	-0.153481	-0.990463	0.855364	-0.642849	0.448783	0.0512391	-0.104643	1.11573	-0.0969612	-0.244749	0.807921	-0.11974	-0.0637641	0.509968	-0.0694662	-0.060084	1.0903	-0.496081	0.128183	-0.543263	0.312288	0.130838	0.322056	0.13342	-0.244524	0.0258264	-0.0357162	-0.0261382	-0.276461	0.487254	0.4726	-1.89192	-0.0872477	-0.580785
Bergen186	59	0	63	2	1	0.398099	-0.487291	-0.629722	-0.557528	0.152122	0.475117	0.102802	0.285181	1.79252	1.59705	0.668122	1.34019	-0.596197	-0.853718	-1.69104	0.552912	0.162086	-0.0114333	0.0479569	0.115109	0.702381	-0.0138394	-0.643081	0.0205514	-0.427078	-0.0192705	-0.305738	-0.198113	-0.0192033	0.672174	-1.7893	1.09309	-0.167586	0.377533	-0.132886	0.440033	0.315545	0.335973	0.140436	1.39024	0.142467	-0.808569	-0.559151	1.22473
Bergen187	60	0	53	2	1	-0.125764	-0.237933	-0.500621	0.138717	0.316567	0.283532	0.645074	0.0718193	2.80853	2.32868	0.631785	0.425305	-0.294095	-0.493839	0.251665	-0.413446	0.950564	-0.626794	-0.303541	-0.240329	0.773275	-0.0139161	-0.606446	-0.189072	0.115057	-0.142902	0.47393	-0.538645	0.357862	-8.41641e-05	-1.05459	-0.354972	-0.493559	0.0781978	-0.103262	-0.127898	0.179832	0.153981	0.285054	0.9802	-0.219949	0.580196	-0.209792	1.94076
Bergen188	60	0	46	3	1	0.209438	-0.223337	-0.262169	-0.566154	0.543854	-0.493996	-0.122428	-0.266811	0.600927	0.746748	0.698328	0.877284	0.136751	-0.325005	1.23597	-0.502573	1.31189	0.44559	-0.268118	0.00392021	-0.726958	0.152547	-0.253464	-0.239245	0.287445	-0.23427	0.778116	-0.209694	-0.0289398	1.98487	-1.00411	-0.0136861	0.634755	0.10551	-0.21826	-0.257824	0.140032	-0.0994004	0.229051	-0.459389	-0.0967935	-1.00368	0.0628554	0.447153
Bergen190	60	0	60	2	1	0.069864	-1.21835	0.0810267	-0.203142	0.182643	0.0796638	0.236143	0.229837	1.45842	1.277	0.269013	0.549311	-0.389932	0.173115	-0.770054	-1.00117	0.777876	-0.198934	-0.199058	0.38775	1.32678	0.0726464	-0.310974	-0.298252	-0.158176	-0.212972	0.373645	-0.308847	0.0974239	0.900166	-0.548786	0.0771786	0.563487	0.0688865	0.0262579	-0.166421	0.223894	-0.0467673	0.307171	0.33029	0.12386	0.562808	0.0792812	1.27533
Bergen191	60	0	63	1	1	0.236065	-1.70523	0.180805	0.976986	-0.376927	-1.01665	-1.12552	0.104799	1.59474	1.53689	0.541307	-0.323188	0.0573704	0.379759	1.04411	0.399373	0.943297	0.758183	0.107115	-0.0343758	1.6699	0.411009	-0.285859	-0.211777	-0.0384772	0.313621	0.419146	-0.179046	0.168912	0.0158905	-1.12684	0.378332	0.31346	0.124268	-0.305762	-0.103202	-0.248334	0.121562	-0.111827	-1.04329	0.0346365	-1.39617	0.387671	0.576948
Bergen192	60	0	56	1	1	0.310095	-1.43067	0.25767	0.632339	-0.0478999	-0.287651	-0.373236	-0.114942	0.785229	0.628045	0.421486	0.198104	0.020067	-0.177663	-0.206953	0.155069	0.344763	0.504841	0.644743	-0.107816	0.795565	0.249279	-0.195802	-0.0522884	-0.303391	-0.0357779	2.1988	-0.505032	0.000309651	0.0253243	-0.339476	0.765561	0.226217	0.188666	-0.0451247	0.195093	0.0893015	0.150736	-0.0980658	-0.56497	0.0742421	-0.628414	-0.151205	-0.445967
Bergen193	60	0	35	2	2	0.295978	-1.21893	0.267416	-0.301829	0.195289	-0.209451	-0.464011	0.251842	1.35141	1.06134	1.10266	-0.0216403	-0.508737	0.12453	-0.0578289	-0.415709	0.555243	0.0937549	0.450822	0.00455033	-0.0446179	0.205316	0.0495651	-0.0415681	0.34247	-0.222387	-0.0730112	-0.427951	-0.186999	3.18368	0.468389	0.382755	-0.206281	0.172222	-0.282283	-0.0354495	-0.0443741	-0.31021	0.0173586	-0.362999	0.0746751	-1.88794	0.0129546	0.325213
Bergen194	60	0	70	2	1	0.302093	-2.41607	-0.384115	-0.402767	-1.22509	0.167931	0.412459	0.188204	2.52313	1.96843	0.316488	-1.06832	-0.631027	-0.0510544	-0.932744	0.0229249	1.41323	0.0186951	0.554974	0.409349	-0.418979	0.276528	-0.300972	-0.11044	0.0949276	0.135168	0.30865	-1.06417	0.40572	0.167839	0.369665	0.871391	0.670584	0.499743	-0.290021	0.0653444	0.629029	0.261096	0.43944	0.435607	1.18236	-0.170397	0.335935	1.09183
Bergen195	60	0	70	1	1	0.0861078	-0.591243	-0.231019	0.611724	0.511654	0.785162	0.907402	0.0475937	1.62196	1.43945	0.560332	0.52338	0.274898	0.268617	-2.29336	-0.0253197	1.47386	-0.137213	-0.0313478	0.119765	2.20911	0.138179	-0.116282	0.0790796	-0.333618	-0.0793637	0.287228	-0.450223	0.068075	-0.272293	-1.33403	0.0171112	0.431327	0.133226	0.0997082	0.337234	0.835871	0.0135438	0.475078	-0.127041	0.389991	1.32914	-0.104007	1.76864
Bergen198	60	0	60	1	1	-0.00232076	-2.04344	-0.408536	0.266586	0.129962	-0.271165	-0.519771	0.22833	1.846	1.75129	0.408057	-0.468144	-0.0418564	-0.623199	-0.00612287	-0.053684	0.591209	0.359671	0.14866	-0.253196	1.83292	-0.0776198	-0.363907	0.0936109	-0.312602	-0.0520202	1.01158	-0.74769	0.0642136	0.901531	1.037	0.14855	0.0474854	0.038131	-0.198815	0.11068	-0.165379	-0.108313	-0.000321521	-0.89996	0.240061	-1.00986	0.0454458	0.158094
Bergen199	58	0	62	2	1	-0.077479	-0.348319	-0.27607	-0.228872	0.0798177	0.315039	0.4651	-0.320392	2.32537	1.8733	0.166003	0.543667	0.0323535	0.710501	0.0364572	-1.15529	0.161971	-0.523158	-0.329962	-0.201304	0.410309	-0.337851	-0.535738	0.0467027	-0.24241	-0.379901	0.41775	-0.524643	0.305499	0.954905	-1.50098	-0.454123	0.563569	0.426726	-0.118525	-0.0562843	0.0173038	-0.0217787	0.269979	0.395789	0.00446288	0.241438	-0.473584	0.902327
Bergen200	59	0	69	1	1	0.192237	-0.0485267	-0.311272	-1.45477	-0.267981	0.184537	0.820705	0.0375945	0.68628	0.345246	0.55539	1.0987	0.618172	0.20433	0.697542	-0.698751	1.22254	0.140152	0.0417217	0.133124	0.125777	-0.000271802	0.0612923	-0.479128	-0.186835	-0.27891	-0.0385576	-0.00954608	-0.229081	2.50846	1.03564	0.25875	-0.0424303	0.486702	-0.187973	-0.228189	0.0873498	-0.0767035	0.285913	1.77577	0.216645	1.63943	0.0552833	0.616031
Bergen201	60	0	58	2	1	0.257086	-0.700013	0.096586	0.268494	0.0703036	0.311746	0.374071	-0.214575	1.63146	0.930552	0.373371	0.665359	-0.289312	0.56874	0.0224191	0.615598	0.773938	-0.415156	-0.208975	-0.314704	0.831031	0.00575473	0.379264	-0.168935	-0.292191	0.0525908	0.417351	-0.464218	0.000381217	0.0338605	-0.00911809	-0.0572992	-0.121821	0.0970003	0.151792	-0.0793876	0.593093	-0.183973	0.170684	-0.73628	0.141075	1.20945	-0.56875	1.49641
Bergen202	53	1	82	1	1	0.333002	-0.442916	-0.224426	0.090267	0.271548	0.335077	0.295899	-0.165546	1.53784	0.781841	0.499675	-0.0274888	0.143189	-0.430783	1.03681	0.13868	0.638935	0.0867241	0.0687918	-0.00433899	0.512599	0.0190654	-0.480814	-0.167365	-0.4952	-0.0628438	0.213815	-0.38975	0.111416	-0.209971	-1.2377	0.212297	-0.481975	1.01086	-0.0107355	0.368921	0.32944	-0.124595	0.12166	-0.389819	-0.234235	-0.155107	-0.490794	0.00206501
Bergen204	50	0	63	3	1	-0.180321	0.00381477	0.2521	0.450608	0.589974	-0.154738	-0.504873	0.469399	-0.727379	-0.612783	-0.526721	-0.0244254	-0.418683	1.6745	-0.103919	0.367668	0.224879	1.02168	0.192302	-0.313848	1.70993	-0.0963809	0.0539884	-0.294121	-0.104463	-0.0466009	-0.443789	-0.128538	-0.191736	0.736007	-0.870839	0.208651	-0.38035	-0.266106	0.211365	0.0285379	0.457005	0.345143	0.373286	0.529919	-0.527051	0.898282	-0.424706	1.7748
Bergen205	60	0	77	1	1	0.159568	0.0101437	-0.202669	0.0133439	-1.04051	0.489714	-0.156025	-0.156296	1.74641	0.538443	0.105038	0.371836	0.351502	-0.140783	0.751362	0.403782	0.903797	-0.261119	0.411938	-0.223628	-0.434615	0.18628	-0.259928	-0.195839	-0.301983	0.0699328	-0.683817	-0.386172	-0.0660697	1.16329	-1.32724	0.0210887	-0.0266278	-0.109649	-0.0623287	0.322808	0.782491	0.686075	0.196895	-0.712564	-0.418611	0.0569462	-0.423101	1.59273
Bergen206	60	0	61	1	1	0.0290283	-2.57812	1.12904	-0.520571	0.160524	-0.396105	-0.622816	-0.16638	0.874786	0.725673	0.27396	0.136783	-0.00485168	-1.39696	0.163691	-0.596081	0.105955	1.16419	-0.127877	0.495947	0.573045	-0.00801768	0.0789697	0.559686	0.373872	-0.22047	1.50007	-0.563298	0.00600478	-0.678482	0.377772	0.200718	0.119509	-0.0920764	-0.0459263	0.280913	-0.115848	-0.349806	-0.132497	-1.0326	0.617419	-1.62825	-0.143518	0.667395
Bergen207	60	0	64	1	1	-0.0583213	-0.839183	-0.349753	-0.0175988	0.49051	-0.283954	-1.09371	-0.134536	2.52436	1.74204	1.55402	-0.312969	-0.712961	-0.678967	-1.57579	-0.107634	0.80889	-0.608206	0.42205	0.0201828	1.64066	-0.0686366	-0.628468	0.146628	-0.631242	-0.262545	-0.305663	-0.831446	-0.155717	2.00705	-1.54516	-0.1873	0.552743	1.70714	-0.0688214	0.177693	0.256044	-0.442156	-0.251255	0.802756	0.182327	-0.0640847	0.346512	-0.285422
Bergen208	49	0	71	2	1	0.28846	-0.0580601	-0.387897	-0.183162	-0.461967	0.417823	-0.226801	-0.281844	0.963772	0.217238	0.964158	1.28207	-0.0769377	0.803079	0.550358	0.394075	0.42185	-0.0793819	0.300695	-0.0422307	0.694223	-0.00258533	-0.296945	-0.0952877	-0.243134	0.0438891	0.705803	-0.525812	-0.07242	0.180013	-1.51528	0.441819	-0.0733023	0.192359	-0.127195	0.0871827	0.489759	-0.197639	0.243816	-0.0827967	0.20168	-0.721214	-0.0930041	1.03025
Bergen209	60	0	57	2	1	0.159195	-0.629744	0.697172	-0.107732	-0.0672415	-0.352543	-0.79973	0.331524	0.830158	0.468903	0.325307	0.232004	-0.423907	-0.379382	-0.803007	-0.706998	0.717769	0.907138	-0.105457	-0.145941	0.673142	-0.00368405	-0.292444	-0.316959	0.844512	-0.254286	1.17	-0.79313	-0.246838	2.89252	2.2387	0.570552	1.05951	0.110992	-0.200646	-0.0778841	-0.455377	-0.324225	-0.0509616	-0.363475	0.0270726	-0.442347	0.0621943	-0.199317
Bergen211	60	0	53	1	1	-0.238305	-2.1542	2.20586	-0.421024	-0.285321	-1.04361	-1.95579	0.995984	0.119111	0.384681	0.382028	0.26982	0.315362	-1.63296	-1.28445	-0.703659	0.821914	1.95399	0.170046	-0.344263	0.679682	0.109621	-0.178273	1.18553	0.250805	-0.332313	2.04192	-0.78491	-0.211241	-0.0167695	3.43016	0.763638	0.0535145	-0.000690319	-0.479667	0.796112	-1.24408	-0.0443552	-0.222462	-1.01111	1.0341	-1.4301	0.220042	-0.278573
Bergen212	60	0	84	3	1	0.106055	-0.836972	0.292278	-0.633406	0.604763	0.776088	0.536867	-1.08021	-1.2369	-0.814318	0.41747	0.137301	-0.822447	0.603799	-1.64508	0.312565	0.134492	-0.460678	-0.0311921	-0.114929	1.07987	-0.0536584	-0.337154	-0.10268	-0.366435	-0.107618	0.758577	0.00908759	0.0454205	0.517015	-1.45294	-0.191128	0.501534	0.520879	0.107659	0.174663	0.0524034	0.167892	-0.39788	1.27503	-0.496548	2.22517	-0.172926	1.98937
Bergen213	60	0	78	1	1	-0.207149	-0.39825	-0.407496	-0.000435576	0.719661	-1.61342	-3.11178	0.00510793	1.12003	0.618388	0.872722	1.45056	-0.188047	-0.837182	-4.33686	-0.312236	4.20046	3.2339	1.21297	-2.10618	2.47601	0.650542	0.979354	1.02513	0.646833	-0.21773	2.18019	-1.61001	0.160657	-0.273273	3.11043	0.0464702	1.47213	0.521902	-0.374642	0.217688	0.549021	0.0453332	0.37512	-0.410288	1.53416	-0.890729	0.481053	1.15171
Bergen10	28	1	61	2	3	0.186212	0.479524	0.0970333	-1.264	-1.502	-1.61561	-1.25092	-1.38454	-0.86936	0.0802213	-0.375488	-0.528181	0.0817733	0.670299	-2.73052	0.0800203	0.829993	-0.232029	0.429261	0.00291332	-1.26083	1.42476	-0.159114	-0.0210076	0.76122	0.447281	2.33267	-1.0648	0.563304	0.421516	1.00133	0.452823	0.904135	2.33196	-0.0954823	0.105218	-0.25851	0.771377	-0.172685	1.04054	0.417771	-0.674797	2.43482	-0.48486
Bergen17	7	1	73	2	4	0.342812	-0.468698	0.0029423	-0.918718	0.649179	-0.113135	-0.705257	-0.161021	1.45755	1.00075	0.336751	0.899415	0.367573	-0.00978091	-0.124761	-1.00274	0.525665	0.151278	1.24932	-0.281378	2.02461	-0.0431832	-0.00699995	-0.728282	-0.648269	-0.531471	-0.116259	-0.203214	-0.450521	0.0279641	1.32975	-0.433627	-0.0891143	0.874654	-0.165548	0.213127	0.74503	-0.301393	-0.241603	1.43313	-0.657736	-0.113005	0.324053	0.271954
Bergen38	3	1	77	3	4	-0.102509	-0.671173	1.17328	-0.56289	-0.177598	0.634972	0.0472944	-0.029765	0.543541	0.604112	0.236234	0.256749	-0.707673	0.446154	0.215593	-0.493831	0.509322	-0.99756	0.202019	-0.291195	1.27664	0.640532	-0.14688	0.0364848	-0.37669	-0.265761	-0.256098	-0.304509	0.127278	0.689689	-0.772417	0.118865	1.2433	-0.0323808	0.0564063	0.181472	0.16578	0.127026	-0.177213	1.20477	-0.380453	0.722498	1.42557	0.715558
Bergen43	30	1	76	2	3	0.66003	0.602386	0.00779382	-1.42496	-0.682118	-1.43958	0.0251989	-0.299455	-0.817246	-0.299034	0.644721	0.175499	-0.311436	0.965482	-1.99377	-0.0204601	0.450233	-0.697019	2.60092	0.0155556	0.772643	0.776098	-0.52189	-0.363293	0.182647	0.301077	0.229904	-0.62843	0.299441	1.4467	-0.564198	0.0698764	1.94485	1.89477	-0.0222992	-0.0853935	0.633376	0.244109	0.146119	2.33058	0.196462	0.71071	1.08695	0.191912
Bergen49	60	0	55	2	3	-0.224003	-0.806745	0.969808	-0.311985	0.0361694	-0.82458	-1.02072	0.0556239	2.07353	1.51932	0.644604	0.354073	-0.0342165	-0.540738	0.109684	-0.574786	0.721598	0.340591	-0.161441	0.122445	0.596071	-0.108887	-0.269784	-0.185943	0.177664	-0.316118	0.259173	-0.683765	0.181798	-0.0968405	1.57583	0.894329	0.335251	-0.10044	-0.284242	-0.0376917	-0.171838	-0.159555	-0.222778	0.492706	-0.161296	-1.94404	0.597507	-0.392382
Bergen70	60	0	69	1	3	0.172309	-0.282043	0.139152	-0.391826	-0.731303	-0.664638	-0.750572	-0.417856	0.780562	0.491363	0.0355041	0.588604	-0.835093	-0.634333	-0.566848	-0.61386	1.06623	0.084308	1.21196	-0.165007	-0.765703	0.256961	0.295119	-0.905488	-0.0360694	-0.330101	-0.734489	-0.857888	-0.047917	2.82326	1.66261	0.112026	-0.191429	0.339855	-0.132708	-0.102214	0.207723	-0.0306496	0.0236351	0.367792	-0.0453456	0.4619	0.900939	0.0279431
Bergen84	8	1	74	3	4	-0.0441053	-0.606272	-0.0152327	-0.0116073	-0.557516	-1.07193	-1.58524	-0.132521	0.181793	0.00379728	0.1896	0.173532	-0.155056	0.332762	0.308634	-0.0880868	0.195484	-0.217825	0.100363	-0.0107309	-0.648758	0.704348	-0.100176	-0.0760575	-0.223848	-0.125904	0.711632	-0.646029	0.1257	0.931116	1.58997	0.720968	-0.258083	0.0273165	-0.117087	-0.05143	-0.370171	0.112007	-0.177568	-1.43659	0.204268	-0.287429	1.89729	0.361825
Bergen88	60	0	63	2	3	0.216943	-0.532177	-0.140993	-0.369287	-0.481008	-0.640917	-1.23139	-0.140692	0.948221	0.536709	0.409828	0.52194	0.255948	-0.33759	0.117427	0.341259	0.731246	-0.207749	0.0552332	0.474658	-0.924685	0.571269	-0.58634	-0.0225936	0.202869	0.170284	1.38482	-0.56563	0.0203158	0.504861	-0.565343	0.299206	0.411406	0.0731181	-0.180155	0.0575134	0.208643	0.533474	-0.128018	-0.118154	0.356949	-0.727989	1.54493	-0.361726
Bergen100	60	0	59	2	4	0.125429	-0.232557	0.20966	-0.314823	-0.29801	-0.788982	-1.31871	0.0960815	0.792676	0.269306	0.440043	0.289819	0.0547454	0.0242284	0.98463	0.515889	0.290446	0.775218	0.114355	0.225501	-0.1634	0.109135	0.402213	0.0048802	0.404774	0.0623007	2.28828	-0.366053	-0.21163	0.133327	0.45547	0.435683	0.673914	0.106959	-0.192358	-0.0670328	0.455688	-0.0925157	-0.20502	-0.650275	0.401024	-0.930669	1.45697	-0.635172
Bergen114	31	1	62	2	4	0.0842563	0.331801	-0.226356	-0.14722	0.0962722	0.639902	0.365951	0.329786	2.09226	1.61552	0.79938	0.797295	0.429276	0.0335699	-0.760863	-0.999181	0.854125	0.508311	-0.0695592	0.0857587	0.913256	0.0988733	-0.0601157	-0.667762	-0.0243744	-0.457329	-0.3276	-0.187543	-0.368572	0.658323	1.59342	0.185441	0.406345	0.180363	-0.0579714	0.00623309	0.651839	-0.0532153	0.326891	1.18846	-0.00164578	0.759982	0.224647	-0.00482441
Bergen119	31	1	65	3	3	0.103189	0.380175	-0.287761	0.355767	-0.552251	0.34737	0.354821	0.455579	3.70199	3.29822	0.665055	0.0640441	-0.310944	0.797704	-0.753504	-0.428243	0.826988	-0.426184	0.155502	0.270524	0.468688	-0.0201691	0.834613	-0.319861	-0.12689	-0.111871	-0.136281	-0.816442	-0.0021513	1.23788	-1.17373	0.0836016	0.752369	0.106495	-0.0920834	0.000683956	0.694661	0.126321	0.384001	1.05958	0.453042	0.5907	0.175588	0.877325
Bergen123	60	0	84	3	3	0.0710476	0.0382499	-0.28077	-0.340554	1.16288	0.145002	-0.316555	0.390268	2.4306	2.00257	0.326369	0.272426	0.425734	-0.165821	-2.45269	-0.0855224	-0.251426	0.0164892	-0.0896143	-0.228013	1.89376	-0.00593142	-0.197703	-0.12302	-0.00491673	-0.0408021	-0.974324	0.0564435	-0.0658954	0.341342	-1.29001	-0.256428	0.758435	-0.0727293	-0.0412335	-0.0676137	0.450119	-0.158316	0.18302	1.81077	-0.393539	0.282951	-0.49999	-0.21681
Bergen131	12	1	83	2	4	-0.0846173	0.469965	-0.181672	-0.340111	0.342734	-0.16288	-0.738045	-0.126342	0.724641	0.619555	-0.03912	0.641838	0.562994	0.00716766	-1.20617	0.102828	0.4668	-0.154722	-0.229072	-0.151685	0.855501	-0.103208	-0.125213	-0.437069	-0.264331	-0.244415	-1.03109	-0.344682	-0.23258	0.387336	1.16302	0.199165	-0.260272	-0.0665588	-0.142551	0.244613	0.476697	-0.5007	-0.138118	0.299277	-0.164174	0.256249	1.01207	0.128827
Bergen140	6	1	81	3	3	0.437539	0.374979	0.0201556	-0.948852	0.667339	0.00520542	-0.326555	-0.405753	1.12695	0.772043	0.326148	0.820497	-0.517448	0.658564	-2.95673	-0.300285	1.93768	1.37401	0.829127	-0.409224	-0.524529	0.184516	0.255481	-0.315969	0.202332	-0.143163	0.475335	-0.617045	-0.116343	-0.0778603	-0.386828	0.577804	1.07991	0.153815	0.0265956	-0.167502	0.882863	0.0584967	-0.0986787	2.17961	0.219175	1.1893	0.413041	0.221754
Bergen141	58	0	67	1	3	-0.111223	0.125721	0.676619	0.995369	-0.151928	-0.597589	-1.58993	-0.631222	2.2034	1.72162	1.39238	0.544967	0.0551133	-0.839671	-3.97981	-0.736022	3.19154	-0.314027	1.00889	-0.930326	1.90929	0.601793	0.240968	0.146347	-0.145164	0.0126517	1.12165	-1.45157	0.208794	0.851204	-0.178918	-0.734594	0.192828	2.53764	0.0480323	0.294645	0.522903	0.473745	0.230286	0.862188	1.63262	1.0546	0.8752	1.1634
Bergen144	60	0	71	2	3	0.047309	-0.222123	0.754819	-0.151632	0.814975	-0.426166	-1.27672	0.3721	2.24314	1.65563	0.147906	0.754788	-0.258767	0.343185	-3.97957	-0.150644	1.50972	1.50082	0.238818	-0.419561	0.860745	-0.101086	0.775449	0.312666	0.649651	-0.279313	0.000522147	-0.849915	-0.16736	1.32439	1.41429	0.558426	1.12255	0.113042	-0.0402422	0.0787697	0.494959	-0.153749	0.0278667	0.402807	0.341753	0.199706	0.613866	-0.325962
Bergen151	31	0	43	3	3	0.242193	0.695459	-0.170476	-1.15418	0.773769	-0.278871	0.557076	-0.279919	-0.260873	0.0735758	-0.347001	-0.714671	0.214915	1.32882	-0.568811	1.26844	0.372781	0.708196	0.184158	-0.00752476	-0.427306	0.367945	0.443746	-0.264304	1.17296	0.386957	0.636441	0.142748	0.166017	-0.254777	-0.161579	0.308617	1.0579	0.0829162	0.034791	-0.155099	0.506153	0.210601	-0.144509	1.49174	-0.0795342	0.540062	0.364068	0.0601775
Bergen155	42	0	53	3	3	0.813201	1.29229	-0.471864	-1.53313	0.653174	-0.846916	0.899556	-0.13178	-1.06333	-0.843607	-0.493716	0.257993	-0.593336	0.777009	-1.22113	1.38909	1.77381	-0.314337	0.17294	0.27407	-0.49214	0.523493	0.958578	-0.269211	-0.238264	0.446622	-0.191442	0.894916	0.062866	0.321804	-0.857241	0.338782	0.743844	0.39884	0.538983	0.103825	0.657073	1.20084	0.678378	-1.28884	-0.053653	2.76727	0.0410495	0.251442
Bergen158	27	0	61	2	3	0.555064	0.735722	-0.141807	-1.51444	-0.323103	1.38044	1.48547	-0.0677266	0.0147439	-0.529272	0.352348	1.01109	-0.468325	0.111811	-1.2	0.382357	1.07436	-0.504721	0.00922925	0.101513	0.799007	0.295814	-0.296779	-0.150408	-0.462859	0.0987086	-0.11496	0.385628	-0.0688371	3.10443	-2.1282	0.0219778	-0.463105	0.264396	0.136988	0.121857	0.731223	1.44779	0.568337	1.0683	0.549081	1.83177	-0.249096	0.79316
Bergen160	15	1	89	3	3	0.156071	-1.78486	-0.131721	1.19299	0.351303	-0.593883	-1.00262	0.186226	-0.418434	-0.455079	0.338971	-0.841517	-0.829092	-0.734748	0.491639	0.731424	0.708393	-0.631089	0.0335973	0.0214349	1.1675	0.155337	-0.769091	0.00119113	-0.170239	0.143334	-0.157381	-0.533866	-0.0538878	-0.676158	-1.16978	-0.247202	0.424902	0.00192698	-0.0615974	-0.0801744	-0.284752	-0.229281	-0.0106194	-0.523482	0.0308472	-0.479075	0.688776	-0.652509
Bergen162	28	1	49	3	3	0.443651	-0.236487	0.866582	1.67614	-0.994655	0.447077	0.557659	-0.00912609	0.749565	-0.336336	1.08228	0.00174469	-0.716194	1.82769	-0.32416	-0.679649	0.96971	-0.517898	-0.0989002	2.24146	0.987974	0.238037	0.325354	0.649377	0.072845	-0.211011	3.20532	-0.220743	-0.0745076	0.207481	-1.2013	0.388739	0.855537	0.0932248	-0.234021	-0.271992	-0.0748818	0.247826	0.179212	-0.236028	1.07239	-1.02664	0.828665	-0.0141341
Bergen167	33	1	71	3	4	0.385362	-0.015266	-0.305222	-0.456961	1.05612	-0.452275	0.263423	0.371889	0.305776	0.329448	-0.118248	0.256885	1.28004	0.394623	-0.360044	0.0992244	0.983171	-0.202698	-0.117309	-0.127318	1.13075	0.0709608	0.0335633	-0.269952	0.322306	-0.0724717	-0.603536	0.878264	-0.231703	-0.523072	-0.490722	0.125778	0.121382	-0.116525	0.0815883	-0.062912	0.427713	0.0634137	0.0609528	0.748278	0.0346038	0.552448	-0.573729	1.76427
Bergen197	39	1	83	1	3	-0.0110139	-0.452025	-0.337368	0.19855	0.733607	-0.588403	-0.401138	0.219266	2.0185	2.0065	-0.408435	0.0411459	0.218795	0.0744592	0.410365	1.07904	0.775684	0.362537	0.163784	-0.00522711	-0.0997714	0.00416905	0.327684	0.992662	1.09397	0.220752	0.572774	0.000712736	-0.158842	-0.291957	-1.06338	-0.231556	0.23581	0.0529613	-0.0263528	-0.0773252	-0.431458	-0.222394	0.378044	-0.0788298	-0.37768	0.661884	-0.106059	0.792037
Bergen203	59	1	79	3	3	0.209946	-0.324062	-0.306907	-0.412371	-0.0581884	0.217803	0.579688	0.210363	2.09238	1.16324	-0.109886	0.257712	-0.574466	0.446627	0.569042	-0.217059	0.839985	-0.291014	-0.230231	-0.148984	0.461189	0.0473317	-0.453884	-0.0232898	-0.333308	-0.196044	0.684637	-0.110731	0.0378703	0.164562	-0.764115	0.0206291	-0.177716	-0.110437	0.0607944	-0.111579	0.162609	-0.0740003	0.386347	-0.589327	-0.20515	0.762764	-0.115058	-0.160747
Bergen210	6	1	60	3	4	0.728083	0.605517	-0.372941	-1.10277	-0.743177	1.37254	0.871373	0.100985	0.961455	1.06127	-0.269099	-0.362685	-0.592852	2.2454	-1.03865	1.17163	1.37215	-0.685077	0.699978	0.117582	1.14931	0.788246	-0.815179	-0.415449	-0.312578	0.298358	0.528744	0.157203	0.0245191	0.0726134	-0.267351	0.908501	0.0607789	0.902018	0.0818392	-0.100455	1.00205	0.0782075	0.425586	-0.157269	-0.182206	1.91638	0.831705	1.42012
Bergen214	9	1	58	2	3	0.523477	-0.23297	-0.457432	-0.247082	1.31508	-0.206337	-0.631432	0.690871	4.45588	3.64594	1.34771	0.62765	-0.724252	-0.691159	-4.71108	-0.812949	1.29461	-0.811487	0.980163	-0.635969	1.69679	0.285744	0.0210991	-0.553704	-0.37488	-0.299956	0.550106	-0.717684	0.046382	0.57507	-1.10007	-0.266511	0.68338	0.277952	-0.267892	0.331069	0.0628731	-0.0781515	0.24996	1.73365	0.650419	-0.332137	0.959549	-0.341838
[truncated: 142 more columns]
