# Supplementary material for: Integrative Protein-Based Prognostic Model for Early-Stage Endometrioid Endometrial Cancer
Source: Oxford University Press journal article supplement (doi:10.1158/1078-0432.ccr-15-0104), 2015-07-29
Supplement: 10780432ccr150104-sup-143915_2_supp_3067806_nrbpst.xlsx [file 10780432ccr150104-sup-143915_2_supp_3067806_nrbpst.xlsx]

## Sheet: validation
ID	OS	Status (alive=0,dead=1)	Age	Grade	Stage	14.3.3_epsilon	4E.BP1	4E.BP1_pS65	4E.BP1_pT37T46	53BP1	ACC_pS79	ACC1	Akt	Akt_pS473	Akt_pT308	AMPK_alpha	AMPK_pT172	AR	ASNS	ATM	Bak	Bax	Bcl.2	Bcl.xL	Beclin	beta.Catenin	Bid	Bim	c.Jun_pS73	c.Kit	c.Met_pY1235	c.Myc	C.Raf	C.Raf_pS338	Caspase.7_cleavedD198	Caveolin.1	CD31	CD49b	CDK1	Chk1	Chk1_pS345	Chk2	Chk2_pT68	cIAP	Claudin.7	Collagen_VI	Cyclin_B1	Cyclin_D1	Cyclin_E1
TCGA-A5-A0R7	17.8	0	55	2	1	0.0626026	-0.321602	-0.421526	-0.222477	0.184282	-0.126057	0.118061	-0.468585	-0.0219572	0.666753	-0.0022039	-1.4517	0.480041	0.376041	-0.457894	0.306186	0.233213	-0.407583	-0.316723	-0.212157	0.847752	-0.110938	0.316964	0.0574053	-0.215844	0.305258	0.283664	0.468951	0.0279184	-0.255931	0.0924625	0.0655332	0.0291473	0.128389	-0.101631	-0.0696691	0.434238	0.238821	0.143843	-0.0233383	0.118138	0.74563	-0.310871	0.67667
TCGA-AP-A053	6.03333	0	90	3	1	-0.0206772	0.247546	0.068005	-0.178516	0.440935	-0.0841279	0.152953	-0.207472	-1.05776	-1.0841	-0.447164	0.0614894	0.809373	1.39974	0.288371	0.523606	-0.323827	0.722933	-0.279601	-0.155682	0.900987	-0.270639	0.466217	0.0536647	-0.0790399	0.107865	0.0793838	0.28014	-0.14686	-0.1829	-1.4377	0.0584603	-0.122274	0.229118	-0.0925607	-0.132706	0.804981	0.0891467	-0.133432	-0.269243	-0.0841513	2.28546	-0.211148	3.33348
TCGA-AX-A05T	20.1	0	82	1	1	0.437858	-0.0873719	-0.227466	-0.995822	0.230227	-0.237918	-0.238036	-0.220604	-0.0672434	-0.417999	0.22202	0.787595	0.483948	-0.843601	0.525605	0.927503	0.737447	0.397081	0.335875	-0.00854358	-0.264417	0.0868788	0.805764	-0.0251041	-0.217429	0.309179	-0.148141	-0.0458766	0.038852	3.20194	-0.524725	0.07641	-0.0958094	-0.0926247	-0.123128	-0.0916617	0.681961	0.0472395	0.454463	0.297778	0.188973	-0.0924474	0.195298	1.11327
TCGA-AX-A05W	60	0	60	1	2	-0.0251333	-0.316683	-0.166078	0.643675	0.972115	0.0896157	-0.294319	-0.560574	1.21282	1.15478	0.265822	-0.44552	0.443394	-0.427731	-0.501925	0.266909	0.525971	-0.231062	-0.121824	0.0101712	0.746921	-0.403533	-0.356851	0.245094	-0.546842	-0.00479391	-0.528007	-0.25597	0.0230537	-0.184979	0.105526	-0.32234	-0.156336	-0.447957	-0.112189	-0.037823	0.206978	-0.307395	-0.151105	0.327025	0.0636442	-0.606484	-0.113361	-0.0687374
TCGA-AX-A05Y	60	0	57	1	1	0.128193	0.286402	0.196614	0.646332	0.299456	0.0108647	-0.561445	-0.41915	2.22532	1.70249	0.0212572	-0.0871116	0.0981273	0.907957	-0.360028	0.300281	0.00442916	-0.469305	0.132773	-0.104538	0.66795	0.278622	-0.377166	0.194489	-0.0705057	0.0860527	0.318537	-0.0796277	0.254832	-0.5767	-1.83191	0.0759411	0.780034	-0.174892	0.109626	0.115051	0.109131	0.0762698	-0.209213	1.42573	-0.0506296	-0.30585	0.12794	-0.411637
TCGA-AX-A060	35.8333	0	77	3	1	-0.0103828	0.123477	0.0113351	0.640084	0.983409	0.0228982	-0.234624	-0.660306	1.89223	1.69011	-0.121759	-0.424742	0.246466	-0.678433	-1.20371	0.180746	0.47309	-0.242894	-0.297358	-0.263099	1.43791	-0.311018	0.238609	0.869921	-0.658235	-0.153924	-0.449296	-0.419858	-0.0542277	-0.54084	-1.58368	-0.439428	-0.678254	0.257321	-0.141323	0.309257	0.243431	-0.291788	0.0344338	1.17741	0.00717147	0.895542	-0.160882	0.443058
TCGA-AX-A062	46.6	0	53	1	1	0.390067	-0.633231	-0.357091	-1.25557	-0.278717	-0.730286	-0.886936	-0.266961	-1.06502	-0.955141	0.104745	0.497175	-0.287437	-0.425806	-0.203784	0.777012	1.05652	1.10995	0.204375	0.140025	0.777615	0.0350623	0.503034	-0.0238725	-0.171663	0.478008	0.356234	-0.0255015	0.124637	1.02808	1.09896	0.205649	1.1806	0.480277	-0.043162	-0.0746007	0.404919	0.444838	0.720044	-0.314222	0.618749	1.00773	-0.0894901	-0.236681
TCGA-AX-A06B	54.6333	0	72	3	1	-0.0438673	0.670478	-0.0974031	0.0280243	0.465181	-0.569171	0.170024	-0.746716	-1.42315	-1.13272	0.00635866	-0.224301	1.38681	1.56115	-0.620072	0.675296	0.22439	-0.137584	0.378006	0.287384	0.544348	-0.279133	0.752462	-0.0835866	-0.240367	0.187831	-0.12729	-0.0409214	-0.136177	-0.221809	1.04228	0.067791	0.0427901	0.0356411	-0.16909	-0.0126707	0.154038	-0.0708646	0.0299678	-0.303636	0.537692	0.426783	-0.0854441	0.954996
TCGA-AX-A064	35.4667	0	81	2	1	0.115358	0.118322	0.0770336	0.0759937	0.22801	0.445525	0.18111	0.838241	3.50486	3.17367	0.504634	0.558724	0.132532	0.394386	0.329432	-0.517869	0.320764	-0.184636	0.00981423	-0.0379004	1.23833	0.12361	0.549416	-0.363089	-0.337463	-0.033563	-0.479168	-0.00540133	0.103883	-0.0132167	-0.33586	-0.0240281	0.391785	0.0634341	0.147371	-0.146044	0.813976	-0.223431	0.315509	0.803369	-0.192715	1.15893	-0.00593983	0.701489
TCGA-AX-A0IZ	44.4333	0	53	3	1	-0.0125656	-0.635045	0.549272	-0.257891	-0.143598	-0.0530715	-0.36791	0.643573	0.448838	0.502182	0.357073	-0.256378	-0.381218	0.608838	0.296173	-0.220799	0.0765267	0.675776	0.114984	-0.252215	1.26547	0.0255036	-0.236021	0.0692506	0.111965	0.0560637	-0.2021	-0.0585938	-0.0875407	2.24303	2.8431	0.227322	0.443663	-0.0156237	-0.150671	0.226898	0.196571	-0.276829	-0.213786	-0.0899641	-0.0436967	-0.117352	-0.129811	0.240068
TCGA-AP-A051	60	0	69	3	1	0.25503	-0.0677699	0.594722	-0.714838	0.149147	-0.00125403	0.152816	0.0900669	0.973286	0.748308	-0.0728766	0.454533	1.10178	2.20507	1.0095	0.378156	-0.332385	0.456347	-0.211599	0.0574825	0.729485	-0.239602	0.356183	0.037556	0.344649	0.264987	-0.472711	0.153542	-0.0780754	-0.264936	-1.25596	0.274087	0.2053	-0.102035	-0.0565039	-0.0580749	0.611935	-0.00619965	0.194125	-0.119675	-0.329787	1.37313	-0.191932	0.361499
TCGA-AX-A06J	30.4333	0	71	3	1	0.146985	-0.253922	-0.260042	-0.184852	0.764091	0.169224	0.0199595	-0.319906	2.13403	1.79382	-0.106517	-0.369173	0.814644	0.0415451	0.301823	0.24532	-0.11284	-0.283439	-0.0374892	0.0452737	0.928734	-0.0761383	-0.0185313	0.221936	0.0706911	0.167354	0.124794	-0.0280486	0.0287269	-0.232916	-1.32604	0.373366	0.962685	-0.273202	-0.0145069	0.175846	0.0793938	0.0801989	-0.15408	2.73185	-0.0685235	-1.08167	-0.0518007	0.251795
TCGA-AX-A05U	30.0667	0	56	1	1	0.227789	-0.198384	-0.465539	-0.525572	0.590353	-0.153514	-0.0560472	-0.255645	1.24759	0.85595	-0.164334	-0.611705	0.851242	0.0817004	1.08765	0.459955	0.0280693	0.44306	-0.106637	-0.0168394	0.646069	-0.0188117	0.364627	0.086085	-0.207572	0.19907	0.121689	0.0283699	0.0919807	-0.471194	-1.61494	0.120924	0.014409	-0.0951832	0.0220735	0.0267828	0.243766	0.263085	-0.143382	1.3603	0.0295159	-0.590633	-0.07311	0.700659
TCGA-AX-A063	60	0	63	2	1	-0.0618378	-0.467702	0.339747	-0.0681411	0.460209	-0.0655509	-0.208448	0.0214519	2.06471	1.74632	0.07749	-0.270229	0.392472	0.271836	0.0598596	0.41613	-0.398335	0.35808	-0.125948	-0.196579	1.22565	-0.231396	-0.170759	0.046091	-0.493991	0.0897001	-0.486941	-0.213807	0.148817	0.751459	-1.43527	0.032134	0.481777	-0.214584	-0.123327	0.0867855	0.51485	-0.193011	-0.00654441	0.811178	-0.28358	-0.687956	-0.143658	-0.113059
TCGA-AX-A06L	60	0	63	1	1	0.102986	-0.646015	-0.271752	-0.0705545	0.614817	-0.00125403	-0.0312388	0.0387106	1.46874	1.61233	-0.0437204	0.0802115	0.608019	-0.196814	1.37747	-0.450882	0.238137	0.33685	-0.303238	-0.113492	-1.52772	-0.217478	0.204256	0.186116	0.107186	0.0113455	0.0492411	0.146773	0.085049	0.512437	-0.524937	0.182989	-0.095538	-0.0588923	-0.0645428	-0.0246842	0.394237	-0.0723308	0.275082	-0.305843	0.132154	-0.301445	-0.285835	1.10122
TCGA-AP-A05N	24.2	1	58	1	1	0.281246	-1.34726	-0.300494	-0.703318	0.241835	-0.286646	0.413055	-0.3641	0.391525	0.395865	0.188282	-1.0688	0.0762633	-0.0210199	-0.127672	0.760092	0.555567	0.697923	-0.113935	0.206706	-1.42592	0.164846	0.358487	0.00435468	0.195825	0.398755	0.154394	0.101784	0.155626	-0.0824379	-1.25299	0.280851	1.04427	0.2277	0.143039	-0.0649504	0.565337	0.317175	0.109395	-0.0204364	0.102154	0.132055	-0.00335442	0.444424
TCGA-AP-A05P	21.2	0	54	1	1	0.317668	-0.260617	-0.313795	-1.77037	0.602548	-1.1286	-1.04274	-0.00610359	-1.20861	-1.09437	0.137288	-0.0101555	0.60498	0.0159233	1.26483	0.55939	0.22519	1.43342	0.0366667	0.102303	1.29743	-0.132367	0.378639	0.0364403	-0.109807	0.0789512	-0.04456	0.0188349	0.125667	0.725898	-0.727532	0.651306	0.636562	-0.29109	-0.145028	-0.0899636	0.107597	0.0668777	0.0566061	1.66276	0.0145791	-1.39476	-0.0762417	-0.232063
TCGA-AP-A059	8.33333	0	69	3	1	0.207903	-0.0734744	0.14476	-0.69089	0.363021	-0.593104	-0.693851	0.187979	-1.20449	-0.850391	0.333393	0.836433	0.831665	0.173658	-0.187894	0.0259864	0.632563	0.114523	0.223366	0.112892	0.123466	0.034221	0.153906	-0.249758	-0.242952	0.223326	-0.152405	0.173792	0.0245563	2.02488	0.382306	0.220996	-0.0629806	0.229477	0.183635	0.165553	0.540552	-0.0784774	0.140351	1.03235	-0.173504	1.2493	-0.0521599	0.109107
TCGA-AP-A056	60	0	64	3	2	0.0647737	0.200642	0.0627614	-0.367702	0.000648062	-0.443125	-0.0777841	-0.638524	-0.104592	-0.100965	-0.0940486	0.316844	-0.163964	1.93946	-0.71271	0.582767	0.499934	-0.530703	-0.268329	-0.0146888	-0.604018	-0.24948	0.628015	-0.0362961	-0.404717	0.177454	-0.108851	0.523541	0.00444536	1.2261	-1.81969	0.0322274	-0.116368	0.233243	-0.106462	-0.302051	0.548234	0.020215	0.110708	0.940746	0.031388	1.75374	-0.271543	1.3285
TCGA-AP-A05O	12.3667	0	68	3	1	-0.0996112	-0.261208	0.0174803	-2.01657	0.115692	-0.755191	-0.163868	-0.15604	-1.09647	-0.366803	0.427649	0.591017	0.0908257	-0.5369	-0.639116	-0.322698	1.06387	0.40857	0.255432	0.127762	-0.130086	0.0677347	0.431903	-0.540838	0.637107	-0.0728432	-0.173258	0.0485575	-0.213133	1.53292	2.01535	-0.0359267	-0.501875	0.138422	-0.223738	-0.20599	0.243431	-0.389542	-0.0897574	-0.237662	0.674343	0.240879	0.0811722	-0.218368
TCGA-B5-A0K7	17.3	0	64	1	1	0.274052	-0.320971	0.0163092	-0.395576	0.599662	-1.13995	-1.36122	-0.891043	-0.170384	0.0525753	0.201178	-0.0200504	-0.0717734	-0.67487	0.0399363	-0.0550832	0.185609	1.38839	0.0124766	0.29829	-0.686662	-0.0363055	1.49496	0.246449	0.615565	0.136051	0.294493	-0.305606	0.00949593	1.10423	-0.476312	0.365419	0.536342	-0.151753	-0.0120846	-0.123157	-0.108474	-0.0116915	-0.277764	0.0460802	0.414643	-0.45938	0.103404	-0.207571
TCGA-BK-A0C9	12.8667	0	57	1	1	-0.228866	0.0939887	0.082458	1.00397	0.65337	-0.393584	-0.864403	-0.102532	2.63666	2.48018	-0.0287057	-0.586655	0.316201	-0.261092	-1.03336	-0.195991	0.308963	-0.310952	-0.236688	-0.294394	1.34029	-0.425818	-0.180995	0.0231697	-0.587869	-0.211435	-0.543153	-0.42173	-0.0509504	0.243529	0.176696	-0.537998	-0.0287911	-0.0445159	-0.282476	-0.0798759	0.461173	-0.414417	-0.111908	0.310296	-0.130542	0.419053	-0.163895	-0.0927271
TCGA-AX-A0IS	35.5	0	52	2	1	0.158236	-0.0906489	0.317564	0.251779	0.257183	0.339702	0.224942	0.021948	2.46889	1.64909	0.631171	0.691218	0.0551344	-0.11308	0.381791	0.616098	0.345566	0.831937	0.0185514	-0.149499	0.247353	-0.0693757	0.572637	0.53548	1.1036	0.273591	-0.210055	-0.0347759	-0.0559813	0.452451	-1.23768	-0.0418223	0.805708	-0.0790426	-0.11528	0.262895	0.584705	0.165791	0.127239	-0.100873	-0.227923	0.763202	0.0128904	-0.696615
TCGA-AX-A0J1	60	0	80	2	1	-0.101319	0.187995	0.112088	0.228009	0.025952	0.440052	0.47	-0.243747	2.12158	1.66054	0.00783173	-0.42468	1.02082	0.307995	-0.886393	0.530853	-0.697077	0.0206127	-0.258282	-0.17092	1.14232	-0.261529	-0.0279282	0.255745	-0.545045	0.233852	-0.297089	-0.214313	0.0484886	0.211383	-1.24797	-0.122238	0.232212	-0.238098	-0.356033	0.0296765	-0.102859	-0.260789	-0.382401	0.599912	-0.268952	0.385187	-0.341643	0.0467861
TCGA-AX-A0J0	40.6333	0	47	2	1	0.011618	0.271902	-0.0595284	0.293421	0.818199	-0.00109823	-0.0327602	-0.0740442	2.1695	1.60147	-0.0541417	0.153705	0.504608	0.961407	-0.0272863	-0.252294	-0.151475	-0.741173	-0.0529578	-0.0724493	-0.625013	-0.130764	0.917371	0.612906	0.151706	0.109668	0.328183	0.228826	0.0488085	1.45886	-1.45688	-0.170262	-0.40418	0.594922	0.0716115	-0.0836214	0.204143	-0.147052	-0.150008	0.770916	-0.0297929	1.92255	-0.200805	0.834744
TCGA-B5-A0K2	26.2667	0	54	1	1	0.182902	-0.174762	-0.152921	-1.03702	0.399627	-0.93195	-0.584901	-0.735561	-0.612042	-0.272018	0.212193	-0.776951	0.314837	0.487816	-0.927594	0.373566	0.574834	-0.457946	0.612154	-0.0671637	0.879085	0.480303	-0.0389807	-0.233364	-0.0229824	0.311103	0.538399	0.216747	0.240754	0.705548	-0.925891	-0.0488678	-0.447008	0.10135	0.429233	0.0750714	-0.601438	0.191377	-0.140546	1.23243	0.317636	-1.13833	0.260459	0.567619
TCGA-B5-A0K3	27.6333	1	62	3	1	-0.20326	0.139423	-0.0824994	0.0192871	0.0672537	-0.368293	-0.51943	0.18142	0.0627297	0.490165	-0.398185	-0.772221	-0.627707	0.0145342	-0.563878	-0.188062	-0.128165	-1.14836	0.341353	-0.294833	-0.00633049	-0.294049	0.430508	0.0670337	-0.702624	-0.0827644	-0.0554458	-0.607982	-0.374522	-0.553411	-0.125227	-0.330631	-0.189657	0.248371	-0.127807	-0.241312	0.917985	0.225584	-0.175322	3.27303	-0.135922	1.76887	-0.0574899	1.26606
TCGA-B5-A0K4	18.1333	0	51	2	1	0.177888	-0.802949	-0.354761	-1.19367	-0.432222	-0.580391	-0.565698	-0.680097	0.0723524	0.398104	-0.800715	-1.48062	-0.166299	-0.0130743	-0.889918	-0.311211	0.706045	-0.778901	0.693972	0.12193	-0.208989	1.09842	-0.856583	0.13437	0.164746	0.246544	1.14791	0.180498	0.245655	0.00906281	0.5828	1.71064	1.35184	0.530788	0.504923	-0.19335	-0.384983	0.251225	-0.510415	1.51051	0.584811	-1.46553	0.811058	-0.112405
TCGA-A5-A0GX	60	0	53	2	1	-0.125763	-0.770734	0.705795	-0.000554192	0.415073	-0.441433	-1.07734	-0.0365138	1.36724	1.21611	0.427549	0.067323	1.04978	-0.298196	-0.221719	0.00558316	0.143899	0.794955	0.0391208	-0.226695	0.725169	-0.0417583	-0.133081	0.411331	0.783986	0.00820059	-0.0661926	-0.0854651	-0.0152228	0.32326	1.91972	-0.132604	0.0817332	0.0328483	-0.225888	0.488112	-0.651722	-0.43925	-0.249605	-0.557203	0.217794	-1.7102	-0.113216	-0.578543
TCGA-A5-A0GW	23.5333	0	46	3	1	-0.0519636	0.212564	-0.238462	-0.156609	0.464416	0.132177	0.0193747	-0.791862	0.556363	0.6833	-0.467362	-1.046	-0.603622	-0.0394163	-1.0529	0.495059	0.184361	0.163503	-0.00733557	-0.201078	-0.904674	-0.179095	0.270969	0.125126	-0.411821	0.125971	0.398715	-0.0545624	-0.146073	0.67277	-0.146829	0.0627061	-0.268476	0.209568	-0.0245188	-0.0252821	-0.00666862	0.2548	-0.329584	-0.068655	0.282755	1.14476	0.0823822	0.481809
TCGA-A5-A0GB	33.2333	0	65	3	1	-0.269762	-0.442628	0.27661	0.447443	-0.0102707	0.279775	-0.134446	-0.318389	1.68485	1.50994	0.369221	-0.635161	-0.61144	-0.117564	-1.44349	-0.143458	0.165977	-0.815067	0.0958242	-0.332354	1.03076	-0.368591	-0.569652	-0.107751	-0.461217	-0.359029	-0.534823	-0.354451	-0.392799	1.42899	0.32475	-0.249532	-0.075022	-0.316962	-0.316156	0.0917107	-0.347921	-0.471172	-0.323391	1.28768	-0.323382	-0.85637	-0.222367	0.532231
TCGA-A5-A0GV	21.1	0	67	1	1	0.133657	-0.260617	0.312217	0.382001	0.741081	-0.340683	-0.532202	-0.749775	0.850489	0.862152	-0.104803	-1.28536	0.041008	-0.843938	-1.65002	0.571535	0.411404	0.325778	0.187471	0.0188703	0.473826	-0.0613761	0.576771	0.137787	0.415531	0.204624	0.154481	-0.283185	0.0138373	-0.0800602	-1.30528	-0.0703324	0.634152	-0.101285	-0.102017	-0.0681137	0.257772	0.00618273	-0.40819	1.11028	0.0901363	0.0979129	0.26509	1.11669
TCGA-A5-A0G9	60	0	79	3	1	0.185607	-0.280055	0.346115	0.0594636	0.643652	-0.277636	-0.287114	-0.212998	1.74488	1.65887	0.148083	-1.93974	0.253617	0.27967	0.534371	0.328619	-0.427462	0.561102	-0.205147	0.332199	0.685698	-0.115046	0.399009	0.0776227	-0.337019	0.196328	0.211206	-0.0221471	-0.0633086	-0.439782	-1.45495	0.134264	0.281028	-0.020688	0.0948361	-0.0604733	-0.220424	0.0303149	0.0676761	1.20231	0.0339056	-0.71896	-0.110395	0.799743
TCGA-A5-A0GR	37.3333	0	69	2	1	0.117967	-0.72197	0.0890424	-0.503601	0.334707	-0.155553	-0.0218803	-0.256598	0.682545	0.955043	0.360027	-1.77301	-0.38795	0.0133248	-0.407019	0.459643	0.320641	-0.711286	-0.196429	-0.0235609	-0.411748	0.0677282	0.0572964	-0.00379069	-0.159154	0.26952	0.202638	0.220904	0.102278	-0.439988	0.576387	0.482475	0.0417075	-0.22787	0.0209933	-0.214446	0.0423436	0.108395	-0.314916	1.75342	0.159727	-1.26004	0.0146544	3.12213
TCGA-A5-A0GU	28.6333	0	58	1	1	0.136691	0.0939523	-0.00232317	-0.844688	1.18665	-0.459836	-0.343208	-0.296816	0.178789	0.218033	0.231671	0.603928	0.699995	-0.146585	0.472377	0.638447	0.786495	-0.178277	-0.0305027	0.00294515	-0.49274	-0.118423	0.247373	0.339442	-0.343383	0.239362	-0.407421	-0.107562	-0.046136	0.846725	-1.3174	-0.0280882	0.190145	-0.197444	-0.140149	-0.039667	0.668511	0.027624	0.166878	1.51855	-0.004815	-0.812928	-0.0243942	1.00307
TCGA-A5-A0GD	60	0	75	2	1	-0.105487	-0.144795	-0.393807	0.0311598	0.984882	0.365989	0.295968	-0.790474	2.28721	1.99062	0.403667	0.639432	0.529653	-0.382768	-0.919745	0.41964	0.285878	-0.750227	-0.282757	-0.0573314	0.797073	-0.320929	0.0601577	0.531907	-0.58169	0.0152081	-0.566889	-0.0386306	0.000949457	-0.0813583	0.00326692	-0.230459	-0.29943	-0.171213	-0.313443	0.062881	-0.0381525	-0.25703	0.0730929	0.876151	-0.492763	0.518406	-0.46961	0.567417
TCGA-A5-A0GQ	38.9	0	76	1	1	0.379783	-0.0718472	-0.216536	0.0575337	-0.0842669	-0.132489	0.204329	-0.905635	1.38242	1.23125	0.721959	1.12956	-0.340688	-0.0488801	-0.0841706	-0.610539	1.01938	-0.150582	0.0289725	0.203689	0.0651783	0.0136003	0.239445	-0.27164	0.0550062	0.015457	0.0693895	-0.3958	0.273279	0.482546	-0.266399	0.144713	-0.183787	0.225796	0.738369	-0.229351	0.694905	-0.0138051	0.407402	1.46187	0.665162	-0.124041	0.0146544	1.27373
TCGA-A5-A0GN	60	0	65	1	1	-0.0622754	-0.992334	0.00448741	0.322934	0.288807	-1.06958	-1.54912	-0.819134	1.52766	1.13792	0.887168	-0.498355	-0.591572	-0.621926	-0.647825	0.129827	0.165221	0.714695	-0.134266	0.0414577	-0.0602244	-0.313519	0.143208	0.134327	0.0220868	-0.11764	-0.123275	-0.230315	0.0868283	0.503974	-0.756521	-0.241949	0.617771	-0.284574	-0.253037	0.128234	0.0823275	-0.157714	0.130359	-0.600152	-0.0814707	-0.494932	0.00582929	-1.01547
TCGA-A5-A0GE	60	0	38	2	1	0.300849	0.371535	-0.373505	0.25899	-0.282848	-0.147674	0.463555	-1.24579	1.01649	1.45978	0.0152093	-0.16367	0.247446	0.209493	-0.616145	-0.550413	0.772262	0.245721	-0.0241618	0.110391	-0.638409	-0.211378	-0.029506	-0.360152	0.341363	0.084236	-0.157495	-0.695148	0.228708	1.51906	1.50516	0.0791704	0.474127	-0.0584712	0.84104	-0.214692	0.443975	-0.0414574	0.398877	1.23332	0.549671	-0.0304969	-0.0982263	1.15463
TCGA-A5-A0GM	60	0	53	1	1	0.0436553	-0.625943	0.0862972	0.947861	0.793727	0.0917152	-0.0790381	-0.193057	1.2112	1.53174	0.446595	-1.14539	0.133042	-0.0975706	0.0020866	0.0821513	0.274473	-0.24175	0.00969026	-0.0502396	1.63167	-0.202797	-0.109023	-0.0448799	-0.328677	-0.0580944	-0.423246	-0.258033	-0.139586	-0.188936	0.101968	-0.107719	-0.154162	-0.300346	0.0699257	0.205256	0.133815	-0.128256	-0.0702866	0.504536	-0.0649321	-0.466278	-0.0671655	0.346754
TCGA-A5-A0GI	58.3333	0	63	2	1	0.219432	-0.41291	0.167824	-0.320807	0.975802	0.319569	-0.0656011	-0.03527	2.57468	2.13756	-0.00391853	0.0900145	0.132532	-0.0081	0.816948	0.615286	-0.151131	0.530258	0.0409116	-0.187392	1.9807	-0.101834	0.388472	0.267974	1.06841	0.225836	-0.382509	0.123481	0.184232	-0.0808024	-1.81467	-0.00626848	0.654889	-0.0756049	-0.0999062	0.404084	0.572257	0.194636	0.372053	1.09773	-0.371412	0.703696	0.0269808	0.0316526
TCGA-A5-A0GH	60	0	57	3	1	-0.245147	-0.0517997	-0.227358	0.0951157	0.723614	0.739243	0.395214	-0.142022	2.03174	1.88349	0.428174	0.30087	-0.829386	-0.164814	-0.465594	0.362411	-0.23552	-0.813344	-0.0224464	-0.412873	1.80915	-0.24441	-0.901327	0.495185	-0.444107	0.0183549	-0.496438	-0.119897	-0.017863	0.751193	-0.378817	-0.381957	0.525541	0.249149	-0.157603	0.10715	0.427462	-0.166706	-0.195387	1.27009	-0.301505	1.3406	0.39336	-0.277937
TCGA-A5-A0GJ	60	0	44	2	1	-0.152568	-0.547669	-0.121294	0.647172	-0.496198	-0.891948	-1.27481	0.330066	1.39106	2.07885	0.465633	-1.20474	0.308673	-0.361432	-1.33483	0.270006	-0.125434	-0.27743	0.291594	-0.143039	1.48027	-0.19903	-0.0676644	-0.112495	-0.193607	-0.0126639	-0.79222	0.286244	-0.107653	-0.236759	-0.237056	-0.0238276	-0.185864	-0.270141	-0.169738	-0.0487702	-0.391545	-0.108395	-0.401984	0.824258	-0.250191	0.0283879	0.0834306	-0.46193
TCGA-B5-A0K1	30.9333	0	69	1	1	-0.198366	-0.0107848	-0.377235	0.0848653	1.42378	-0.436035	-0.672371	-0.908104	2.19756	1.95638	0.299734	0.0305425	0.736169	-0.742219	-0.162659	0.212114	0.224461	-0.912988	-0.235401	-0.381028	1.39868	-0.00403869	-0.115918	0.270131	-0.314213	-0.113475	0.0150681	0.0919203	0.0667739	0.202488	-1.18122	-0.387055	-0.490631	0.0600556	-0.199026	0.0712193	0.22096	-0.221786	-0.0841059	1.53602	-0.287321	-0.395716	-0.334358	0.67667
TCGA-B5-A0K0	28.7333	0	48	1	1	0.112928	-0.584137	0.157191	-1.16927	1.32069	-0.847122	-0.596271	0.129791	-0.867443	-0.755587	0.200009	0.430231	0.334762	-0.26481	1.1894	0.468536	0.11946	0.772613	-0.23378	-0.0642161	0.0513868	-0.370297	0.33922	-0.190944	-0.00324922	0.15683	-0.440763	0.314294	-0.0743367	2.20855	-1.30421	0.103127	0.77327	-0.422785	-0.0370382	-0.21679	0.187887	-0.0637077	0.193236	0.75256	-0.258752	-0.382606	-0.202991	-0.681581
TCGA-AP-A0LT	49.9	0	57	2	2	0.0494395	0.607547	-0.171318	-0.265005	0.426385	0.388346	0.688238	-0.169084	1.33824	0.935811	0.0109916	-0.312036	0.0508259	-0.151858	-1.38876	0.583385	0.238211	0.277179	0.189068	-0.23712	1.24601	-0.225471	0.619806	-0.130013	-0.467572	0.113087	-0.378003	-0.215579	-0.12403	0.631782	-0.630901	-0.214521	0.162209	-0.0500748	-0.0251623	-0.388787	0.240237	-0.132094	-0.0436626	0.814683	-0.254764	1.42409	0.268119	-0.198087
TCGA-AP-A0LP	60	0	76	1	1	0.125479	-0.403551	-0.0947527	-0.0870458	0.774078	0.00570846	-0.355721	-0.109248	2.5866	2.00783	0.132004	0.278412	0.255604	-0.445858	0.105908	0.604728	-0.263498	-0.605456	0.0788327	-0.00708079	0.936117	-0.177024	-0.38615	0.249936	-0.428412	0.0753828	-0.331717	-0.279772	0.0136299	-0.248685	-0.303026	-0.00905507	-0.504113	-0.111292	-0.17951	0.0849896	0.0540135	-0.115963	0.0198375	0.673592	-0.00704091	-0.888922	0.232185	-0.0165399
TCGA-AP-A0LN	60	0	56	1	1	0.358846	0.114275	-0.167865	-1.63281	1.23265	-0.921126	-0.436535	-0.141254	-1.1268	-0.876384	0.364658	1.09699	0.576086	-0.200257	0.698822	0.392044	1.45811	0.670678	0.446467	0.0767503	0.177679	0.110096	1.00053	-0.190622	0.0369206	0.378556	-0.300919	0.14834	0.0378315	0.379947	-1.38761	0.00498808	1.12332	-0.0909346	0.126161	0.0338852	0.494994	0.023836	0.34339	0.486697	0.163253	-0.791637	0.37619	0.546201
TCGA-AP-A0LL	60	0	56	1	1	0.0667487	-1.20508	0.302193	0.458773	0.643699	0.00359944	-0.315465	-0.226425	2.09244	1.81906	0.723705	0.023028	0.562709	-0.564639	0.342075	0.655781	0.324974	1.16101	0.0613166	-0.0202418	0.571976	-0.0134115	0.777141	0.0426897	0.274094	0.213098	-0.383779	-0.055428	-0.128055	-0.233069	-1.38083	-0.0601513	0.524628	-0.196809	-0.0678124	0.0937891	0.529074	-0.0898267	0.0224808	-1.0106	-0.11542	-0.492633	0.0934092	-0.826838
TCGA-AP-A0LJ	32.1667	0	42	1	1	0.152469	-0.481985	-0.613878	-1.39066	0.955533	-1.12015	-0.12329	0.00141775	-0.582332	-0.602182	0.156922	0.498675	1.06607	-0.482621	1.19008	-0.173599	0.481683	0.678273	-0.141453	0.0521121	-0.176309	-0.0802867	0.357767	0.0710784	0.294117	0.113665	0.0283334	0.308157	0.0635359	1.03486	1.4104	0.357025	0.29864	-0.0310062	-0.0893605	-0.20866	0.156158	-0.101498	0.120003	0.258281	0.0638118	-0.882729	-0.176513	-0.0932199
TCGA-AP-A0LG	60	0	54	3	1	0.37095	-0.02427	-0.152147	-1.39517	0.245763	-0.232847	0.362221	-0.212571	-0.405958	-0.763376	0.483666	0.780896	-0.172608	-0.234157	0.144159	0.821344	0.662683	0.669422	0.20278	0.324662	0.703892	0.0405191	0.76395	0.0186317	-0.0423788	0.344873	0.114783	0.105434	0.0962025	0.203915	-0.483263	0.11307	0.708841	0.132772	0.0313152	-0.270228	0.0919425	0.125734	0.421144	0.418308	0.185726	1.50479	0.305587	0.536503
TCGA-AP-A0LE	60	0	57	3	1	0.12097	-0.503714	-0.0682405	-0.535822	0.505359	0.040986	0.344101	-0.0750581	0.889202	0.72679	0.141563	-0.46434	-0.589132	0.380909	-0.430967	0.722951	-0.133623	0.485641	-0.0776969	-0.0823657	-0.926495	-0.136033	0.206703	-0.0922546	-0.204322	0.312915	-0.111036	0.104249	0.0448675	-0.651645	-1.0225	0.0708459	1.1306	0.0159802	0.0620182	-0.200192	0.627534	0.0445958	0.168032	0.61972	-0.121283	1.62336	-0.0406581	-0.0346897
TCGA-AP-A0LD	60	0	63	3	1	-0.0201929	-0.628758	0.123376	0.762349	0.842427	0.552752	0.636219	-0.120079	1.25874	1.51757	-0.215834	-0.813755	-0.763336	0.845176	-0.657715	0.527031	-0.231398	-0.596302	-0.358255	-0.176738	0.624926	-0.257449	-0.264736	-0.221777	-0.477949	0.173089	-0.181919	0.181712	-0.0864086	0.184619	-1.28703	-0.0220128	0.293569	0.0162783	-0.0784544	-0.216247	0.512864	-0.129181	-0.178628	0.0195127	-0.313346	1.33348	0.954599	-0.225248
TCGA-AP-A0LV	25.4333	0	39	1	1	0.189254	-0.107988	-0.236851	-0.596431	0.94667	-0.240809	0.771184	-0.0834847	0.095899	0.0518354	0.213469	0.724861	1.17607	0.455311	1.44465	0.131101	0.335253	0.489567	-0.259397	0.093811	0.106288	-0.0954837	0.695473	-0.158688	-0.0203191	0.190008	-0.557365	0.215531	0.0245444	0.609044	-0.695474	0.0328226	0.798472	-0.0938704	0.0552493	-0.0695995	0.402797	-0.0695737	0.192076	0.405428	-0.103119	0.434961	-0.102733	0.674103
TCGA-B5-A0JT	43.7333	0	63	1	1	-0.125272	-0.0476616	0.11481	-0.01384	0.371999	-0.0790402	-0.310683	-0.275638	0.400038	0.672227	-0.0545818	-0.606727	1.05312	-0.168527	0.748115	0.346091	-0.247262	0.312911	-0.364174	-0.0405235	0.179153	-0.316442	0.0800521	0.185903	0.113784	0.0333035	-0.239126	-0.21448	-0.083276	-0.631457	1.34764	0.0123853	0.00221239	0.0333105	-0.162985	-0.0596728	0.0970378	0.0437687	-0.2447	-0.062354	0.554787	-0.605767	-0.273725	-0.106179
TCGA-A5-A0GG	60	0	76	1	1	-0.107746	-0.313726	0.355267	1.07811	1.0253	1.27354	0.982111	-0.00028017	1.26522	1.14657	0.0003283	0.538568	1.93524	0.6832	0.696621	0.324208	-0.0780316	-0.40997	-0.370585	-0.217179	0.599629	-0.240164	0.279285	0.0620315	-0.453586	-0.0672525	-0.58493	0.338743	0.154907	-0.623411	-0.191162	-0.196508	0.122821	0.171845	-0.129617	0.181527	0.446284	-0.0224561	-0.175322	0.667478	-0.39117	0.621731	-0.356997	0.794653
TCGA-BG-A0LX	20.4333	0	57	2	1	0.180362	-0.322597	-0.204	-0.939975	0.144649	0.411321	0.506339	-0.0638634	1.76535	2.07844	-0.290829	-1.11402	1.41907	0.193275	-0.123547	0.341836	-0.255348	-0.344798	-0.160669	0.00637863	1.00675	0.0958249	0.317871	-0.173639	-0.13613	0.113761	-0.0555242	-0.0740945	0.0744974	0.217237	-0.495352	0.619753	0.267611	0.0475768	0.0827537	-0.169596	0.550457	0.111188	-0.127335	2.23028	-0.0262926	0.448901	0.580454	0.746237
TCGA-BG-A0M0	19.5667	0	66	1	1	0.245705	0.352146	-0.137346	-0.771051	-0.203446	-0.173826	0.1074	-0.0634844	0.642325	0.677203	0.649636	1.1014	0.762461	0.451355	1.2337	-0.317988	0.517394	-0.0515805	-0.113245	0.109234	1.03961	0.286231	0.0280265	-0.0767008	0.107919	0.157471	-0.152027	0.183514	0.274973	0.802265	-0.0152954	0.236351	0.157186	-0.238592	0.441878	0.0627873	0.777357	0.179759	0.317978	0.419711	-0.0129661	-0.708792	-0.0414666	0.884729
TCGA-BG-A0M2	21.2	0	62	2	1	0.228703	-0.52799	-0.322749	0.0926896	0.120896	-0.105068	0.0127896	-0.157334	1.07373	1.18077	0.110231	-1.85289	1.18053	0.185661	0.622864	-0.221571	-0.133695	-0.569508	0.302729	-0.16964	1.92029	0.19906	-0.115073	-0.183216	-0.321436	0.0961814	0.615487	-0.26311	0.140553	-0.039233	-1.27111	-0.0205984	0.401037	-0.0997059	0.169119	0.0650612	1.07824	0.0237802	-0.0651585	0.0104341	-0.000664207	-0.862326	0.0646632	2.61736
TCGA-BG-A0M3	35.7	0	74	2	1	0.0577145	-0.627921	-0.00939518	-0.35292	0.765345	0.522785	0.181171	-0.00248299	2.84734	2.49128	0.749331	0.876681	0.552703	0.302319	1.11305	0.640394	0.0833421	-0.0365041	-0.271572	-0.016462	-0.337565	-0.0962721	0.42281	-0.0002556	-0.383458	0.204689	-0.36014	0.093005	0.283642	-0.700961	-1.7801	-0.0523273	-0.540339	-0.0882836	-0.00749254	0.0376237	1.01576	0.153128	0.355766	1.75675	-0.473184	0.565482	0.200697	1.23654
TCGA-BG-A0M4	35.4667	0	60	3	1	0.0631033	0.77531	0.273574	0.205715	0.643914	0.520108	0.303189	-0.292727	2.05417	1.87788	0.450551	0.576392	-0.459407	1.43307	0.728499	0.144414	-0.185559	-0.423267	-0.287672	-0.124033	0.598607	-0.262607	-0.42872	0.299889	-0.453989	-0.00332164	-0.183577	0.115544	0.265066	-0.803714	-1.49972	0.178352	0.117941	-0.257948	-0.128611	-0.122271	-0.183123	-0.00142731	0.00504809	2.23955	-0.427572	-0.360128	-0.340364	0.665133
TCGA-BG-A0LW	18.8333	0	47	2	1	0.161636	-0.364807	0.349383	-0.302855	1.44957	0.368884	0.105897	-0.230487	0.692305	0.523906	0.707183	0.947483	0.061541	-0.24275	0.987184	-0.142081	0.250287	0.153724	0.0232741	0.132001	0.0911209	-0.118818	0.387916	-0.0944847	0.225293	0.0693327	-0.62692	0.0509499	-0.0253274	1.24663	-0.352402	-0.0401242	-0.0786583	-0.225986	0.47973	0.0186363	-0.193794	-0.0696101	0.172522	1.52021	-0.511596	-0.221425	-0.0520138	-0.202977
TCGA-BG-A0M8	37	0	50	3	1	0.0680664	-0.0636348	-0.235028	1.01293	-0.295641	-0.815812	-1.06885	-0.585703	0.920768	1.33823	0.744569	-0.75034	1.03637	-0.0673244	-1.42206	0.173791	-0.0384832	0.0218525	0.240083	-0.0261586	1.16648	0.0557902	0.293501	-0.31859	-0.36974	-0.091864	-0.492665	0.13261	-0.0837515	2.19224	1.17887	-0.0308826	-0.223455	-0.257456	-0.202372	-0.0181128	-0.405856	-0.173217	-0.448664	-0.0491872	0.071857	-1.48551	0.061654	0.0363885
TCGA-BG-A0M9	28.6667	0	73	2	1	-0.126722	-0.480414	0.0840607	-0.0407212	0.545109	0.00187495	-0.644432	-0.192451	2.8181	2.41142	0.613988	0.128995	0.243195	-0.0933103	-0.471877	0.263011	0.322197	-0.493743	0.249723	-0.384993	1.53335	-0.0515139	-0.58246	-0.139429	-0.443818	-0.114942	-0.371988	-0.258565	0.0790367	-0.787691	-0.181148	-0.434027	-0.0942947	-0.266839	-0.145288	0.220188	-0.0541655	-0.388262	-0.185001	0.555647	-0.283581	-1.08826	0.0267183	0.67667
TCGA-BG-A0MC	42.1	0	74	1	1	-0.108039	-0.996291	-0.169805	-0.224857	0.643106	-0.358295	-0.950739	-0.391074	1.01702	1.13666	0.623235	0.151779	0.606927	-0.847177	-0.775082	0.343978	0.380239	-0.0353403	0.35037	-0.169575	1.12959	-0.0923174	-0.469741	-0.0246192	-0.489767	-0.00865015	-0.426241	-0.121077	-0.0582257	-0.620051	-0.380933	-0.424036	-0.68531	-0.325125	-0.0960986	0.390257	-0.0517972	-0.229855	-0.478295	1.25	-0.23272	-1.07424	-0.056449	-0.0507217
TCGA-BG-A0MG	49.2333	0	73	1	1	0.0920744	-0.2736	-0.231017	-0.109268	0.115184	0.368485	0.292554	-0.239037	1.89283	1.7901	0.140658	0.382856	0.49759	0.0898651	0.521835	-0.531514	0.56101	-0.511349	-0.0879754	-0.257233	-0.438986	-0.27718	-0.420274	-0.172515	-0.386388	-0.0366101	-0.33368	-0.46629	0.24818	1.48358	-0.34744	-0.27551	-0.327067	0.231564	0.387367	0.0216482	0.840797	-0.195419	0.304847	1.20071	0.13484	0.719271	-0.32093	1.63571
TCGA-BG-A0MH	44.7	0	61	2	1	-0.410258	0.311138	-0.0470572	0.392445	0.321518	0.125938	-0.424801	-0.539301	0.794982	0.737524	0.259809	0.0589398	-0.0115359	1.22595	-1.06979	-0.10697	0.901382	-0.986527	0.16192	-0.485969	1.6471	0.0425108	-0.843227	-0.427567	-0.55934	-0.21843	-0.22755	-0.249994	-0.112652	-0.0952332	-0.391275	-0.604831	-0.734054	-0.115711	-0.0262432	0.285314	-0.150405	-0.449197	-0.256675	1.7614	-0.576141	0.117464	-0.206651	0.681336
TCGA-BG-A0MT	21.4667	0	64	2	1	0.19285	-0.140245	0.0176844	-0.220572	1.57957	-0.615627	-0.118206	-0.426354	-0.26314	-0.730337	-0.140135	-0.531937	0.610966	0.775146	-1.88548	0.72181	0.699731	-0.683445	0.107084	0.0711296	1.08252	-0.0384515	1.15273	-0.081296	-0.31173	0.360011	-0.263884	-0.0504266	0.0413515	-0.318604	-0.669951	0.0302899	-0.00436605	-0.0505232	-0.0437791	-0.0619353	-0.0202844	-0.0093289	-0.187933	1.12766	0.11524	0.369602	0.295783	1.55624
TCGA-A5-A0R8	19.8333	0	81	2	1	0.215379	-0.828898	-0.242609	-0.314209	0.622032	-0.101833	-0.120721	-0.486684	0.736046	1.14075	0.0791622	-0.256229	-0.178042	-0.485668	-0.105328	-0.590032	0.907183	-0.125732	0.290177	-0.132712	0.0631238	-0.124375	-0.105011	-0.394603	-0.123819	-0.169748	-0.407111	-0.136668	0.0144375	0.647889	0.556071	0.037598	-0.111355	-0.0884811	0.132061	-0.380983	-0.017136	-0.251627	0.0855799	0.214126	0.00695905	0.0378232	-0.175981	1.18549
TCGA-A5-A0RA	29.4333	0	68	2	1	0.191266	-0.339438	-0.0234069	-1.45031	0.626023	-0.645452	-0.243854	-0.193221	-0.18991	-0.206755	0.535139	0.23848	0.526307	-0.324675	-0.784803	-0.248637	0.385232	0.447695	0.433829	-0.0206639	0.749554	-0.108604	0.397498	-0.489341	0.0826253	-0.116002	-0.400257	-0.246488	-0.0436252	-0.0714015	1.11984	-0.209241	-0.408203	-0.146778	0.166204	-0.214842	0.00584349	-0.342279	-0.128535	1.14603	0.148345	-0.51893	0.0500524	0.827739
TCGA-BG-A0RY	15.6333	0	68	2	1	-0.107567	-0.846638	-0.0541861	0.00983548	0.888215	-0.320715	-0.310531	-0.515336	0.234465	0.183319	0.234645	-0.0545346	0.280681	-0.0300057	-0.896023	0.289562	0.234314	0.0503652	0.182026	-0.11665	0.974371	-0.227189	0.414448	-0.157414	-0.610135	-0.0988801	-0.478329	0.0541935	-0.233663	-0.828277	-1.27895	-0.316144	0.245195	-0.272333	-0.261297	-0.345015	0.223139	-0.323291	-0.290091	1.29767	-0.24191	-0.293663	-0.0794091	1.40037
TCGA-BS-A0TD	60	0	65	1	1	0.126272	-0.207299	0.175843	0.105243	0.484753	0.741739	0.228939	0.0324338	1.85878	1.31263	0.499961	1.09804	-0.106037	0.57311	0.98201	-0.0432903	-0.0909339	-0.132048	-0.189593	-0.0678546	0.73714	-0.190981	-0.0960703	0.095739	-0.371151	0.00401431	-0.618204	-0.0325835	0.0899702	1.83226	1.73177	0.0967847	-0.224355	-0.0498165	0.00835763	0.258377	0.188606	0.0244183	0.224231	0.810499	-0.174428	0.525719	-0.259186	1.32823
TCGA-BS-A0TC	60	0	69	1	1	0.157995	-0.243641	0.138662	0.2453	0.95788	0.790059	0.552874	-0.0224689	1.42754	0.967773	0.303449	0.422799	1.24958	0.262753	0.88596	0.320738	-0.393892	-0.824279	-0.0674393	-0.145424	0.345323	-0.0559512	-0.51201	-0.123436	-0.362045	0.137469	-0.623191	0.025437	0.225597	-0.515275	-1.49487	-0.0673101	-0.154391	-0.366681	0.0317031	0.210199	-0.0524276	0.0487091	0.0025834	1.47585	-0.317392	-0.604959	-0.20555	-0.00175551
TCGA-BS-A0TG	60	0	60	2	1	0.015896	-0.537657	0.263249	0.00609304	-0.575782	-0.354413	-0.55217	0.188367	0.914653	0.440054	0.0759796	0.437323	0.0609082	-0.558481	0.414133	-0.614615	-0.145292	0.489384	-0.351269	0.0335574	-0.459059	-0.164943	-0.329969	0.319762	0.330327	0.0270326	0.382586	-0.289439	0.179663	0.759943	2.23661	0.318617	0.0433258	0.610156	0.0172809	-0.105294	-0.440407	0.0195353	-0.0221818	-0.905905	0.656312	-1.49993	0.0716235	-0.208316
TCGA-BS-A0TI	48.1	0	64	3	1	-0.0866888	0.282477	0.0308997	0.858332	0.0458148	1.02245	0.960293	-0.0638074	2.10727	1.84677	0.138518	0.718517	1.28891	1.08668	0.0306718	0.381722	-0.0699112	-0.0216352	-0.361641	-0.110473	-0.789785	-0.245764	0.133918	0.37783	-0.207189	-0.0323811	-0.387142	0.225372	0.0743502	1.52383	-1.49483	0.143395	0.318315	-0.0769014	-0.184746	0.214956	0.918609	0.614731	-0.334011	-0.5729	-0.620707	0.485092	-0.37075	0.92149
TCGA-BS-A0TJ	50.4667	0	59	3	1	-0.0916099	-0.564761	-0.316017	-0.425188	0.388094	-0.00125403	-0.395569	-0.512125	1.75188	1.40101	-0.317292	0.29561	-0.704173	-0.180673	-1.08381	0.278031	0.0450958	-0.491679	0.0487549	-0.262573	1.11641	-0.241326	-0.283513	0.158655	-0.578561	-0.204611	-0.443322	0.064106	-0.0135391	0.527065	-0.00335622	-0.346225	-0.401551	-0.0911882	-0.238301	-0.10628	-0.040351	-0.0449655	0.0170964	1.46067	-0.541284	0.877474	0.285228	0.383239
TCGA-A5-A0R9	24.9667	0	51	2	1	-0.0954612	-0.373341	-0.142361	-0.176021	0.885269	-0.144147	-0.378764	-0.212352	1.22656	1.30986	0.145594	0.255263	0.357121	-0.427749	0.239303	0.280766	0.78328	-0.0971305	0.347591	-0.294129	1.45801	0.102662	0.0561973	-0.134804	-0.16402	-0.0330256	-0.664934	-0.00610426	-0.0549419	0.564666	-0.198135	-0.415488	0.327779	-0.386367	-0.185715	-0.0375593	0.141365	-0.330009	0.181275	0.957737	-0.252576	-0.739158	0.217522	0.114153
TCGA-BS-A0UJ	0.9	0	68	1	1	0.305052	-0.528137	-0.120677	-0.715321	0.597981	0.0259125	-0.222752	0.264805	0.641137	0.274507	0.884129	1.43187	0.0134197	-0.259319	-0.690742	1.01649	1.04084	0.440432	0.413794	-0.0141309	2.1687	0.172349	0.176291	-0.188554	-0.348027	0.288517	-0.554523	-0.00261049	0.0566683	0.00990805	-0.88755	-0.104895	1.03794	-0.277358	-0.0902997	-0.0549941	0.556861	0.011587	0.457974	-0.2751	0.019517	-0.968304	0.0280541	-0.115543
TCGA-BS-A0UF	60	0	65	3	1	-0.00199033	-0.4181	-0.102421	0.19867	0.549212	0.43432	-0.0356655	-0.240415	2.76801	2.25197	-0.0239989	0.132103	-0.929013	1.68151	-0.673644	0.370172	0.40484	-0.875504	0.0324976	-0.17735	0.906649	0.112572	0.00615551	-0.233127	-0.426528	0.010176	-0.600017	0.0269667	0.0477525	1.84815	-0.66817	-0.193087	-0.661267	0.0387299	-0.0259339	0.25183	-0.718493	-0.254819	-0.264519	-0.420822	-0.116903	0.38891	-0.189787	1.16525
TCGA-BS-A0U7	31.1333	1	63	2	1	-0.296404	-0.103711	0.52839	-0.361283	0.0637137	1.08228	0.713664	-0.379646	1.71959	1.30806	0.467811	0.310981	-0.0325256	0.773442	-0.442374	-0.065159	-0.0277885	-0.916695	-0.0215326	-0.396329	1.24324	0.00420947	-0.400364	-0.252472	-0.611586	-0.0713707	-0.411815	-0.111921	-0.0773897	1.00911	-0.325682	-0.432372	-0.121952	-0.149711	-0.0922301	0.0908836	0.0962031	-0.289771	-0.240977	2.41382	-0.449966	0.0415029	-0.137485	-0.0885157
TCGA-DI-A0WH	16.5	0	64	3	1	0.233726	-0.188251	-0.0426706	-1.75262	0.440098	-0.518558	-0.433752	0.00839782	-1.69549	-1.15224	0.107034	-1.59871	0.115681	0.289955	0.477304	0.915145	0.302215	-0.360847	0.353239	-0.0503932	0.218892	0.144071	-0.0200102	-0.262004	-0.0192844	0.341599	0.137623	-0.469418	0.0440147	0.188845	-0.684298	0.0264329	0.913007	-0.310602	0.0376669	-0.103277	0.473811	0.101132	-0.108118	-0.775257	-0.212935	-0.153972	0.236866	0.395455
TCGA-BS-A0V7	47.6333	0	48	1	1	0.208765	-1.31625	-0.135455	-0.69619	-0.150691	0.0128722	-0.314875	0.175454	1.09294	0.852	0.208646	-0.162832	0.39826	-0.296081	1.04241	0.446833	0.513858	0.253774	0.383933	-0.113533	0.527851	0.254301	0.488941	-0.00177472	0.060142	0.0720894	-0.566889	-0.173762	0.0896416	1.55353	0.291334	0.141612	0.297403	-0.280682	-0.069469	0.105991	0.313024	0.144126	0.285378	-0.920085	0.0647649	-1.23125	0.0668215	0.725935
TCGA-A5-A0VO	12.1333	0	64	2	1	-0.151469	-0.0454824	-0.310323	-0.582045	0.6429	-0.0307232	-0.0517955	-0.165594	1.43968	1.46016	-0.151991	0.23556	0.837613	-0.296361	0.274551	0.510978	-0.149434	-0.098756	-0.420948	-0.229955	1.02394	-0.329963	0.155787	-0.0107665	-0.341603	-0.0271839	-0.189913	0.255158	0.0126178	-0.55396	0.484702	0.00240243	-0.418802	-0.0698619	-0.409102	-0.0771622	0.50092	-0.127688	-0.0088354	0.836921	-0.600195	0.319541	-0.45165	1.14994
TCGA-A5-A0VP	42.9	0	74	3	1	0.155087	0.648857	-0.368896	0.190074	-0.227899	0.337764	0.352863	0.113077	2.2859	2.13882	0.45227	0.701408	0.479135	0.711879	0.30899	-0.756994	-0.222298	-0.362829	-0.140347	0.184735	0.766374	-0.169696	-0.0576941	-0.149909	-0.324992	-0.205318	-0.431784	0.0932107	0.216825	0.343972	-1.23814	0.0245029	0.139853	-0.170139	0.275704	0.00676841	0.137647	0.02619	0.104362	0.888161	0.36752	0.120857	-0.260211	2.44293
TCGA-A5-A0VQ	16.1667	0	62	3	1	0.0412034	-0.764146	-0.0298597	0.235599	-0.0306652	0.0573649	0.056807	-0.144413	1.67585	1.60198	0.719522	0.399288	0.155257	-0.213047	1.06184	0.478012	0.179111	0.273934	-0.119929	-0.0496598	-0.0870009	0.00831014	0.0824813	-0.0295958	0.243381	0.120517	-0.196607	0.0696385	0.207563	0.0908171	-1.52491	0.0767952	0.610149	-0.405321	0.00969747	-0.119142	0.177412	0.058586	0.0816005	0.0443242	-0.037353	-1.01537	-0.0793751	-0.368123
TCGA-BG-A0W1	30.2333	0	89	2	1	0.0109689	-0.471262	-0.0335218	-0.240821	0.79709	0.785623	0.56132	-0.0786894	2.63232	2.39839	0.497562	0.672156	1.02147	0.115398	1.28747	0.518094	-0.184131	-0.0475095	-0.206178	-0.0065675	0.982163	-0.35082	0.138949	0.0782508	-0.488219	0.0712429	-0.927102	0.254101	0.230517	-0.961172	-1.05684	0.0187479	0.520541	-0.386128	-0.129154	0.227233	0.60101	-0.082188	0.136569	1.50633	-0.170457	-1.06741	-0.239256	0.373058
TCGA-BG-A0VV	8.66667	0	53	1	1	-0.329811	-0.376521	-0.0394313	0.10713	0.951523	0.77886	0.703887	0.491685	1.92574	1.96187	0.614561	0.986597	1.3346	-0.663147	1.62535	-0.290478	0.429811	-0.385237	-0.202907	-0.636559	1.14856	0.195121	-0.485664	-0.331796	-0.0543975	0.116899	-0.066238	0.368895	0.401098	1.34388	0.778251	-0.770589	-0.453873	-0.143872	-0.136433	0.0429045	0.615232	-0.132249	0.370943	0.727459	-0.859053	-0.208402	-0.426217	0.438566
TCGA-BS-A0U9	58.3	0	59	3	1	0.142068	0.422889	-0.0794951	0.835003	-0.12054	-0.120189	-0.450042	-0.725445	1.16074	0.99318	-0.3391	0.0125338	0.363316	-0.503303	0.264063	-0.327305	-0.133175	-0.596488	-0.567284	0.155291	0.188483	-0.288261	0.269501	0.555174	0.42306	-0.145229	-0.215141	-0.009725	0.104614	-0.589655	-0.698892	0.156823	0.0741592	0.0855651	0.223676	0.101681	0.583678	0.839325	-0.192364	-0.125856	0.444399	1.77311	-0.166228	0.276777
TCGA-D1-A0ZR	0.566667	0	57	2	1	0.0509367	-0.341329	0.0685044	0.0526993	0.303356	0.570301	0.583237	-0.00962845	2.77009	2.6183	0.550884	0.877266	1.01291	-0.18283	0.90343	-0.634981	0.0122982	-0.589795	-0.0443076	-0.14936	0.707719	0.00746993	-0.0689208	-0.380805	-0.146496	-0.177902	-0.527895	-0.077593	0.294576	-0.411399	-0.339788	-0.184275	0.246247	-0.350032	0.240065	-0.181694	0.401631	-0.189073	0.428538	2.04574	-0.0314904	-0.661231	-0.34418	0.254655
TCGA-BG-A0YU	15.0333	0	37	1	1	0.0919025	0.281418	-0.467758	-0.0853909	0.963175	-0.462257	-0.527627	-0.446231	0.925664	0.650067	0.177405	-0.325037	1.37635	-0.544141	0.0464761	0.565858	-0.200948	0.670678	-0.428717	-0.0824266	0.637221	-0.373632	0.661812	0.314379	-0.156486	0.131489	0.273144	0.161218	-0.0562948	-0.938695	0.406818	0.073635	0.179773	-0.0472791	-0.229061	0.205762	0.170019	0.00523106	-0.151587	1.84285	-0.395696	-1.23885	-0.424643	0.268644
TCGA-D1-A102	4.5	0	49	2	1	-0.280203	-0.192018	0.275267	0.0625579	0.945021	0.099927	-0.105426	-0.296327	0.708393	0.520312	0.0004675	0.456073	0.969054	-0.254143	0.558452	0.218648	-0.227721	0.25872	-0.429555	-0.392877	-0.451892	-0.526329	0.852355	0.293145	0.820942	-0.226749	-0.473177	0.177827	0	1.82851	0.117839	-0.282493	0.080145	-0.100496	-0.280928	0.015255	0.00306747	-0.286598	-0.0688266	1.0171	-0.626972	-0.11507	-0.442089	-0.116321
TCGA-D1-A0ZU	29.0667	0	34	2	1	-0.327352	-0.171716	0.406637	0.18153	0.485886	-0.17624	-0.530688	0.0197538	2.33449	2.14798	0.144428	-0.261993	0.0646828	-0.316329	0.191119	0.266307	0.123484	0.259498	-0.0885674	-0.467481	-0.0257198	-0.265579	-0.0576941	0.284499	-0.275556	-0.187807	-0.422253	-0.0899005	-0.0503479	-0.190832	2.0821	-0.409553	0.253586	-0.0244784	-0.274331	0.324408	0.268825	-0.331522	-0.182505	0.834757	-0.506362	-0.510001	0.796963	0.723717
TCGA-D1-A101	1.76667	0	60	2	1	0.362623	-0.809877	0.0212009	-0.400454	-0.95937	0.404707	1.04533	-0.00843195	1.10427	1.52218	0.381835	-0.746762	0.132532	0.0086327	-0.216851	-0.610835	0.505252	0.137443	0.111142	0.20681	-0.729547	0.257312	-0.322954	-0.336908	0.161686	0.240733	0.129094	-0.184024	0.329812	1.58259	0.540618	0.307443	0.637305	0.109159	0.824745	-0.223072	0.221076	0.0337492	0.309514	1.27297	0.420854	0.388949	-0.0503071	0.863418
TCGA-D1-A103	22.3	0	87	1	1	-0.170666	-0.493896	0.0876727	0.086215	-0.626853	0.349793	-0.0252522	-0.0968265	1.95143	1.80294	0.0782363	0.438003	1.33749	-0.513867	0.191906	0.0208976	-0.384565	0.454542	-0.51472	-0.409412	0.275363	-0.360538	-0.0303209	-0.017222	-0.138843	-0.198525	-0.486639	-0.353519	-0.0777285	-0.153684	1.89336	-0.271908	-0.537659	0.00549727	-0.122868	0.0631671	-0.440562	-0.113631	-0.258074	0.772036	0.0350002	0.406505	-0.388983	0.788874
TCGA-BK-A139	10.3	0	74	3	1	0.00193444	0.68523	0.234964	0.911364	-0.612107	-0.00334749	-0.034325	-0.870604	1.55668	1.25603	0.286581	0.00562232	-0.983411	1.56538	-1.36209	-0.708075	0.394271	-1.17732	0.314299	-0.117767	0.412217	0.0162832	1.278	-0.401647	-0.391073	-0.333119	-0.323041	-0.450336	-0.0290203	0.741762	-1.18904	0.100163	-0.676491	0.537804	0.345796	0.0606871	1.12245	1.16041	0.104541	0.880388	-0.0579213	1.28839	0.0032674	1.29902
TCGA-B5-A11Y	18.6333	0	59	1	1	-0.0122003	-0.139984	0.0069951	-0.403449	-0.328175	0.474135	0.315565	-0.159006	0.797778	0.808412	0.862717	0.704123	0.563144	0.423027	-0.150658	-0.660966	0.443979	-0.509888	0.371126	-0.29244	0.789091	0.329029	-0.44317	-0.369376	-0.232861	-0.221564	-0.0722926	-0.0574171	0	1.33012	-0.938439	-0.261722	-0.259627	-0.281701	0.278162	-0.0240977	-0.201884	-0.248241	0.105313	1.05349	-0.255097	-1.39884	-0.0442544	0.72395
TCGA-B5-A11Z	17.6	0	61	1	1	0.0656858	0.0391515	0.219092	0.247458	1.30969	-0.792603	-1.24978	-0.530646	1.20902	1.41691	0.224892	0.415149	0.419515	-0.6162	-0.7644	0.784787	-0.152393	0.463835	0.177508	0.114728	2.25196	-0.173477	0.290569	0.328367	1.73338	0.027524	-0.35876	-0.170627	-0.188357	1.31539	-0.617867	-0.299179	0.310528	-0.364505	-0.139912	0.0879674	0.111992	-0.155605	-0.0598631	0.489743	-0.371548	-1.00494	-0.0164534	-0.831252
TCGA-B5-A11E	8.83333	0	53	3	1	0.0976438	0.901807	-0.301002	-0.966047	0.685857	-0.237522	-0.0847923	-0.676038	0.652187	0.925052	-0.0521502	-1.52736	0.661719	0.221382	-2.79317	0.558454	0.729231	-0.196677	0.25515	-0.304951	0.647747	-0.0591371	0.041048	-0.310412	-0.35978	-0.0839777	-0.270564	0.0749401	-0.0322334	0.857463	-1.46131	-0.277337	-0.111463	0.0494565	-0.229017	-0.0797226	0.309872	-0.154135	-0.230148	0.364178	-0.293684	0.910927	0.286777	0.853716
TCGA-B5-A11W	19.7333	0	61	2	1	0.0180234	-0.4951	0.356497	-0.239778	0.963984	-0.338467	-0.302925	-0.321644	0.478192	0.759288	0.259532	-2.34468	0.519452	-0.529779	-0.982091	0.72932	0.996146	-0.675182	0.429359	-0.220662	1.62721	0.125249	0.0043219	-0.329181	-0.0467484	0.131485	-0.29573	0.0325498	0.0153567	-0.507737	0.220537	-0.203767	0.321856	-0.130413	-0.033525	0.110921	0.132805	-0.0914162	-0.520692	0.148994	-0.0365777	-0.349436	0.219184	-0.22009
TCGA-B5-A11V	19.8	0	64	1	1	-0.0289079	0.50441	0.0402535	-0.954756	0.791286	-0.202958	-0.221349	-0.468941	0.052442	0.614186	0.539416	0.13894	0.107602	-0.652441	0.347252	0.0558723	1.01038	0.402243	0.564625	-0.227717	0.58003	0.144684	0.160236	-0.40419	0.554764	-0.037654	-0.258644	-0.25357	-0.0211679	0.640038	-0.23275	-0.176699	0.67578	-0.260391	0.0152817	-0.0699147	0.251225	-0.156566	-0.288828	0.654048	-0.357278	-0.530372	0.0916608	0.270366
TCGA-B5-A11S	27.7	0	63	2	1	0.0180818	-0.260802	0.0655643	0.142095	0.752743	0.129525	0.425723	-0.195379	1.21997	1.02256	-0.3325	-0.183448	1.32404	-0.0192029	0.384489	0.155058	0.0179587	-0.499505	-0.225553	-0.146398	0.984921	-0.0466396	-0.0949927	0.274232	-0.396332	-0.0420316	-0.0828162	0.0689953	-0.103159	2.12438	0.255886	-0.0917591	-0.190043	-0.529153	-0.111189	-0.0790759	0.303391	0.157498	0.0359659	1.09879	-0.543129	-0.300828	-0.226015	0.0347555
TCGA-B5-A11F	60	0	55	2	1	0.0431498	-0.188385	-0.404077	-0.199762	1.1193	-0.21516	-0.506182	-0.211572	2.27508	2.08727	0.170213	0.498148	0.843589	-0.632726	0.512594	0.327817	0.385368	0.316805	0.0402541	-0.252256	0.373859	-0.00649618	-0.118232	0.515314	-0.129821	-0.033354	-0.0752529	0.35734	0.0921813	0.35461	-0.49074	-0.218607	0.472608	0.0138709	-0.0882851	0.345185	0.259923	-0.0222219	0.285099	1.96686	-0.474397	-0.0859959	-0.303735	0.50437
TCGA-B5-A11G	60	0	71	1	1	0.0644889	-0.443792	-0.0795878	0.36864	0.415649	-1.02019	-1.76006	-0.090247	1.52358	1.88229	0.055268	-0.265702	-0.187674	0.017149	-1.94645	0.659913	0.762413	0.36594	0.176925	-0.195595	1.05366	0.437948	-0.372504	-0.20067	-0.199719	0.0160606	-0.763154	-0.116885	0.123055	1.52804	-1.03208	-0.208778	-0.102071	-0.027119	-0.213252	0.330636	-0.113509	-0.34909	0.0140769	-0.419368	-0.371548	0.219277	0.194361	1.07189
TCGA-B5-A11H	60	0	67	2	1	-0.199172	-0.589034	-0.437061	0.0604195	0.333046	0.357094	0.349411	-0.282398	1.43337	1.37669	-0.066998	-0.152459	0.920848	0.39907	-1.0791	0.0601614	-0.225249	-0.907395	-0.0181639	-0.170598	1.42446	-0.16786	0.0285953	0.0664128	-0.399824	-0.254056	-0.503653	-0.329628	-0.192156	1.3873	-0.141069	-0.108242	-0.205143	-0.339122	-0.183406	0.178652	0.167332	-0.32541	-0.337889	-0.183337	-0.355176	0.220987	-0.336514	1.57738
TCGA-B5-A11N	44.5667	0	69	1	1	0.0647802	-0.0419114	-0.0822402	-0.575066	0.48795	-0.710789	-0.98008	-0.791044	0.384187	0.0798923	0.698742	0.0885591	-0.539097	0.693733	-1.04504	0.394184	-0.273327	-0.403011	0.588179	0.106581	2.02493	-0.109107	-0.0735971	0.0891143	0.370737	0.0304603	-0.267616	-0.363766	-0.017737	0.384754	-0.797105	0.174507	0.251515	-0.171971	-0.0253822	0.172572	0.144096	0.301047	-0.102641	1.37551	0.118556	0.485093	-0.0019206	-0.198031
TCGA-BK-A13C	13.7333	0	47	2	1	0.0687716	-0.510857	0.0366021	-0.580823	0.761812	0.884263	0.78722	-0.0987574	0.404617	0.766361	0.18701	-0.00421836	0.770537	-0.569327	-0.704159	0.640497	0.710616	-0.184416	0.379363	-0.0848032	1.50868	-0.0653155	0.220222	-0.0624681	0.325616	0.219279	-0.445773	-0.091337	0.0350926	-0.67786	0.173433	-0.0256699	1.16344	-0.365702	0.07678	0.373561	-0.101805	-0.143264	-0.0791529	1.92709	-0.326627	-1.08465	0.234029	-0.463327
TCGA-BG-A18A	14.2	0	74	1	1	-0.32746	-0.590381	0.196668	-0.729443	0.70989	0.102884	-0.257871	-0.125811	0.738011	0.381252	0.643954	0.702506	1.12755	-0.852996	-0.234839	0.602529	0.40515	0.0565562	0.531668	-0.53664	1.73589	0.0423322	0.0225314	0.0245467	-0.486234	-0.00218622	-0.494971	-0.0137131	-0.238464	-0.132269	0.712064	-0.58887	-0.31795	-0.190806	-0.215201	0.165348	0.279905	-0.430356	-0.0491666	1.02903	-0.479224	-0.399064	0.0419162	0.0605635
TCGA-D1-A160	3.73333	0	70	2	1	-0.161723	-0.37655	0.0311829	-0.447413	0.189184	0.643543	0.242857	-0.325547	1.84926	2.04286	0.415039	-0.275744	-0.725225	-0.561001	-0.757783	0.530741	-0.221647	-1.16657	0.125179	-0.359853	1.54605	-0.0747165	-0.408879	-0.128212	-0.624924	-0.0899143	-0.438826	-0.208663	-0.0409005	-0.709485	-0.917733	-0.378307	0.09854	-0.39419	-0.15604	-0.0906145	0.398682	-0.345772	-0.162007	1.41216	-0.62431	0.167964	0.0146544	-0.465913
TCGA-D1-A161	29.7333	0	78	1	1	-0.0426718	-0.50713	0.433815	0.477232	0.839348	0.0134723	-0.325852	0.122004	1.8726	1.41915	0.370266	0.0620794	1.13502	-0.614326	-0.161259	0.088773	0.147583	0.0663434	0.120213	-0.213193	1.31709	-0.108229	-0.426784	0.0902148	-0.0658614	-0.101757	-0.591093	-0.273147	0.0322094	1.26887	1.4653	-0.25702	0.0563382	-0.277531	-0.154697	0.166932	0.231312	-0.332236	0.069729	0.291568	-0.252854	-0.782507	-0.1471	-0.198453
TCGA-D1-A15Z	1.93333	1	72	2	1	0.0482444	-0.614717	-0.118038	-0.0715203	1.11558	-0.18541	-0.495859	-0.41835	0.746351	0.917037	0.157754	0.792741	-0.162079	-0.330797	1.10266	0.482132	0.144312	-0.0632582	-0.167474	-0.0394612	0.199428	-0.0992026	-0.166716	0.210582	-0.232434	0.0526861	0.0281417	0.32452	-0.0487271	1.07548	-1.22635	-0.0216056	0.387419	0.155743	3.17594	0.00261345	0.243431	-0.0229453	0.129613	0.246929	-0.422614	-0.0158389	-0.307147	0.371973
TCGA-D1-A162	38.1667	0	69	1	1	-0.179849	-0.804671	0.549742	-0.153806	0.388656	-0.418789	-0.717396	-0.0201888	1.68693	1.4306	-0.00218353	0.327443	1.24652	-0.441604	-0.221663	0.126181	-0.795161	0.740555	-0.579047	-0.02301	-0.711835	-0.267965	-0.204957	0.192542	-0.110034	-0.0720704	-0.271286	0.057663	0.00105713	-1.02617	2.6183	0.0298863	-0.0989766	0.116425	-0.269202	0.185273	-0.598055	-0.214826	-0.200885	-0.534167	0.213032	-1.45683	-0.337187	-0.134256
TCGA-D1-A167	15.9333	0	70	2	1	0.188479	-0.00680553	-0.163224	0.226211	0.0463928	-1.01148	-1.53948	-0.419755	-0.975493	-0.946556	-0.483504	-0.180364	0.433765	-0.432279	-1.3014	0.0373005	0.0247654	-0.160152	0.00593595	0.0748567	0.329001	-0.357866	0.17876	0.713431	-0.413317	-0.0906476	0.388221	-0.523664	-0.14326	1.6223	0.157037	0.185414	-0.1355	-0.200342	-0.00579536	-0.0659424	0.187318	-0.0315585	0.219486	1.47372	0.162974	0.44678	-0.0362471	-0.0558614
TCGA-D1-A168	36.6	0	67	3	1	-0.181357	0.116758	0.080511	0.280118	0.204942	0.612781	0.261831	0.188527	0.593766	0.333089	-0.315029	0.272199	-0.632571	-0.392964	-0.0511722	-0.0280517	0.0421623	-1.09558	-0.00661975	-0.343536	1.14782	0.0764087	-0.502976	-0.185912	-0.0333685	-0.0619402	-0.738671	-0.141166	0.0481666	-0.51252	-0.0214651	-0.269561	0.417068	-0.0405685	0.0942541	0.173458	-0.342779	-0.0460279	-0.352968	0.608773	-0.492512	0.225361	0.00593618	-0.144202
TCGA-D1-A16B	36.8667	0	64	2	1	0.0353074	-0.00219755	-0.0680738	-0.698933	0.631205	0.494788	0.576828	0.0352718	1.20285	1.04692	0.055731	0.765726	0.55285	0.061563	1.55505	0.0954381	0.0513804	0.0116338	-0.334415	-0.126788	-0.388531	-0.150002	0.709631	-0.139456	0.362171	0.0141129	-0.184997	0.0662591	-0.0455382	0.792915	-0.903231	-0.110495	-0.424851	-0.0964068	0.00737071	-0.0396668	0.786127	0.0811369	0.217777	1.81534	-0.108463	0.744308	-0.0880572	1.22121
TCGA-D1-A165	0.666667	0	64	1	1	0.303481	-0.33124	-0.0755586	-0.97646	0.424678	-0.128087	0.492355	-0.155377	0.609297	0.53437	0.0850413	0.366901	0.654221	-0.0840884	0.966158	0.620075	0.194195	0.318637	-0.0272403	0.0376591	-0.796592	-0.0746518	0.225417	0.0548756	0.128796	0.163511	-0.400182	-0.0375566	0.0750403	-0.574856	0.104276	0.223755	0.453072	-0.396549	0.0854969	0.0992733	0.343155	0.23116	0.0958209	1.64729	-0.191588	-0.169997	-0.234237	0.539729
TCGA-D1-A16F	2.66667	0	60	2	1	-0.123945	0.0770013	0.0406963	0.342882	0.282151	0.281176	0.0166188	-0.118396	1.56045	1.60896	0.490695	-0.0769804	0.0877362	0.779508	-0.161004	-0.74861	-0.133617	-0.614057	-0.270139	-0.17522	1.21579	-0.369291	-0.448188	-0.334593	-0.496003	-0.325584	-0.568626	-0.106659	0.0769017	0.0275791	-0.395906	-0.217887	0.151627	-0.549587	-0.0794399	-0.168347	0.0524609	-0.315277	0.016098	1.6714	-0.21173	-0.971822	-0.379749	-0.500516
TCGA-D1-A16E	37.3	0	73	1	1	0.110443	-0.725367	0.208778	0.189368	-1.46752	0.208773	0.25289	0.316055	1.90282	1.81693	0.487449	0.10656	0.68955	0.35267	1.16737	0.265887	0.0787114	-0.463685	0.122386	-0.0760895	-0.305481	-0.00320488	-0.32906	-0.533869	-0.532683	0.111553	-0.0867907	-0.102211	0.339478	-0.244756	-0.145127	0.106722	0.129956	-0.0941837	0.0854437	0.0401599	0.36093	0.139993	-0.042144	1.99952	0.0933823	-0.717231	-0.0702221	0.7121
TCGA-D1-A16D	38.0333	0	49	2	1	-0.188395	-0.741247	0.0866067	-0.0763244	-0.111229	0.372541	0.194346	-0.251591	2.20951	1.8856	0.47375	0.0291512	0.315546	-0.181339	0.534314	0.034998	-0.282039	-0.706386	-0.297958	-0.210671	0.830227	-0.338276	-0.629938	-0.350958	-0.580685	-0.0586674	-0.358774	-0.120913	0.18806	0.242013	-0.0328474	-0.239162	-0.35093	-0.289803	0.0579004	-0.161983	-0.363379	-0.0923338	-0.000439481	0.782867	-0.254515	-1.35249	0.0146544	0.157236
TCGA-D1-A16J	30.3	0	61	2	2	-0.0668903	-0.325823	0.10869	-0.157705	-0.567713	0.133399	-0.0154485	-0.114355	0.872216	0.461887	0.109419	0.691927	0.373558	-0.0789302	0.70149	-0.763316	-0.290866	0.183033	-0.425876	0.0121694	0.131424	-0.416523	0.0738017	-0.176449	0.248479	-0.174462	-0.315956	-0.222273	-0.106721	0.0251568	0.952738	-0.0562419	-0.312211	0.0112366	0.313758	0.00800864	0.204501	-0.235527	-0.0468781	0.590212	0.238939	0.518499	-0.287677	-0.227893
TCGA-D1-A17B	7.06667	0	69	2	1	0.71523	-0.260617	-0.669109	-0.427954	-1.37057	-0.549704	0.0412353	-1.27016	0.928279	1.63378	0.488879	0.782806	0.199787	0.35012	-0.699896	-0.838647	0.890978	0.224518	0.132883	0.478674	-2.4754	0.15465	-0.039334	-0.0555401	0.210549	0.231249	0.734953	-0.108949	0.282712	2.30926	0.110028	0.514079	0.304953	0.388826	0.978156	-0.234536	0.00205492	0.221684	0.181797	0.593807	0.804349	-0.832448	0.0122639	0.398122
TCGA-D1-A17Q	1.8	0	54	2	1	-0.0518715	-0.475964	-0.199558	0.139966	0.99108	0.277966	-0.245625	-0.28219	2.18105	1.92631	0.216822	-0.127534	0.41716	-0.9377	-1.18111	0.343242	-0.389127	0.291136	-0.19603	-0.256722	0.299862	-0.319372	0.0681356	0.374855	-0.720084	-0.220974	1.30257	-0.104388	-0.200748	0.297748	-0.932097	-0.472994	-0.464372	0.697561	-0.347992	0.528838	0.0130922	-0.326115	-0.103446	0.494	-0.505459	0.319608	-0.334828	0.391046
TCGA-D1-A16O	34.0667	0	44	1	1	0.0017378	-0.0956133	0.296149	0.273702	0.377961	-0.228793	-0.901531	0.0244453	2.55887	2.42315	0.609393	-0.16919	0.317235	0.558822	-0.279888	-0.0174302	0.326789	-0.553259	0.016066	-0.0919017	1.53775	-0.0560944	-0.818039	-0.226197	-0.600939	-0.296087	-0.242757	-0.200367	0.0765836	-0.678969	0.0222337	-0.358979	0.042674	-0.0588619	-0.0094112	0.603513	-0.221114	-0.17425	-0.19044	1.39107	-0.345721	-1.87556	-0.266116	-0.599392
TCGA-D1-A17R	11.3	1	58	2	1	-0.133828	-0.120373	0.0790084	-0.252982	0.146937	-0.336573	-0.700316	-0.584299	0.64007	0.911035	0.160713	-1.34696	-0.0859514	-0.61774	-1.14307	0.14191	0.23765	0.515617	0.332514	-0.356015	0.110536	-0.0733259	0.0448441	-0.217563	-0.181423	-0.214295	-0.316386	-0.332281	-0.0574213	-0.575084	0.29565	-0.101614	0.591795	-0.249354	-0.168868	-0.120948	0.18976	0.0207852	-0.311867	0.771822	-0.29699	0.567953	-0.0818947	0.307574
TCGA-D1-A16Q	10.8	0	54	2	2	0.0828803	-0.980375	-0.00690969	-0.300468	0.669231	0.250889	0.0350084	-0.215872	0.803021	1.3256	0.238597	-0.220789	0.386568	-0.511307	0.685247	-0.386856	0.71303	0.934473	0.352174	-0.327525	0.439736	-0.031431	0.19593	-0.271529	-0.146665	-0.183242	-0.387104	-0.194842	-0.0912667	0.972018	-0.782218	-0.358586	0.283882	-0.264387	-0.0586292	-0.0109236	0.570574	-0.416712	0.0752863	-0.112709	-0.409483	-0.197792	-0.104916	0.510421
TCGA-D1-A17S	24.6333	0	59	1	1	0.490485	-0.727684	-0.10947	0.688269	-0.455327	0.00365798	-0.258055	0.00647916	1.92042	1.75358	0.51647	-0.0128298	0.565819	-0.150067	0.494067	0.809639	0.55707	0.581847	0.307643	0.130195	-0.529796	0.0905819	0.525587	-0.159757	-0.39083	0.327627	0.0965176	-0.376754	0.331559	-0.221255	-0.103929	0.169604	0.414117	-0.0647453	0.207111	0.476335	0.519802	0.247579	0.444408	-0.311082	0.353194	-0.856758	0.0539605	0.826097
TCGA-D1-A16R	0.7	0	39	1	1	-0.242705	-0.539549	1.00818	-0.22772	0.349703	-0.00125403	-0.58224	0.0707333	1.76713	1.7434	0.706219	0.351316	0.611816	0.126586	0.150118	-0.122096	-0.00579977	0.616552	0.289197	-0.427849	0.221772	-0.223903	-0.29908	-0.0940759	0.83921	-0.245809	-0.653812	-0.230253	-0.0934557	0.201147	1.85223	-0.368436	-0.0926842	-0.0658939	-0.131043	0.545195	0.124838	-0.408989	-0.206646	0.182321	-0.374808	-1.14774	0.0406184	-0.286655
TCGA-D1-A17T	2.33333	0	67	2	1	0.268515	-0.551508	0.297651	0.294082	-0.39314	0.443135	0.214621	0.102239	2.25327	1.33503	0.285984	0.603172	0.926849	0.208141	1.41652	0.246534	0.350557	0.156833	-0.0832549	0.0593325	-0.62819	0.0491869	0.168475	-0.134426	-0.114969	0.173905	0.167295	-0.049498	0.2812	3.10011	-1.63536	0.213902	0.14638	0.0366621	0.142956	0.100364	0.937314	0.367206	0.532333	0.42806	-0.0843155	0.0761092	-0.00211445	0.792946
TCGA-D1-A17N	1.53333	0	46	2	1	0.453539	-1.16594	-0.218235	0.143996	-1.92782	-0.129437	0.39949	0.773135	0.760839	1.38746	0.222541	-0.199437	1.42916	0.326053	1.30247	0.203761	0.213756	-0.549065	0.1485	0.172593	-2.24105	0.1346	-0.214314	0.0816553	-0.284395	0.311125	1.19028	-0.499578	0.415701	1.49952	0.931266	0.46413	0.788416	0.667801	0.208559	0.134594	0.522133	0.302497	-0.0697531	0.362852	0.339848	-0.523062	-0.0967976	0.339558
TCGA-D1-A16X	3.7	0	54	2	1	0.0550753	-0.19635	-0.0394555	0.319375	0.288924	0.949874	1.0108	-0.10517	2.20276	1.81847	0.0928664	0.21346	-0.0460357	0.644656	0.788213	-0.739796	0.252544	-0.475481	-0.247999	-0.0600484	0.510164	-0.209879	-0.0198004	-0.205366	-0.0310183	-0.209208	-0.229053	0.0044005	0.194098	1.16074	-1.53556	-0.0523015	-0.313463	-0.126779	0.101573	-0.0925795	0.263189	-0.14091	0.235735	1.6271	-0.226141	0.770644	-0.549905	0.902781
TCGA-D1-A16Y	17.7333	0	56	1	1	-0.0913365	-0.320041	-0.0376497	0.188591	0.484859	-0.033462	-0.327644	-0.0216838	1.96551	1.83088	0.298795	-0.406977	0.445183	-1.03727	0.878067	0.492511	-0.176274	0.0978056	-0.316848	-0.304042	1.59187	-0.28417	-0.0370783	-0.0404962	0.237071	-0.00759338	0.222432	-0.358067	0.241114	0.213949	0.126749	-0.275142	0.00256912	-0.163382	0.17429	0.200978	0.26516	-0.0722327	-0.0111029	0.436566	-0.551005	0.332595	-0.511805	0.732246
TCGA-D1-A17M	10.3667	0	56	1	2	-0.165205	-0.340963	-0.0737585	0.340237	0.3677	0.52723	0.395573	-0.300018	1.49498	1.46277	0.365002	0.435488	-0.266093	-0.0587477	0.252705	0.271305	-0.181025	0.216131	-0.343097	-0.154951	-0.0655542	-0.381096	0.136448	0.0467727	-0.4572	-0.0569861	0.0698214	-0.359888	0.0128442	-0.0875983	-0.616023	-0.154406	0.431936	-0.0743493	-0.138573	-0.185415	0.0350004	-0.150924	-0.0184332	1.45213	-0.371548	0.540232	-0.394382	-0.365205
TCGA-D1-A17L	26.7333	0	81	1	1	0.0551558	-0.774411	0.132065	-0.240788	0.937253	0.757738	0.186977	-0.0614143	1.98653	1.79558	1.29791	0.467299	0.935267	-0.254987	0.731251	0.484839	-0.107343	-0.310156	0.236033	-0.151094	1.96531	0.0190785	-0.171448	0.389212	-0.431424	0.0466904	2.50079	-0.297733	0.17325	0.0631906	-0.3428	-0.0697592	0.222961	1.39248	-0.0507311	0.403746	0.485919	-0.106757	0.0928274	1.2922	-0.314642	-1.46532	-0.00891446	0.278291
TCGA-D1-A17K	28.4667	0	74	2	1	0.271119	0.607234	-0.339707	-1.55805	0.397872	-1.51778	0.00283738	-0.589991	-0.70647	-0.557436	-0.0692116	-1.45478	0.324011	-0.217251	-0.57442	0.644315	0.774749	-0.532836	0.337399	0.00297787	1.57656	0.34457	1.07127	-0.29798	-0.110175	0.11063	-0.0506878	-0.22562	0.0995874	0.315265	-1.08612	-0.0734271	-0.118977	0.488395	0.223273	-0.2159	0.104663	0.0863842	0.107823	1.3016	-0.0705767	2.69742	0.501711	0.975823
TCGA-D1-A175	6.73333	0	48	3	1	-0.104646	-0.181355	0.0769128	0.28455	0.66878	0.186729	-0.350199	-0.0736314	1.58293	1.04397	0.585068	0.751608	0.154422	-0.00686686	-1.55169	0.695598	-0.314486	-0.865933	0.278751	-0.283261	1.90889	-0.143571	0.583218	-0.10101	-0.316998	-0.00213419	-0.316521	-0.412107	-0.241032	0.821651	-0.267666	-0.391953	1.11247	0.113636	-0.151061	0.572271	0.867401	0.0092899	0.299236	1.3701	-0.505804	0.997176	0.00665124	-0.0260835
TCGA-D1-A176	30.5667	0	67	2	1	-0.024802	0.00965055	-0.0800455	-0.0273288	0.612672	-0.169633	-0.388983	-0.386085	2.39902	2.14678	0.293398	0.685147	0.951837	-0.0587149	-0.346463	0.564228	-0.104973	0.213909	0.136155	-0.227875	1.5784	0.238672	0.257714	-0.127592	-0.0229447	0.0726564	0.207027	0.108766	-0.0425781	0.373074	-0.338282	-0.223613	0.410266	0.203202	-0.155806	0.0817492	-0.00571234	-0.137429	0.032289	1.31761	-0.471971	0.462406	-0.33475	0.124223
TCGA-D1-A17C	1	0	78	1	1	0.0141412	-1.04088	-0.210801	-0.179713	0.282753	-0.0906036	-0.453359	-0.0466541	1.85253	1.4161	0.133322	0.440683	0.397984	-0.483368	-0.234792	0.16823	0.43169	0.69382	0.130448	-0.133248	0.422475	0.0635889	0.277674	-0.186113	-0.232042	0.0265774	-0.432637	-0.0217629	-0.144447	0.605599	-0.325909	-0.26575	0.603303	-0.237458	-0.0225894	-0.0798194	0.080048	-0.20657	0.193179	-0.47224	-0.260323	-0.604874	-0.0776319	-0.310315
TCGA-D1-A17F	1.3	0	68	2	1	-0.172795	-0.902525	1.12137	-0.3554	0.174293	0.755237	-0.450153	0.0850361	0.247268	0.504552	0.641083	-0.722281	0.595597	-0.785071	0.0114234	0.321742	0.0762982	1.06988	0.316568	-0.323994	0.849028	-0.0499491	-0.527606	0.124812	-0.18779	-0.0525128	-0.206614	-0.306752	0.00743785	-0.511547	2.73746	-0.337588	-0.330965	-0.0107597	-0.419674	0.42674	-0.595049	-0.40755	-0.51298	-0.213238	-0.0324656	-1.9608	-0.229116	-0.623311
TCGA-D1-A17H	28.4	0	61	1	1	-0.391739	0.025924	0.43183	0.188007	0.321458	0.571654	0.152983	0.0415609	1.87886	1.68655	0.649435	0.524346	0.79411	0.518273	-1.25437	0.296291	0.399035	-0.9221	0.0660103	-0.50651	1.93149	-0.282427	-0.453533	-0.393993	-0.589805	-0.217625	-0.718057	-0.542013	-0.157308	0.633844	1.19238	-0.575676	-0.355656	-0.0822338	-0.335262	0.220273	-0.469701	-0.568538	-0.298813	1.87886	-0.536133	-0.978026	-0.371309	0.160532
TCGA-D1-A177	18.2667	0	70	2	1	-0.143813	-0.193807	0.131307	0.68266	-0.273691	1.14447	0.998421	-0.204523	1.56333	1.85849	0.368881	-0.321018	-0.807196	1.0488	-1.3106	0.327331	0.350294	-1.2852	0.240083	-0.294325	1.26474	0.0952803	0.129186	-0.616902	-0.678167	-0.000232282	-0.261873	-0.261413	0.0449759	0.462457	-0.991819	-0.346214	0.216117	0.105989	0.109974	-0.225754	0.0474622	-0.272443	-0.285399	1.78783	-0.405539	0.983804	0.342632	-0.538593
TCGA-D1-A17D	30.8667	0	58	3	1	0.362328	-0.570961	-0.0978184	-0.744739	0.98214	-0.00125403	0.102888	-0.444662	0.806618	0.848171	0.192743	-0.642505	0.30579	-0.673405	-0.252897	0.673478	0.221409	-0.0755705	0.415114	0.000721701	1.4171	0.0392236	0.232845	-0.168511	-0.351438	0.109041	-0.684139	-0.302046	0.0899122	-0.395338	-0.493238	0.0632287	-0.308809	-0.136359	0.0647644	0.0863578	0.165852	0.193964	-0.00142891	1.36527	-0.0759405	-0.200282	0.329264	0.583692
TCGA-BG-A187	14.9333	0	65	2	1	0.0533227	0.333293	0.220617	-0.910536	0.635241	-0.242685	-0.086335	-0.18767	-0.14055	0.0554335	0.0722698	0.398115	0.843548	0.141286	0.120381	0.340238	0.203236	0.00280633	0.0963593	-0.108754	1.68942	-0.182975	-0.174564	-0.169117	-0.35249	-0.0842327	-0.110693	-0.0878274	-0.0641055	1.22148	1.33184	-0.0239277	0.203053	0.0334724	-0.0834106	0.325683	0.530273	-0.0781998	0.0868858	0.946229	-0.223245	-0.445578	-0.0879857	0.619617
TCGA-BG-A18B	15.6667	0	53	2	1	-0.110551	0.320434	-0.0563037	-0.0594336	0.924071	0.0855907	-0.426859	-0.842642	0.935062	1.2298	0.273882	0.0453316	0.117544	-0.505252	-0.750629	0.664636	-0.0659978	0.530273	-0.02984	-0.348254	1.84425	-0.172188	-0.118238	-0.144946	-0.668752	0.032206	-0.757559	0.0965357	-0.250523	2.01223	-1.40289	-0.503148	0.193803	-0.174892	-0.397977	1.03149	0.305498	-0.302683	-0.19709	1.82214	-0.467994	-0.171791	-0.325632	0.0602608
TCGA-BG-A18C	15.6667	0	72	2	1	0.114088	-0.658199	-0.400723	0.235839	-0.0508005	-1.20194	-1.13432	-0.690413	0.462446	0.691493	-0.382674	-2.3519	-0.573064	0.521291	-1.20356	0.441967	0.743935	0.402325	0.290306	-0.0693932	0.957555	0.0594185	0.372523	0.166622	-0.327698	0.255928	-0.226182	-0.197883	-0.21032	0.498602	-0.649828	-0.0902096	0.314516	-0.0840642	0.0733114	-0.135363	-0.174242	0.0397349	-0.205396	-0.480814	0.0719958	1.43489	0.0549175	1.16904
TCGA-B5-A0JX	45.3333	0	62	3	1	0.0700402	0.104478	-0.368531	0.777251	0.411732	-0.47606	-0.548912	-0.563249	0.0537815	0.55219	-0.17198	-0.173306	-0.0664032	-0.354004	0.419486	-0.148455	1.1704	0.391693	-0.00468741	0.0551403	-0.0812022	-0.118821	0.158988	0.591854	-0.35496	-0.204313	-0.515556	-0.293755	0	1.25262	0.235387	-0.267024	-0.520249	0.378521	0.108041	-0.168708	0.28758	-0.152926	0.596331	1.06777	-0.243338	1.00521	-0.21116	1.24066
TCGA-AP-A0LS	60	0	63	2	1	0.200084	0.870524	0.306668	1.0605	0.375352	-0.287121	-0.401003	-1.05091	-0.222892	-0.23106	-0.0858409	-0.11119	-0.0146068	0.57609	-1.58194	0.992737	0.501539	-0.558813	0.318913	0.239605	0.497228	0.0647424	0.351466	-0.0287336	-0.297626	0.337332	0.228187	-0.0172723	-0.198007	3.02624	0.186922	-0.158342	-0.428846	-0.0172847	-0.110488	-0.0452909	-0.188504	0.00545359	0.162495	1.08074	-0.0338274	0.874067	-0.320514	1.49701
TCGA-BG-A0MA	10.8667	1	60	3	1	-0.154282	-0.51722	0.686162	0.0140964	0.303918	-0.807989	-1.37246	0.114421	0.798962	0.651825	0.00144176	-0.19248	1.44006	-0.748584	-0.793246	0.113857	0.075944	1.28873	-0.0489519	-0.420089	0.325907	-0.134622	-0.0952853	0.507333	0.45707	0.047678	-0.054675	-0.195879	-0.247398	-0.332366	1.90432	-0.172199	0.39165	-0.145299	-0.189666	0.512015	-0.499261	-0.291342	-0.356977	-1.01664	-0.281756	-1.83401	-0.38587	-0.651459
TCGA-AP-A1DV	6.8	0	59	3	2	0.276865	0.557094	-0.274007	-1.17106	0.244816	0.203627	0.117149	-0.330235	0.322282	-0.133768	0.683193	0.833674	-0.02504	-0.0404801	-1.93705	-0.0738364	1.09626	-0.868172	0.935264	0.0462412	1.67778	0.310316	0.0507355	0.0643953	-0.446806	-0.00134603	-0.156403	-0.307582	-0.0238235	0.366566	-1.40814	0.266177	0.019313	-0.316244	-0.176505	-0.316051	-0.10025	-0.155338	-0.0138626	0.553374	-0.0102036	0.397166	-0.117839	1.35412
TCGA-AP-A1E4	16.4667	0	54	2	1	0.060724	-0.264826	0.177986	-0.485887	0.891325	-0.202862	-0.377913	0.251598	-0.0185297	0.00130978	0.0663937	-0.0573708	-0.742177	-0.0659976	0.374908	0.545032	0.157469	-0.487057	0.039704	-0.2672	1.30517	0.0493142	-0.699041	-0.159214	0.253038	0.23474	0.175557	0.0832788	0	-0.751358	1.26755	0.0285986	0.163828	0.0297258	0.144626	0.263101	0.460138	-0.0366007	0.0203231	0.0228988	-0.207856	-0.187609	0.102127	-0.691033
TCGA-AP-A1DH	60	0	62	3	1	0.0632065	-0.725417	0.0345051	0.0152708	0.382083	1.27393	1.0713	0.184568	1.85251	2.36367	0.129079	-1.90797	-0.803383	1.44566	0.0661696	-0.139263	0.186596	-0.175149	0.237887	-0.289655	1.69984	0.1285	0.0946317	-0.402128	-0.400431	0.0454625	-0.630724	0.163323	0.0752698	2.80063	-0.431918	-0.125396	0.136687	0.211496	0.288346	0.0328696	0.983111	-0.357551	-0.0496979	0.454025	-0.603675	1.07908	0.21616	0.197311
TCGA-AP-A1DM	56.6667	0	60	1	1	0.0335596	0.775898	0.0937039	-0.897154	0.310887	0.162987	0.622762	-0.124168	0.024811	0.0225754	0.431245	0.182239	-0.0304065	0.127541	-0.0838165	0.638733	0.344265	0.0652721	0.321611	-0.412822	1.5525	0.165304	0.0457147	-0.29762	-0.307987	0.0776686	-0.342421	-0.0224981	-0.0224795	0.686335	-0.746097	-0.118019	1.02515	0.137596	0.0176423	-0.240485	0.527259	-0.193247	-0.19781	1.24004	-0.690292	1.34672	0.139049	0.0915845
TCGA-AP-A1E1	10.5667	0	74	2	1	0.034581	0.564572	0.557084	-0.626579	0.395311	0.357604	0.155943	0.240793	0.648399	0.587609	0.402239	0.653124	0.54258	1.00798	1.12346	0.357307	0.526236	0.768694	0.0207925	-0.00169599	0.596904	0.0803032	0.793012	-0.231187	1.07867	-0.00801967	-0.604578	0.298973	0.0226577	2.40384	-0.265148	0.0119466	0.991736	0.0943565	-0.0432305	0.191477	0.77625	-0.0303107	0.0951152	0.671723	-0.668822	1.11341	0.155237	-0.218192
TCGA-AP-A1DO	31.4333	0	62	2	1	0.0774233	0.235333	-0.33784	0.765388	0.759043	0.359822	0.178003	-0.777316	1.30938	1.74456	0.872276	-0.439844	0.486581	0.0689184	-1.49849	0.0227289	0.376471	-0.432441	0.17462	-0.226584	1.14777	-0.0785549	0.0392208	0.168814	0.0439208	0.0138613	-0.201326	0.0215267	-0.327879	0.169256	-1.36835	-0.444603	1.86776	-0.450485	-0.0931696	-0.156927	0.105055	-0.391294	-0.168134	2.2063	-0.455844	0.614103	-0.329137	-0.135934
TCGA-AP-A1DP	36.0333	1	70	2	1	0.237878	-0.336376	0.270164	-0.506422	0.580539	0.0950566	0.0561201	-0.10306	1.05661	0.880603	0.695667	0.858611	0.620769	0.803053	-0.388466	0.51354	0.724687	0.630697	0.393731	0.0719335	1.48038	0.0891101	-0.352653	0.0482683	-0.446899	0.182626	-0.767958	-0.106526	0.108332	-0.198497	-1.3814	0.00140088	1.02627	-0.465023	-0.293582	0.0264566	0.209793	-0.0642958	0.0638224	0.416518	-0.505507	-1.18202	-0.227394	0.208129
TCGA-BS-A0VI	55.3667	0	58	3	2	0.158936	-0.241616	0.0258552	-0.642195	-0.477625	-1.05983	-0.43153	-0.298098	0.548587	0.929289	0.107076	0.0496125	-0.374302	-0.456845	-0.911793	-0.375981	1.40443	0.829988	0.559366	-0.10569	0.936805	0.715914	0.0886106	-0.284136	0.081142	0.317198	1.01211	-0.278242	-0.0313614	-0.13211	0.226302	0.734269	1.96864	0.0272784	0.562425	-0.189287	-0.116206	0.0986079	-0.144808	1.04282	0.54836	0.188682	0.162692	0.189586
TCGA-BS-A0V4	1.03333	0	56	1	1	-0.0539244	-0.25898	0.283735	0.253399	-0.329178	0.23588	-0.117562	-0.319332	1.9242	1.89645	0.461193	0.435254	-0.484646	0.460325	0.0807659	-0.526175	0.28231	-0.771237	0.373263	-0.0772601	1.86868	0.474059	-0.816365	-0.109456	-0.552606	-0.101176	0.0510482	-0.0766652	0.124096	-0.179795	-0.590172	-0.367449	0.8199	0.117151	0.397956	-0.00874963	-0.114862	-0.351491	-0.129292	1.63291	-0.402198	-0.969834	0.25486	-0.194884
TCGA-B5-A11P	37.3333	0	87	3	1	0.20734	-0.148235	0.0325772	0.439329	0.944148	-0.027656	0.0382012	-1.14927	0.559875	0.850596	0.595283	-1.68955	-1.04309	-0.62203	-1.30595	0.181223	1.00529	-0.148259	0.623134	-0.31109	0.240149	0.0206221	0.602909	-0.120493	-0.309746	-0.0145813	-0.844444	0.210491	-0.0585577	-0.688297	-1.22059	-0.352163	0.179456	0.01517	0.0765369	-0.148758	0.250766	-0.178491	-0.239467	2.24664	-0.56051	0.360985	0.335425	3.09416
TCGA-DI-A1BY	37.1333	0	63	2	2	0.278407	-0.877965	0.0447426	0.301313	-0.295163	0.656143	0.497798	0.428875	2.7821	2.03007	0.298222	-0.0582924	0.191333	0.0468552	1.43861	-0.0510058	0.717218	0.211569	0.00834546	-0.0140605	1.50486	0.12512	-0.077069	-0.039516	0.00960554	0.123542	-0.619564	0.0764211	0.181701	1.16138	-0.391008	-0.0141786	0.121164	0.0312346	0.191736	0.267209	0.847359	0.48489	0.609189	-0.611258	-0.46625	0.34528	0.184067	1.18216
TCGA-EC-A1NJ	8.7	0	73	2	2	-0.0658162	-0.0557451	-0.152018	0.19908	0.259663	-0.0914269	-0.32694	0.594809	2.56118	2.58455	0.360245	0.138401	1.30474	0.45883	-0.252098	-0.328191	-0.185164	0.256008	-0.361321	-0.119502	0.472211	-0.380695	0.234554	0.0273232	-0.105646	-0.0141176	-0.605209	-0.0991712	-0.217327	0.219386	1.82045	-0.0756985	-0.3517	-0.115893	-0.19886	0.037714	-0.803462	-0.378237	-0.212682	0.943635	-0.153896	0.126222	-0.510185	0.744096
TCGA-B5-A1MV	14.6	0	84	2	1	0.102871	0.120104	0.198787	0.550834	-0.176243	1.05033	1.10736	0.6673	2.02036	2.37015	0.437747	0.62796	-0.510572	0.701666	0.670151	-0.700401	0.312467	0.106022	-0.0353277	-0.100326	0.56207	-0.0243158	-0.391151	-0.483249	-0.0199947	-0.0215113	-0.757055	-0.174114	0.230759	0.0462141	1.0184	0.0576016	0.376157	0.100164	0.501734	0.0242436	0.878071	-0.170117	0.272099	2.08091	-0.23372	0.215333	-0.324358	0.592233
TCGA-EY-A1GE	24.7	0	67	1	1	0.0606664	-0.0442672	0.446322	0.964787	1.0207	-0.343412	-0.529711	-0.148999	1.28379	1.35046	0.633201	-0.288544	0.229785	-0.430834	0.733138	0.524819	-0.167452	-0.057695	0.0343013	-0.0937642	1.44742	-0.214365	0.110935	0.0968773	0.145943	0.209213	-0.223596	0.141478	-0.0595546	0.0303536	0.802748	-0.0121094	-0.00404618	-0.230116	0.0254095	0.159185	-0.134264	-0.225815	-0.175322	1.03895	-0.31881	-2.0141	-0.0417023	-0.14469
TCGA-EY-A1G7	6.3	1	86	2	2	0.0294059	-0.682916	0.219727	-0.00685771	0.39202	-0.0267455	-0.344762	-0.373832	0.532411	0.56955	-0.0832058	0.127129	-0.892581	0.105967	0.716545	0.282323	-0.195842	-0.800948	-0.132273	-0.258181	1.00591	-0.154552	-0.248417	0.65647	0.260815	0.0460833	-0.185473	-0.108185	0.0849393	-0.181511	-0.541403	-0.151046	0.214716	0.230169	0.155346	-0.0130009	0.366486	0.26291	0.00698054	1.55726	-0.456099	0.867121	-0.0385634	0.411702
TCGA-EY-A1GD	8.26667	0	51	1	1	0.158905	-0.490171	0.275739	-1.4991	0.502516	-0.450884	-0.0566545	-0.115198	-1.36208	-1.00656	0.583906	0.308504	-0.439883	0.0821266	-0.166682	0.721891	0.459525	1.35179	0.370724	-0.0703912	2.31551	-0.0371995	0.983649	-0.282229	-0.181312	0.199406	-0.804071	0.258403	-0.0385172	0.435996	0.144529	0.23083	0.740144	-0.132376	0.118515	0.287751	0.301906	-0.206359	-0.0607695	1.18807	-0.29932	0.316624	0.384083	-0.479041
TCGA-EY-A1GF	27.5333	0	75	2	1	0.00755809	0.15739	-0.135722	-0.398368	0.763106	0.276084	0.091762	0.0794161	3.09433	2.38341	0.244533	0.415572	0.357221	-0.111641	-1.0558	0.282504	-0.262583	-0.41963	-0.10441	-0.342281	1.78994	-0.153113	-0.188182	0.0179508	-0.371179	-0.100569	-0.439427	-0.0949939	-0.146188	-0.481733	-0.85676	-0.361837	0.867925	-0.140286	-0.0506754	0.368091	0.644212	-0.159733	0.136803	1.84868	-0.79596	0.066829	-0.146962	-0.63549
TCGA-EY-A1GC	4.6	0	62	3	1	0.492439	0.338987	-0.133587	-0.697361	0.3488	-0.800945	-0.504284	-0.189332	-1.27483	-1.18892	-0.244349	-1.59067	0.658815	0.375706	-0.31646	0.582003	0.268959	-0.393319	0.0833539	0.22958	0.679269	0.0510577	0.646893	0.0602822	-0.06572	0.255328	-0.0681524	0.861112	-0.022823	1.02713	-0.720854	0.417971	0.166327	-0.0403966	0.137164	0.214554	0.562151	0.462057	0.280202	1.48807	-0.422773	1.05926	-0.276361	0.499642
TCGA-EY-A1G8	15.1667	1	83	3	1	-0.0807234	0.668852	-0.346094	0.648965	-0.366846	0.611096	-0.0562435	-0.224094	1.54126	1.52689	-0.00738306	-0.799274	-0.599145	1.13611	-1.58496	0.226055	-0.506836	0.120756	-0.295555	-0.15801	-0.0346591	-0.489017	0.0380897	0.410636	-0.458425	0.0643199	-0.342818	-0.150586	-0.283478	-1.17075	-1.06175	-0.202363	-0.35973	0.323581	0.00343786	0.205515	0.162501	-0.15418	0.0575992	0.936668	-0.359973	1.13352	-0.421302	0.491564
TCGA-EY-A1GQ	18.1333	0	76	3	1	0.0695129	0.0515167	0.144983	-0.435082	0.598635	1.03256	1.12914	0.59239	1.50115	1.94613	0.187504	-0.588937	0.110513	0.417379	-0.322392	0.294643	-0.0560502	0.388571	0.191394	0.0498675	1.33197	0.0142827	0.393285	-0.0130181	-0.13355	-0.0320832	-0.58514	0.321008	-0.0264702	-0.561736	1.30933	0.0997958	0.911646	0.121336	-0.271904	-0.0780368	0.748768	-0.261069	0.0388827	0.324265	-0.153341	0.788695	-0.232276	-0.248932
TCGA-EY-A1GH	23.6333	0	70	2	1	0.0888843	0.176009	-0.033768	0.210016	-0.334009	0.182228	-0.0755435	-0.543517	0.252598	-0.0849449	0.260046	-1.11602	0.433253	0.0805967	-1.41342	0.300216	-0.0987903	-0.604465	0.272713	-0.204752	-0.381387	0.0064799	0.600445	-0.407925	-0.436267	0.0870607	-0.898043	-0.147979	-0.0199641	-0.0491976	-0.325519	-0.176851	0.186117	-0.0252993	-0.0736956	0.195739	0.27136	-0.359465	-0.183649	0.53075	-0.615233	0.447576	0.196465	1.04822
TCGA-EY-A1GI	23.6333	0	52	2	1	-0.0437163	0.0985423	-0.253201	-0.0709836	-0.815047	0.825542	-0.362504	-0.492571	1.1528	0.628469	-0.127553	-0.970758	0.0524179	0.194068	-0.803384	0.0732366	-0.442016	0.316895	-0.0862037	-0.541226	-0.594515	-0.198493	-0.21501	-0.209339	-0.00999246	-0.0754521	-0.51836	-0.0866397	-0.0358648	0.623251	-0.951724	-0.3589	0.513561	-0.0218074	0.192025	0.291905	0.735452	-0.00908362	-0.130605	0.194542	-0.827087	0.0869607	0.0441171	0.241288
TCGA-EY-A1GJ	24.2333	0	73	3	1	0.143128	-0.231827	0.245603	-0.130311	-0.690028	-0.820929	-1.02058	-0.23417	-0.267056	-0.267299	-0.154262	-2.66892	0.909542	0.845858	-1.65312	0.163009	-0.631697	-0.123769	0.881433	0.0711276	-0.605063	-0.144731	0.839034	-0.0649549	-0.274421	0.0381169	-0.85837	-0.322196	0	-0.409986	-0.64259	-0.141933	-0.507544	0.0172416	0.0633678	-0.0424438	0.649739	0.50543	-0.132103	0.402475	-0.365595	0.383876	0.395934	1.72598
TCGA-EY-A1GK	23.1	0	74	3	1	-0.157479	-0.192989	-0.121928	-0.345815	0.157309	-0.04385	-0.194815	-0.166347	1.72934	1.53431	-0.152804	0.0679317	1.09902	-0.388833	-0.161159	0.150169	-0.351201	0.0848639	-0.521486	-0.269889	0.401561	-0.5066	-0.0485687	0.195841	-0.164016	-0.0727037	1.02221	0.203736	-0.419145	2.32604	1.45953	-0.234612	-0.228923	-0.324821	-0.354014	-0.0456163	-0.150315	-0.261835	-0.288418	0.785019	-0.724574	0.409977	-0.750359	-0.277014
TCGA-EY-A1GP	19.1	0	54	1	1	0.278718	-0.0829069	0.449069	0.214532	0.591927	-0.857973	-0.840095	-0.778505	-0.49463	0.191277	-0.636347	-2.80818	-0.318371	-0.142065	-1.58269	0.771677	0.857712	-0.592742	0.349303	-0.129006	-0.591385	0.280029	0.175677	0.157294	0.0434226	0.309361	0.244337	-0.211134	0.0164331	2.56681	0.371401	-0.122234	0.591825	0.450912	0.718604	-0.0804522	-0.494406	0.049937	-0.0041018	0.998166	0.0222477	0.216469	-0.238868	0.697542
TCGA-EY-A1GL	14.1333	0	51	2	2	0.153966	-0.582433	0.184594	-0.787105	0.778029	0.630273	0.67811	-0.019469	-0.66136	-0.591688	0.406645	0.282646	-0.411485	-0.81172	0.0136585	0.135677	0.429849	0.288529	0.261053	-0.1734	1.95209	-0.00346159	0.948621	-0.208542	0.686615	0.0587678	-0.596686	0.277345	-0.0286663	0.796222	1.52933	-0.305817	0.71075	-0.535772	-0.146762	-0.0691289	0.186253	-0.373809	0.326751	1.291	-0.774894	-1.50059	0.462807	-0.125303
TCGA-EY-A1GU	12.6	0	66	2	1	-0.124504	0.175735	0.0576354	-0.360821	0.315418	-0.572404	-0.758372	-0.444855	1.15593	1.21492	0.143659	0.419346	0.349837	0.698004	0.0105562	0.32814	0.229093	-0.670716	0.0139127	-0.412732	1.06984	0.479838	-0.249861	-0.0727169	-0.147683	0.122828	0.0989	0.384219	0.221756	-0.315358	-1.67428	-0.31294	0.141012	0.014985	0.530912	-0.18435	-0.403993	0.120815	-0.191327	1.79322	-0.894687	-1.03129	0.321171	-0.211118
TCGA-EY-A1GR	17.8667	0	67	3	1	0.267935	0.157179	-0.257152	-0.536077	0.0953125	1.42028	0.792566	-0.476472	1.02221	0.873579	-0.203156	0.219998	1.60564	-0.0515531	-0.490224	0.642266	0.528068	0.080419	-0.069162	0.0220682	0.619413	-0.10187	0.314225	0.256306	-0.165602	0.246042	-0.232333	0.879176	-0.123804	-0.592542	0.111397	0.179844	-0.263704	0.0250711	-0.0645431	-0.108959	0.752115	0.394518	-0.159911	0.136286	-0.595131	1.39712	-0.309955	1.27676
TCGA-EC-A1QX	7.43333	0	71	3	1	0.201407	0.439854	-0.0538422	0.223665	-1.12641	0.268695	0.407446	-0.364013	1.53644	1.48719	-0.396227	-0.588238	-0.296175	0.132827	-1.456	-0.893853	0.0326317	-0.698144	-0.0152226	0.0599045	-1.10455	0.339809	-0.499945	-0.194779	0.17564	0.189282	0.545935	-0.149818	0.353902	2.29616	-0.185012	0.0890735	0.844611	0.130542	0.855221	-0.207491	0.00231376	-0.0619054	-0.00153731	1.02003	-0.20559	0.481311	-0.046197	0.903084
TCGA-B5-A1MW	14.9	0	55	3	1	-0.224948	0.0840797	-0.189248	-0.399798	0.308815	-0.056756	-0.0757454	-0.509754	1.66249	1.50515	0.422906	0.216535	-0.62602	0.325354	-0.406202	-0.0720575	0.330493	-0.713043	-0.0483227	-0.5052	1.38567	-0.0546024	-0.253184	-0.103511	-0.440967	-0.2277	0.126877	0.154794	-0.100864	-0.0819631	-0.160805	-0.277782	0.103136	0.200045	-0.182642	0.000944066	0.304347	-0.177315	-0.219107	1.14052	-1.21365	0.813199	-0.231732	2.40593
TCGA-B5-A0KB	4.13333	0	62	3	1	0.217827	0.51059	-0.307034	-0.761667	-1.38293	0.216194	0.83346	-0.555597	-0.550653	0.222354	0.0247207	-0.221361	0.450163	1.56464	-0.652346	-0.71521	0.447518	0.109312	0.162905	0.0916961	-0.7944	0.0754762	0.529025	-0.353472	0.345718	0.29468	-0.458325	-0.275338	0.150273	0.85023	0.959527	0.496536	0.171435	0.428838	1.16526	-0.183599	0.496903	-0.0958667	0.159483	0.146648	0.154239	1.32116	0.0852281	1.41004
TCGA-B5-A1MX	11.8333	0	47	3	1	-0.261447	0.392076	-0.312584	-0.168393	-0.0258789	0.255035	0.136327	0.0455679	2.88986	2.46047	-0.102231	0.127185	-0.106006	0.377524	-1.66506	0.0451312	0.625876	-0.934882	0.270981	-0.587266	1.39232	0.0734946	0.341983	-0.523103	-0.315207	0.0541815	-0.601068	0.185613	-0.0685638	1.95646	-0.34723	-0.466837	-0.63183	0.410652	-0.135161	0.429568	0.876339	-0.39242	-0.0444634	0.661429	-0.645547	1.06119	0.600359	0.501047
TCGA-B5-A11L	46.5333	0	71	2	1	-0.347582	-0.343069	0.708526	-0.107092	0.142869	-0.459422	-0.693954	-0.00367963	0.398625	0.69901	0.174733	-0.302249	0.416687	-0.62113	0.132849	-0.926801	0.0224245	0.421803	-0.53683	-0.0887066	0.681425	-0.284178	-0.403996	0.5035	0.0610928	-0.198731	0.356023	0.153551	-0.435032	-0.552153	2.83086	-0.361355	-0.626539	0.553576	-0.379007	0.196044	-0.611142	-0.453098	-0.456608	0.20169	-0.330751	-1.64972	-0.554512	-0.526617
TCGA-B5-A0JU	49.4333	0	57	2	1	0.281775	-0.164147	-0.264823	-0.0222894	0.456031	0.615426	0.508801	-0.604524	1.16547	1.3502	0.372245	0.350494	-0.24738	-0.0920911	-1.60372	0.366551	0.11599	0.644797	0.143705	-0.333866	2.31205	-0.0530543	-0.0542306	0.0360068	0.618717	0.176666	-0.303104	-0.164037	-0.176392	-0.61988	-1.12318	-0.2527	0.46598	-0.0961643	-0.155125	0.306497	0.208634	-0.308198	-0.0410122	1.58003	-0.793891	-0.00147386	0.0146544	-0.267942
TCGA-E6-A1LX	23.7	0	40	3	1	-0.223334	0.795865	0.290206	0.629916	0.662391	1.24328	0.999302	-0.396333	2.24264	1.72357	0.193478	0.209248	-0.0730428	1.15285	-0.047442	0.205031	-0.0673843	-0.234514	-0.158328	-0.489246	1.66005	-0.223458	-0.305542	-0.332575	0.486668	-0.167189	-0.824276	0.427964	0.101882	0.229927	0.200946	-0.664325	0.0298017	0.278266	-0.402408	-0.126397	0.938167	-0.341077	0.0473889	0.613008	-1.10114	1.56286	-0.024241	-0.327226
TCGA-D1-A1NY	17.1	0	67	3	1	-0.129233	0.0189469	0.0557015	0.125188	-0.464119	0.275067	0.707042	0.233894	0.736952	1.01342	0.485583	0.401506	0.567121	0.74296	-0.906329	-0.354933	0.644436	0.478577	0.239095	-0.469302	1.38804	0.256444	-0.403065	-0.683839	-0.302683	0.000232282	-0.301523	-0.0648264	-0.0488554	1.97924	-0.455944	-0.480607	0.407307	0.307008	-0.0116413	-0.32405	0.108006	-0.357857	0.133087	0.875882	-0.746626	1.504	1.49187	0.907164
TCGA-D1-A1O5	15.2667	0	61	1	1	-0.135102	-1.26438	0.211977	-0.37852	-0.155867	0.216178	0.0948736	0.348252	2.79791	2.28184	0.662529	0.0308212	0.336828	0.618209	0.445518	0.298523	0.628405	-0.918437	0.340491	-0.389045	1.79116	0.204913	-1.13694	-0.0915981	-0.412142	0.00759094	-0.63958	-0.0331586	0.106717	-0.763685	-0.224761	-0.493211	0.843053	-0.243213	-0.215546	0.528152	0.249853	-0.278832	0.104105	-0.523404	-0.753965	-0.787341	-0.20969	1.89965
TCGA-D1-A1NS	1.43333	0	53	1	1	0.18948	-0.543152	0.023615	0.376199	0.19875	0.138728	-0.0479372	-0.484546	2.98581	2.85785	0.834437	0.304015	-0.32484	-0.0125903	-0.957432	-0.0912001	0.00522764	-0.390942	0.23754	-0.173432	1.6288	0.0703128	-0.307374	-0.107624	-0.157126	0.167847	-0.00343686	0.444616	0.0818897	0.803702	-0.456117	-0.0803405	0.1096	-0.27583	0.0434177	0.320319	0.0893342	-0.072432	0.027749	0.992346	-0.491102	-1.09133	-0.296398	0.245011
TCGA-D1-A1NZ	18.2667	0	60	1	1	0.380296	-0.707607	1.55797	-0.555671	-1.8608	-0.65031	-0.346199	0.362329	0.0920159	0.646881	0.187378	-0.156764	1.5796	0.141673	0.234173	-0.736255	-0.170183	-0.14047	0.127921	-0.00993844	-0.604678	-0.206664	-0.326323	-0.364468	0.00439973	0.1937	-0.34333	-0.171672	0.253509	0.191632	3.38196	0.368622	0.650546	0.0868786	-0.00906746	0.212838	0.151095	-0.213195	-0.282211	-0.0583357	-0.229111	-0.602733	0.0146544	0.189778
TCGA-A5-A1OJ	9.73333	0	31	2	1	-0.393074	-0.641974	0.471324	0.639471	-0.0833993	-0.178102	-0.297265	-0.14936	2.56246	2.19849	1.25509	0.0699144	-0.305589	0.102012	-0.396601	0.362815	0.513133	-0.706888	0.41457	-0.299446	1.97476	0.0826995	-0.0576941	-0.181233	-0.476825	-0.0382913	-0.458271	0.0422342	-0.280795	2.71533	2.66053	-0.516973	-0.260616	-0.388116	-0.174683	0.0535326	-0.204657	-0.486886	-0.127573	1.02734	-0.53143	-1.87023	-0.188393	0.29998
TCGA-EO-A1Y7	8.1	0	65	3	1	-0.0347049	-0.142445	-0.356732	0.460526	0.657757	0.499816	0.656599	-0.0850456	1.69624	1.31447	-0.290235	0.182877	0.258591	0.863026	-1.34822	-0.153432	-0.257662	-0.417732	-0.500707	0.102061	0.0455762	-0.361544	0.797325	0.40448	0.150386	0.146739	-0.374026	0.100972	-0.0635659	0.823529	-1.03162	0.133536	-0.00996645	0.0656602	0.0152073	0.228	0.600577	0.718651	-0.15286	1.72758	-0.0374847	1.7225	-0.305063	0.0225221
TCGA-EY-A215	19.1333	0	60	3	1	0.0202747	1.42523	-0.18702	1.28379	1.19962	1.02673	1.63902	-0.412208	0.885227	1.17358	0.0306608	-1.45106	-0.053063	1.22025	-0.39976	1.11093	-0.0328802	-0.87086	-0.456996	-0.218093	0.52072	-0.187233	0.200489	-0.258122	-0.321943	0.350269	0.00359947	0.565895	0.0219348	1.52486	-0.795245	-0.240737	0.333372	-0.171359	-0.0487963	-0.275943	0.461343	-0.0106909	0.0697172	1.91057	-0.68673	1.42161	-0.293948	1.52687
TCGA-BG-A220	14.4667	0	69	3	1	-0.320549	0.413126	-0.0495636	0.655692	0.625485	1.12926	1.0841	-0.0505433	0.788738	0.556858	0.236431	0.747799	-0.22651	0.0179005	-0.406359	0.372654	0.0218942	0.502521	-0.532168	-0.455561	1.4149	-0.402925	0.712338	0.0589639	0.0409688	0.103157	-0.0825135	0.367973	0.00879643	-0.249753	-1.19203	-0.3323	0.356529	-0.0550371	-0.180208	-0.034701	0.713084	0.028294	0.177771	-0.596178	-0.649871	1.48673	-0.243834	1.22754
TCGA-BG-A221	1.83333	0	84	3	1	-0.153627	0.479893	-0.149191	-0.00151268	0.288411	0.635219	0.795022	-0.033574	2.64997	2.15265	-0.164456	0.40566	-0.456621	0.761687	-0.914278	-0.664191	-0.807587	-0.458963	-0.257084	-0.315447	0.60393	-0.132309	-0.34135	-0.0899756	-0.0232061	0.174769	0.122746	0.196468	0.104032	2.16211	-0.302599	0.269502	1.26701	-0.184483	0.0843058	-0.0861775	0.618019	0.0153569	-0.0221662	1.01008	-0.515085	1.30959	-0.022296	0.639849
TCGA-BG-A222	9.7	0	49	3	1	-0.143554	0.456336	-0.0894777	-0.295946	1.02033	0.581192	0.769215	0.401876	3.42038	2.82875	0.378458	1.0971	0.573773	1.33643	-1.51853	-0.910107	-1.31481	-1.08288	-0.266151	-0.29031	1.1029	-0.140659	-0.45346	-0.132561	-0.291047	0.140469	-0.272436	0.283984	0.100554	0.511304	-0.917714	-0.16398	0.634435	-0.318561	-0.00672361	-0.135701	0.333386	-0.0670082	0.432513	1.80489	-0.651115	0.590313	-0.176371	0.804023
TCGA-AJ-A23O	10.4	1	69	3	1	0.0443274	-0.0523868	0.181786	-0.349836	0.731253	-0.607838	0.362096	0.309197	1.04544	0.891379	0.0119457	-1.63213	-0.145527	1.02393	0.287498	0.743002	-0.258599	0.17284	-0.154309	0.0410394	0.0936474	0.0284025	0.476178	-0.145237	0.26797	0.252037	0.629491	0.00869428	-0.0462619	1.02792	-0.144366	0.876813	0.489211	0.156592	-0.0782938	-0.277856	0.18869	0.0266871	-0.0381467	0.172209	-0.227944	1.04586	-0.116024	1.0439
TCGA-EC-A24G	1.53333	0	57	3	2	0.0363568	0.305331	0.109747	-1.12012	0.52355	-0.226274	0.799119	0.443021	-0.495512	-0.78825	0.716233	0.975401	0.933593	0.466168	0.965177	0.335358	-0.125235	-0.0182529	-0.190056	0.0492994	0.898467	-0.20097	0.127999	0.0311507	0.237071	0.135022	-0.552841	0.119832	-0.161898	0.988105	1.43547	-0.00194153	0.124013	-0.248454	-0.0584259	0.315764	0.287427	-0.0717306	0.159771	1.15729	-0.199516	0.168611	-0.152414	0.845249
TCGA-BG-A2AE	0.533333	0	57	3	1	-0.0898133	0.0587312	-0.131864	-0.179972	0.826206	-0.252506	-0.454272	0.0873302	-0.842582	-1.20211	-0.280593	0.207552	-0.0244382	-0.329236	-1.45131	-0.329319	-0.0790688	-0.59435	-0.326445	-0.181266	0.540315	-0.355104	-0.0121423	-0.122273	0.765056	0.00478603	0.0782222	0.134226	0.0595612	0.628619	-0.299734	-0.0591018	-0.508178	-0.44559	-0.184673	-0.183034	-0.202043	-0.272765	0.172904	1.64142	-0.6321	0.482503	-0.263415	1.05775
TCGA-AX-A2H8	60	0	64	3	1	0.0944474	0.318402	0.430242	1.57896	-0.0160896	-0.743548	-0.766763	-0.267072	-0.177416	0.15768	0.171823	-0.331038	0.389538	1.17566	-0.623428	-0.661443	1.14601	0.299499	0.240083	0.136757	0.695445	0.0782409	0.551125	-0.13917	-0.00644007	0.0681176	0.357887	-0.395565	-0.0473047	1.02551	-0.37917	0.0941653	0.0840705	-0.254614	0.343724	-0.0890027	0.652518	0.245195	0.267315	-0.108293	-0.0598914	0.964197	-0.132886	0.827757
TCGA-AX-A2HG	22	0	56	3	1	-0.188369	0.540224	-0.292263	-0.471299	0.650698	0.356451	0.166897	-0.457027	1.61497	1.0204	0.223316	0.776701	-0.805044	0.181511	-1.21054	0.518473	0.816183	-0.676555	0.255603	-0.32948	0.6126	-0.0312689	-0.460672	0.159492	-0.608826	0.142058	-0.0568339	0.120989	-0.205473	1.56781	0.605747	-0.344491	0.503036	0.0285062	-0.184439	0.0429434	0.123544	0.52498	0.277299	0.62167	-0.456903	1.42424	0.0746866	-0.259521
TCGA-AX-A2HH	17.9667	0	60	3	1	-0.282291	-0.0777993	0.0797092	0.0119019	1.03808	0.420505	0.327131	-0.0208805	0.88358	1.03442	0.124105	0.415276	-0.79501	0.126656	0.484748	-0.154438	0.12142	-0.177943	-0.113044	-0.281144	0.847219	-0.0601411	0.140922	0.278908	-0.1315	0.00818903	-0.00815393	0.330104	0.0236938	-0.735063	0.64808	-0.298979	0.597385	-0.191261	0.0499712	-0.234907	0.163218	-0.320641	0.495795	0.140057	-0.761021	0.580571	-0.0834336	-0.0125479
TCGA-AX-A2HJ	27.7	0	35	3	1	-0.0033125	0.193149	-0.28028	-0.744897	0.949953	0.636003	0.769319	0.0752531	-0.0927187	-0.154927	0.105871	0.636034	1.42346	0.854682	0.186766	0.66201	0.0652422	0.439786	-0.0407104	-0.16583	1.17876	-0.303279	1.06961	0.115477	-0.181654	0.265882	-0.457546	0.304436	-0.127036	-0.431726	1.65879	-0.0719736	0.0195033	-0.253896	-0.160599	0.396426	-0.0472532	-0.175203	0.14154	-0.475764	-0.612889	1.32199	-0.0813952	1.00815
TCGA-AX-A05S	13.7667	1	81	3	3	-0.0829955	-0.881194	-0.0592181	0.0685931	0.23214	-0.00125403	-0.236367	-0.058213	2.89306	2.30601	0.262801	0.170885	0.118781	0.13376	-0.167822	-0.0110196	-0.28521	0.335629	-0.39613	0.0228753	0.358339	-0.323969	-0.0144363	0.143943	-0.29571	-0.0508771	0.0195405	-0.111068	0.0280139	0.718992	-0.978868	0.125619	0.320991	-0.227985	-0.0589569	-0.147105	0.516818	0.254881	0.0554382	0.729819	0.0152373	-0.00222565	-0.243385	0.241258
TCGA-AX-A05Z	47.1	0	37	2	3	0.213325	0.844144	-0.315246	-1.04153	0.632999	-0.142545	-0.038887	-0.71847	-0.12088	-0.141742	0.359096	0.06848	0.12219	0.0784552	-2.66051	0.322808	0.522716	-0.0620234	-0.1019	0.442122	0.905163	0.0297914	0.052828	0.0758807	0.31014	0.250974	0.497277	-0.230059	0.192994	1.22175	-1.14069	0.140639	0.243319	0.217412	0.0959001	0.163207	-0.132679	0.0919545	-0.091589	0.597852	0.654403	0.743165	0.114699	-0.380293
TCGA-AX-A06F	51.8	0	59	3	4	-0.123332	-0.300719	-0.0604927	-0.349375	-0.100249	1.1248	0.69679	-0.48463	1.18541	0.887092	-0.416124	-0.266156	-0.264955	0.568768	-0.297402	0.398337	0.107389	-0.802329	-0.0799128	-0.036438	1.13299	-0.377111	-0.0576941	-0.216616	-0.67229	-0.138217	-0.252454	-0.217298	-0.356298	1.31096	-0.72352	-0.200305	-0.431127	-0.0858449	-0.394588	-0.10233	-0.48638	-0.341603	0.0650412	-0.120987	-0.0861119	1.09574	-0.151924	1.58689
TCGA-AP-A054	23.6333	1	64	3	3	0.334976	0.380773	-0.134959	-1.45492	0.443178	-0.961773	-0.504242	0.29208	-0.489507	-0.551143	-0.142884	-0.0992344	0.000555174	0.377173	-0.530645	0.213163	0.212842	-0.155585	0.139545	0.0840831	0.268226	0.511352	-0.0457988	-0.138337	0.530375	0.320319	0.898276	0.256598	0.164955	-0.0622454	-0.648949	0.256172	1.02952	0.288289	0.392481	0.00924841	0.0123544	0.179779	-0.223969	0.510491	0.633589	1.07372	0.433889	0.225509
TCGA-B5-A0JY	33.4333	0	50	3	3	-0.158519	-0.244366	-0.232275	-0.555915	0.829087	-0.560384	-0.768529	0.0457507	1.44069	1.48178	-0.42885	-0.6164	-0.551652	0.683375	-0.651141	0.408535	0.332535	-0.22373	0.226141	-0.19852	1.02387	-0.352288	0.0148587	-0.34201	-0.609103	-0.120257	-0.791167	-0.0759248	-0.221119	0.738124	0.272102	-0.159635	0.0523056	-0.0573212	-0.378281	-0.094481	-0.28177	-0.276647	0.00705396	0.571065	-0.228957	1.73604	0.128187	-0.048956
TCGA-A5-A0GA	18.1	1	67	3	3	-0.451028	0.411878	0.621935	0.156131	-0.0515746	0.678925	0.163372	-0.0529014	2.54777	2.13206	0.354045	-0.0457443	-0.721716	0.772034	-1.39192	-0.127097	-0.0719644	-0.377951	-0.265407	-0.463728	1.18024	-0.249076	-0.57901	0.0179283	-0.550926	-0.192621	0.680147	-0.179171	-0.0608088	0.631094	0.322967	-0.568375	-0.45237	0.546908	-0.291702	-0.114172	0.0272621	-0.367922	-0.382283	0.840611	-0.50831	0.934306	-0.135329	0.746283
TCGA-B5-A0JZ	29.0333	0	60	3	3	0.0446995	-0.523768	-0.00850251	-0.768897	0.968768	0.195889	0.185183	0.0194599	2.03661	2.15919	0.231483	-0.415919	-0.00571025	-0.374498	-0.59148	0.712332	0.0597605	0.283302	0.333338	-0.119501	1.63534	-0.0386462	0.724886	-0.240949	-0.385635	0.0693473	-0.465459	-0.172466	-0.123371	0.485422	-1.14049	-0.114116	-0.074671	-0.125642	-0.247891	-0.21552	-0.00167418	-0.0966244	-0.208881	0.674002	-0.258926	0.280466	-0.0152073	-0.176842
TCGA-AX-A06D	12.4333	1	82	2	3	0.263243	-0.581016	0.133556	1.89984	0.698408	-0.558522	-0.825114	-1.12394	-0.270045	0.167908	0.290632	-1.27553	-0.72533	1.04069	-1.12896	0.612535	1.06244	-0.642196	0.194423	-0.00395914	1.0421	0.036489	-0.624877	0.307668	-0.360584	0.197128	0.0357747	0.0583553	0.0605201	-0.475856	-0.862956	0.182125	-0.0363154	-0.27525	-0.0350371	0.521994	-0.142208	0.117728	-0.335731	1.08314	0.0940917	-1.07674	0.295346	-0.520116
TCGA-AP-A0LM	27.5	0	33	3	3	0.090075	-0.0466951	0.0261516	-0.614684	0.890246	-0.690293	-0.254858	0.0035821	-1.26688	-1.01239	0.426407	0.835259	-0.342555	-0.200642	-0.262289	0.00079884	0.86528	-0.0973223	0.0865578	0.0720356	1.41715	-0.0581504	0.430441	-0.344841	-0.431892	0.16285	-0.270157	-0.0723387	-0.0811189	3.51501	0.360795	-0.0292601	0.147495	-0.107561	0.126064	-0.107857	0.222773	-0.271008	0.253984	1.57596	0.154606	0.584939	0.166039	1.9146
TCGA-AP-A0LF	3.43333	0	82	3	4	0.147505	-0.111962	0.198192	0.67208	-0.0351114	0.108645	0.091917	-0.784478	-1.53781	-0.72286	-0.179661	-0.674725	-0.547692	1.30465	-0.19882	-0.125134	0.180981	-0.465116	0.317946	-0.14076	-1.6318	0.17531	0.480893	-0.0346968	-0.271631	0.0605006	-0.0595277	0.0592454	0.0328953	2.03049	-1.71376	0.398219	-0.478716	0.01059	0.264826	-0.0493898	0.486346	0.134025	-0.274563	0.670777	-0.0807093	0.375387	-0.0958728	1.40404
TCGA-BG-A0M7	38.9	0	60	2	3	-0.296905	0.18044	-0.414216	-0.0322568	0.847533	-0.0887518	-0.406741	-0.739885	1.47307	1.44229	0.39736	1.02289	1.16718	-0.909075	-0.883257	0.708689	0.325697	-0.549528	-0.130727	-0.147383	1.2722	-0.165987	0.0287428	-0.106904	-0.589189	-0.0325045	-0.570515	-0.0171765	-0.179473	-0.279214	-0.351276	-0.377397	-0.997124	-0.0990081	-0.347455	0.343235	0.0571313	-0.302794	-0.175322	1.72822	-0.712962	-0.191126	1.2584	-0.193413
TCGA-BG-A0MS	31.2333	0	53	3	3	0.0473284	0.145158	-0.0691471	0.174469	0.97863	0.0612152	-0.449667	-0.375073	1.53835	1.34857	0.141636	0.294361	0.994176	-0.41476	-0.545493	0.377431	0.502442	-0.0256233	0.0978963	-0.0825393	0.760207	-0.28642	0.322197	-0.0592801	-0.150482	0.0851457	-0.331548	-0.234991	-0.186389	-0.32503	-0.527344	-0.148624	-0.0569345	0.0471937	-0.0150822	0.171754	0.303111	0.0316396	-0.0118108	1.09183	0.153229	-0.394352	0.00350401	-0.435206
TCGA-BG-A0MU	7.7	0	78	1	3	-0.257237	-0.322089	0.753598	0.0997533	0.467402	0.411077	-0.384231	-0.149645	2.23535	2.11135	0.724825	0.0125555	0.24628	-0.592178	0.220349	0.607523	0.691817	0.674355	0.309098	-0.382092	0.380428	0.347833	0.447632	-0.587648	2.00901	-0.0303348	-0.481484	-0.105195	0.134813	-0.300107	-1.44854	-0.462994	-0.322457	-0.304595	-0.179279	0.168897	0.357443	-0.238109	-0.117799	0.548961	-0.780743	-0.502824	0.021683	-0.86018
TCGA-BS-A0T9	47.6	1	39	3	4	0.224018	-1.23314	0.135821	-0.530308	-0.13548	0.38158	0.12813	-0.0728092	1.47787	1.05759	0.265795	0.359043	-0.518197	-0.0996173	0.211346	-0.178712	0.856431	-0.123049	0.923059	-0.19987	1.21954	0.0599375	0.108514	-0.286448	0.451603	0.0162267	-0.66263	-0.234484	0.0993197	2.16035	-0.0619061	-0.0465699	0.641022	-0.15525	0.139848	-0.00368692	-0.281814	-0.0273812	0.298326	-1.04928	0.153134	0.617216	-0.101435	0.513858
TCGA-BS-A0TA	23.8	0	58	3	4	-0.115563	0.269684	-0.04516	0.00582183	0.612353	0.135103	-0.197246	-0.32535	0.314243	-0.00680323	0.0525176	0.243632	0.132532	-0.174438	-0.660272	0.0120124	1.12469	-0.577403	0.0275302	-0.0908244	0.215771	-0.0536541	-0.173912	-0.34177	-0.504732	-0.117385	-0.0454689	-0.175771	-0.172612	3.54473	-0.196153	-0.0905999	-0.123004	0.227342	0.0174455	0.0920505	0.0396352	-0.227513	0.0857379	0.507684	-0.132708	0.427585	-0.116525	1.55014
TCGA-BS-A0U8	60	0	55	1	3	-0.139654	0.197195	0.00252428	-0.339085	0.7763	0.13933	-0.0349773	-0.342696	0.880812	0.969358	0.375664	0.593548	-0.338809	-0.468128	-2.21916	0.650832	0.0944543	0.168323	0.101153	-0.272637	2.53756	-0.151737	-0.141769	0.0208259	-0.677776	0.0259508	-0.299382	-0.0628622	-0.194931	-0.846204	-1.51521	-0.441917	1.07586	-0.0561288	-0.214562	-0.223668	0.72991	-0.307125	0.122663	0.865905	-0.508811	0.518922	0.0124509	-0.14596
TCGA-BG-A0VT	7.46667	0	56	2	3	0.0514424	-0.326154	0.38126	-0.334632	0.448415	-0.241128	-0.537176	-0.744938	0.215551	0.10728	0.30741	0.013327	0.226117	-0.253738	0.881054	0.278537	0.114462	1.34813	0.0523657	0.0122106	-0.240475	-0.231857	1.43499	0.176133	0.957222	0.191098	-0.232006	-0.0751377	-0.0731965	0.234053	-0.905097	0.105344	0.644976	-0.281484	-0.077211	0.0268741	0.620754	0.330618	0.0581787	0.426827	0.394874	-0.620506	-0.176273	0.0573056
TCGA-B5-A121	16.8	0	57	1	3	-0.0715664	-0.167161	-0.435135	-0.31336	1.27443	-0.513952	-0.634088	-0.451909	0.669152	0.389422	0.105848	0.540181	0.698348	-1.02964	-0.0964768	0.664837	0.0922006	-0.0715908	0.0687859	-0.214786	2.01907	-0.151712	-0.0210448	0.503014	-0.360436	0.00885651	0.0488671	0.0192623	-0.168137	-0.34955	1.14033	-0.317598	-0.124666	-0.0816531	-0.400049	-0.00863392	-0.0662252	-0.175744	-0.0708469	0.919583	-0.593606	-0.465471	-0.306881	0.734333
TCGA-B5-A11X	19.8333	0	66	3	3	-0.245362	0.570797	0.312817	0.0271964	0.957419	0.321748	0.188364	-0.653332	-0.0498909	0.618723	-0.354404	-0.999463	-0.842772	-0.286279	-1.0496	0.400935	0.54371	-1.18968	0.439817	0.109434	0.426042	0.190845	-0.44575	-0.186629	-0.535983	0.0163377	-0.537969	0.0631729	-0.092854	1.80533	0.206795	-0.266118	0.224529	0.14031	-0.00556075	0.199288	-0.331447	-0.226898	-0.175322	-1.33099	-0.214265	1.19745	0.487857	1.13697
TCGA-B5-A11U	16.9667	0	74	3	4	0.0670883	-0.117693	0.047049	-0.702893	0.515579	-0.644581	-0.666194	-0.313839	-0.349103	-0.0863157	-0.424376	-1.30848	-0.280682	-0.151769	-0.472933	0.67111	0.152508	1.3334	0.0724762	-0.0787278	0.955991	-0.0266711	0.553915	0.00939153	0.513836	0.240116	-0.339025	-0.208687	0.0157181	1.32143	0.29382	0.352683	0.945108	-0.346713	-0.0287271	-0.124582	-0.138255	0.19142	-0.423826	0.0833017	0.149425	0.662531	0.0910009	0.298946
TCGA-B5-A11I	60	0	65	3	4	0.361444	0.312399	-0.208591	-1.14208	-1.28796	-0.516091	0.402049	-0.0426584	-1.02134	-0.971459	0.250118	0.823153	0.613709	0.556909	0.838497	-0.513009	0.654081	-0.0440241	0.0993336	0.386938	-1.60042	0.107731	0.990565	-0.125591	0.454868	0.0338902	-0.348632	-0.109326	0.146439	1.56535	-0.586839	0.451794	-0.126937	0.216381	0.730673	0.0137546	0.70417	0.18452	0.380921	0.00193932	0.125518	1.75394	0.107556	1.76907
TCGA-B5-A11Q	32.5	0	64	1	3	0.284272	-0.206537	0.168952	-0.934018	0.954799	-1.19628	-1.11691	-0.415619	0.936992	0.806723	0.522289	-1.05141	0.740597	-0.545697	-0.742126	0.673773	0.229412	-0.887554	0.279555	-0.156589	1.2351	-0.0208135	-0.290097	-0.174817	-0.482074	0.0161105	0.00823199	-0.158633	0.0272604	-0.879711	-0.500487	-0.0719168	0.657807	0.0360575	-0.309156	-0.0350917	0.124704	-0.156984	-0.311459	0.287121	-0.167491	0.122136	0.437829	-0.661423
TCGA-D1-A163	33.0333	0	50	2	3	0.154572	-0.260617	0.0134069	-0.92998	-0.557476	-0.330049	-0.424459	-0.0375895	0.70146	0.847535	0.0539062	0.449576	-0.117212	-0.471889	-0.82541	0.622801	0.0655578	-0.159701	-0.0378171	-0.131478	0.943476	-0.0379193	-0.0330891	-0.487409	-0.340211	0.0514845	-0.049469	-0.325181	-0.00925608	1.48134	0.975595	-0.00766296	0.196661	-0.0345527	-0.133649	-0.103853	0.25473	-0.0608068	0.108674	1.13122	-0.101366	0.313768	0.562347	0.559277
TCGA-D1-A169	37.8333	0	63	2	4	-0.218467	-0.585099	0.223482	0.263188	0.616498	0.312606	0.0185053	0.27729	2.12011	2.17202	0.0367585	0.0853396	0.596052	0.26209	0.0269038	0.344424	-0.321527	-0.553148	-0.334755	-0.230295	1.11407	-0.201144	-0.240595	-0.194602	-0.0108217	0.0550033	-0.636877	0.0833456	0.0240678	1.33155	0.567583	-0.152293	-0.52269	-0.22373	-0.193133	0.288411	0.298992	0.159899	-0.499359	0.394062	-0.192143	-0.0122807	-0.261255	-0.68875
TCGA-D1-A15W	30.5	0	58	1	3	-0.064247	-0.627772	-0.0236136	0.271302	0.351988	0.089224	-0.329701	-0.229515	2.21642	2.1289	0.368433	-0.0763701	0.551265	-0.208939	-0.0371427	0.0522732	-0.415703	-0.711112	-0.396026	0.0362671	-0.615586	-0.310203	-0.703868	-0.0302855	-0.47831	-0.0929731	-0.558267	-0.0274324	0.00845696	-0.489622	-1.63791	-0.102534	-0.162603	-0.369747	-0.133402	-0.070967	-0.189509	-0.186358	0.0664619	0.906902	-0.283893	-1.14454	-0.32921	0.547534
TCGA-D1-A16N	31.5	0	51	3	3	-0.37417	0.127707	0.305737	0.860969	-0.114528	0.606929	-0.022386	-0.272513	2.22328	2.19051	0.326614	0.090492	0.987448	0.570081	-0.448825	0.0965959	0.110527	-0.388703	0.0402988	-0.488904	1.47185	-0.278923	0.39996	-0.114062	-0.593042	-0.293557	-0.701562	-0.279956	-0.230004	-0.525442	0.270457	-0.372618	-0.700053	-0.055438	-0.158411	0.472138	-0.00781091	-0.290663	-0.394832	-0.173248	-0.283151	1.4225	-0.294015	0.927616
TCGA-D1-A17U	23.2333	0	53	2	3	-0.175665	0.0399089	-0.473616	-0.560958	0.296459	-0.242417	-0.525304	-0.385771	0.868153	0.640754	0.121547	0.956585	0.621039	-0.208923	0.134915	0.182955	-0.226691	-0.289879	-0.458444	-0.212256	0.382084	-0.32915	-0.579628	0.28073	-0.0777859	-0.116657	1.4205	0.055229	-0.214432	-0.142154	-0.987005	-0.307571	-0.380076	0.904703	-0.21857	-0.232807	-0.261992	-0.188542	-0.083932	1.55954	-0.348647	0.114645	-0.527412	-0.0604067
TCGA-D1-A16V	4	1	78	3	3	-0.0416607	0.352178	-0.232282	0.38437	-0.0429115	1.40279	1.09469	0.144135	2.70415	2.54612	-0.265544	-0.203165	1.4803	1.12954	-1.52334	0.146071	-0.0266771	-0.335582	-0.356951	-0.0784454	0.449135	-0.309658	-0.217885	-0.145941	0.965065	-0.0518043	-0.951451	0.439937	-0.0216971	0.44252	-1.24811	-0.14316	-0.0661937	-0.174892	-0.151044	0.165234	0.0805257	-0.150959	-0.291582	1.2474	-0.560731	0.876483	-0.494442	0.58169
TCGA-BG-A186	13.9667	0	61	2	3	-0.226301	-0.889303	-0.0403729	0.056626	0.488684	0.412915	-0.0102602	-0.353049	2.50933	2.15789	0.340821	-0.449166	0.935622	0.0499333	-0.110435	0.1809	-0.0876784	0.769009	0.0118951	0.172752	2.01285	-0.143661	0.0856613	-0.0737255	-0.223284	-0.304891	-0.560938	-0.27003	0.164027	-0.519911	-0.361412	-0.214002	0.190605	-0.310354	-0.118846	0.189542	0.109505	-0.282932	-0.0624525	1.21417	-0.607029	-0.707252	-0.174614	-0.105419
TCGA-D1-A2G6	8.6	1	53	3	3	-0.267633	-0.197566	0.637828	-1.12535	0.400779	-0.597782	-0.319452	0.111984	0.520733	0.583846	0.349942	0.0467214	-0.364767	0.033244	-0.263999	0.344002	0.867776	1.20038	0.523332	-0.416643	1.19381	0.544635	0.115277	-0.55807	0.492703	-0.0319516	-0.0498162	-0.118472	-0.118887	-0.098878	1.7186	-0.236608	0.47979	0.347294	0.118547	0.0382598	-0.256994	-0.389584	-0.395592	0.446544	0.161948	-1.03788	0.134227	0.633579
TCGA-AP-A1E3	28.2333	0	45	3	3	-0.14099	0.119391	0.572846	-0.416127	0.71677	-0.380176	-0.206358	0.402512	0.741077	0.914057	0.422936	0.371271	0.0953867	-0.180963	-0.29371	-0.432745	1.26802	0.648986	0.598419	-0.189288	1.1764	0.201768	-0.126765	-0.633092	0.176124	-0.0622161	-0.488853	-0.412853	-0.156982	1.23345	2.43155	-0.00317854	-0.278689	0.511536	0.0627808	-0.199141	-0.00049134	-0.561876	-0.0334076	0.388713	0.0181982	-0.0804031	-0.0123962	-0.258639
TCGA-AP-A1DR	49.8333	0	59	2	3	-0.0864388	-0.489816	-0.257015	0.27994	-0.0461653	1.09568	0.937604	-0.0440426	1.37355	1.30583	0.0488246	0.0926223	0.154643	-0.038431	-0.0249879	0.310211	-0.248694	-0.207751	-0.292602	-0.363491	1.0855	-0.188459	-0.0285464	-0.105741	-0.568422	-0.267504	-0.492336	0.143263	-0.0119139	1.04311	-1.24544	-0.193213	-0.24546	-0.006418	0.0413846	-0.218302	0.177508	-0.234682	0.126479	2.19268	-0.798388	1.31956	0.165504	1.03714
TCGA-AP-A1E0	31.3333	0	40	2	3	0.167302	0.31969	0.0413617	-1.17819	0.238021	-0.372526	0.658022	-0.29942	-1.35837	-1.13865	0.492992	-0.00262562	0.481893	0.140507	0.261222	0.805469	0.756879	0.0896919	0.350788	-0.146665	1.88719	0.0368335	0.17556	-0.159362	-0.0297902	0.345293	-0.133448	0.663442	-0.211544	1.59338	0.687879	0.0918314	0.663979	0.277402	-0.182388	-0.00255774	0.436206	-0.131267	0.0626478	1.12458	-0.49339	2.12834	-0.167225	0.747493
TCGA-DI-A1NO	9.5	1	68	3	3	0.0220666	0.154962	-0.305192	-1.30713	0.25274	-0.0186146	0.194602	-0.0477534	-0.985916	-1.09099	-0.00623526	0.424145	1.05275	0.870048	0.503465	-0.0262768	-0.168312	-0.292868	0.0981829	-0.0805965	0.723771	0.133361	0.992982	0.0751362	-0.303124	0.099645	0.262052	-0.0627767	0.117116	-0.569628	-1.51478	0.152697	0.0528925	0.159784	0.178699	-0.128701	1.08973	0.2335	-0.149656	0.769823	-0.371548	0.467978	-0.275191	1.04093
TCGA-EY-A1H0	19.6	0	57	2	3	-0.0649363	0.396027	-0.273841	0.407094	0.741878	0.826939	0.70623	-0.352071	0.931009	1.28189	0.420438	0.384791	0.943202	0.289798	-0.0352622	0.127828	-0.0166342	0.0299038	0.112844	-0.373159	1.75473	-0.156332	-0.281468	-0.145368	-0.49444	-0.0666825	-0.686456	0.301555	-0.00348763	-0.417756	-1.0279	-0.360606	0.396182	-0.0830279	0.0043444	0.303247	0.395951	-0.172203	-0.175322	1.79209	-0.77869	0.282474	-0.0328566	0.0716065
TCGA-EY-A1GO	19.5333	0	65	2	3	-0.173924	-0.137263	0.386463	0.501161	0.580924	0.779323	0.627806	-0.226288	-0.385491	-0.214394	0.0548205	0.134516	-0.511964	0.256434	-0.0976705	0.149347	-0.150438	-0.601291	-0.495438	-0.277519	0.33082	-0.380819	-0.400901	0.0757263	-0.395859	-0.0977048	-0.687301	-0.0803912	-0.10365	-0.5948	0.196874	-0.23906	0.0185998	0.414301	-0.0151529	0.113618	0.940828	0.0919602	-0.0713633	1.62022	-0.700244	1.19691	-0.221503	-0.135095
TCGA-EY-A1GW	11.2333	1	73	3	4	-0.154957	-0.628833	-0.131254	-0.256116	0.418155	-0.726467	-1.11964	-0.0010465	-0.440653	-0.420892	-0.0906703	-0.0571191	2.00821	-0.786746	0.405268	-0.311451	-0.146743	0.742381	-0.396602	0.0393107	0.545755	-0.199385	0.0646416	0.232265	0.16366	-0.179977	0.327184	-0.0533138	-0.00379882	-0.848032	1.9765	-0.193494	-0.255693	-0.251699	-0.25835	0.069593	-0.602506	-0.299508	-0.387882	0.425437	-0.276258	-2.09559	0.190185	-0.00563342
TCGA-EY-A1GT	16.3333	0	68	1	3	0.128808	-1.28454	0.341615	0.23565	0.42811	-0.990141	-1.04258	-0.542611	-0.584885	-0.10028	-0.0230991	-1.47479	-0.388681	-0.431654	-0.366187	0.187001	0.521617	-0.715526	0.0300718	0.0667567	1.00311	0.164901	-0.100458	-0.0897013	-0.000693169	0.382174	0.193559	0.0800588	0.201397	-0.602528	0.593318	0.249287	1.42788	-0.00910517	0.191692	-0.276321	0.178678	0.00454454	-0.256538	-0.30478	-0.371548	-0.958839	0.670786	-0.515215
TCGA-EY-A1GX	6.56667	0	76	2	3	0.318346	-0.300429	-0.135306	-0.1552	0.575806	-0.0117253	0.167595	0.315664	2.57781	2.24758	0.417393	-0.452726	0.914682	0.0383943	-0.391106	0.674217	-0.299606	-0.645292	-0.0677706	0.161679	0.805299	0.0872661	0.511553	0.202539	-0.169421	0.155278	-0.1523	0.147137	0.0429804	-0.695104	-0.0895236	0.257726	-0.35291	-0.0774854	0.0998536	0.101348	0.382975	0.204584	0.183281	1.27252	-0.207959	-0.812928	-0.0537824	0.823507
TCGA-E6-A1M0	17.2667	0	56	3	3	-0.0364877	0.546805	-0.286617	-0.453475	0.853802	0.657275	0.628064	-0.237402	1.3304	1.78789	-0.058994	0.248991	0.412295	0.205102	-0.902356	0.882606	0.422037	-0.0817764	0.240083	-0.38025	1.20442	0.270936	0.686484	-0.0341695	-0.262439	0.42168	0.100959	0.419725	-0.101515	1.35419	0.144773	-0.427316	-0.479021	0.655609	0.104185	0.481416	0.601777	-0.0167755	0.152668	1.46984	-0.836115	1.82783	0.186485	0.636087
TCGA-D1-A1O8	5.73333	0	70	3	3	-0.155906	-0.276024	0.128666	-0.444963	0.475053	0.736924	1.00378	-0.15174	1.49672	0.937481	0.0745111	0.0616604	-0.915869	0.0119324	-0.0940214	0.474993	0.520675	-0.31344	0.504329	-0.451381	1.65997	0.301261	1.12356	-0.219002	1.6076	0.132657	-0.936104	0.224959	-0.157487	1.80411	-1.33604	-0.360142	-0.151838	0.255577	0.191124	0.60974	0.350988	-0.0756577	-0.103912	0.734592	-0.993554	1.09599	0.229716	-1.01029
TCGA-A5-A1OK	8.1	0	63	3	3	-0.316071	-0.242718	0.22764	0.535589	0.644519	0.550182	0.571878	-0.763367	2.43516	1.81228	0.145218	-0.206512	1.03883	-0.254837	-0.746576	0.573149	0.402091	0.368314	0.0400839	-0.38734	1.54655	-0.272656	0.164268	-0.203147	-0.208891	0.0796162	-0.998053	0.0255615	-0.363106	-0.975526	0.00958389	-0.321221	0.0947158	-0.580954	-0.399342	0.364755	0.284526	-0.30952	-0.00494325	0.288081	-1.01074	-0.69786	-0.0861711	0.472339
TCGA-AW-A1PO	0.566667	0	66	3	3	-0.245973	0.696939	0.33634	1.01261	-0.103973	0.544071	0.639079	0.434948	1.75792	1.78891	0.226974	0.369945	-0.112079	0.885033	0.676433	0.61739	0.281403	1.64508	0.0982635	-0.421361	1.65283	-0.102908	0.943596	-0.467852	2.35343	0.254467	-0.999005	0.59829	-0.200434	-0.0123251	-0.512022	-0.233682	-0.508554	0.017112	-0.152485	-0.0651958	1.39309	-0.108755	0.395771	1.45229	-0.761794	0.864871	0.199607	1.0994
TCGA-EY-A214	14.6	0	66	3	3	0.138739	-0.181856	-0.0940956	0.258122	0.0303607	0.240965	0.648009	-0.167336	0.0904134	0.504472	0.220216	-0.395961	-0.25958	-0.336443	-0.434079	-0.0156272	-0.128753	-0.615075	-0.0319762	0.255924	0.0591798	-0.103559	0.375139	-0.36975	-0.0825659	0.0863482	-0.163142	0.48539	-0.017793	-0.506208	-0.0879606	0.335123	-0.0648992	-0.346285	0.121057	-0.182767	0.0683185	0.20497	-0.175322	1.79115	-0.496536	0.123538	-0.0154307	-0.0784749
TCGA-BG-A2AD	0	0	63	3	3	-0.0417047	0.553617	0.33516	-0.436593	0.989553	-0.849048	0.219583	0.0523518	0.149841	-0.372997	0.33714	0.124959	-0.102026	-0.0273684	-0.813954	0.536943	-0.0892183	0.184448	0.101506	-0.0597085	1.09783	-0.170813	0.372539	0.175356	0.00845735	0.113971	-0.430175	-0.0378233	-0.105918	0.128648	0.511635	-0.0326897	-0.36056	0.0508929	-0.0469235	0.0464395	0.63133	0.0423373	0.548944	2.16764	-0.522449	2.0022	-0.0114643	1.50186
TCGA-AX-A2HC	33.8667	0	53	3	3	0.248302	0.819984	0.305371	-0.969029	1.55659	-0.581339	-0.301863	0.369595	-0.347474	-0.284484	0.0597113	0.851073	0.0605113	0.673442	-0.367989	0.860688	1.41561	-0.0332115	0.289922	0.0569053	1.7285	0.231916	-0.0109345	-0.0837479	-0.147022	0.331954	0.0255143	0.536606	-0.104036	-0.331702	0.43075	-0.0245359	-0.421349	-0.0361373	0.0671077	-0.0396813	0.851975	-0.0759097	0.391311	-1.46009	-0.371548	1.54853	0.151008	0.391121
TCGA-AX-A2HD	41.0667	0	69	3	3	-0.19935	-0.0860226	0.168476	0.249367	0.954048	0.0428985	-0.248123	-0.147705	1.90698	1.81536	0.0644293	0.588764	0.52553	1.09456	-1.58606	0.233969	0.425744	0.99091	-0.117625	-0.462627	0.628738	-0.238576	0.61848	0.114039	-0.440631	-0.227957	-0.734888	-0.0369718	-0.188397	0.253118	0.664946	-0.562711	-0.696323	-0.146621	-0.35188	-0.0809671	-0.180389	-0.429656	-0.115866	0.23909	-0.767157	1.42366	-0.420138	0.930242
TCGA-AX-A2HK	3	1	77	3	3	0.273719	0.351478	0.25086	0.351059	0.485651	0.493945	0.559792	0.268234	-0.369532	-0.712193	0.202132	0.953754	0.734335	-0.0850778	1.51262	0.405164	-0.0754667	-0.0500084	0.072613	0.116495	-0.649338	0.171844	0.798589	0.351575	-0.105575	0.241086	0.448822	0.0631895	0.0732566	-0.324327	0.0863916	0.080344	0.343869	0.232069	0.360128	0.432187	0.488453	1.48899	0.262737	-1.00002	-0.408672	2.19319	0.0146544	0.572418
endo2	52.4333	0	78	2	2	0.36884	-0.313376	-0.236106	0.087031	-0.170317	0.474685	0.58351	-0.248297	-0.341844	0.0604132	0.142837	-1.15327	-0.0900474	0.355032	-0.142585	1.45193	1.09412	-0.452516	0.244432	-0.00451638	-0.20664	0.265154	0.353892	0.168557	-0.123786	0.273791	0.122353	-0.232329	-0.00327237	2.19171	0.0524623	0.555759	0.237719	0.194957	0.0691715	0.0728958	0.159487	0.156831	0.419886	-0.908861	0.211823	1.35941	0.0734312	1.50468
endo5	60	0	76	3	1	0.170955	0.432252	-0.286978	-1.23082	-0.61772	-0.459737	0.534522	-0.509886	0.795401	0.759602	0.00623721	-1.20244	-0.70325	0.942037	0.81	1.34456	0.25691	-0.485491	0.247149	-0.0763547	-0.6492	0.402017	-0.413121	0.143756	0.0133796	0.115687	1.07712	0.00318434	-0.0946288	2.64791	-0.197088	0.369173	0.142123	0.713951	0.109723	0.306449	0.642148	0.36165	0.189429	-2.04111	0.0188259	1.27452	0.922927	0.108235
endo6	60	0	66	3	1	0.456626	-0.7245	-0.438342	-0.81814	-0.628311	1.24154	1.36078	-0.769889	2.1446	1.83434	0.707246	-0.249941	0.139006	0.585241	0.173682	1.27446	0.0642218	-0.626044	0.59631	0.154758	-0.414321	0.544954	-0.445574	0.0887735	-0.363212	0.296946	0.19302	-0.583495	0.0317947	1.18421	-1.2148	0.404925	0.802414	0.595859	0.0271924	0.554198	0.998156	0.295106	0.486818	0.44042	-0.0835625	0.334268	0.355177	0.328876
endo7	16.0667	1	73	3	2	0.393637	0.621421	-0.729839	-0.771225	-0.498652	0.520141	0.906537	-0.863001	-0.618774	0.935284	0.214357	-0.729981	-0.336959	1.17657	-1.28295	1.02288	0.761122	0.995988	0.345103	-0.422661	0.967393	0.308346	0.032344	0.268702	-0.13397	0.136163	-0.0985967	-0.193983	-0.0782019	1.74384	-0.393343	0.493644	0.717752	0.934382	0.209112	0.14416	0.251099	0.180952	0.107488	0.674992	0.271228	1.55498	-0.0905856	-0.0321653
endo8	60	0	69	3	1	0.424786	-0.515655	-0.412348	-0.306715	-0.810648	0.493599	0.836007	-1.01115	1.13935	1.55913	0.331148	-1.09529	-0.0192119	0.505561	0.149844	1.5231	0.90909	-0.387807	0.390992	-0.270645	0.42372	0.590004	0.443995	0.327217	0.0594966	0.391254	1.23166	-0.386117	-0.0205267	0.343517	-1.07363	0.962162	0.562946	0.786299	0.162701	0.172637	0.567749	0.274363	0.403431	0.988885	1.70636	0.363923	0.388267	1.65842
endo9	2.03333	0	66	3	2	0.135782	-0.628991	-0.315927	0.146116	-0.964304	0.4155	0.63127	-1.16031	-0.274113	1.24663	0.348417	-2.24329	-0.778697	0.776456	0.409785	1.18502	0.411226	-0.176709	0.328125	0.0422106	-1.40404	0.155505	-0.00920613	0.428175	-0.200375	0.0980224	0.603952	-0.662776	-0.0802037	2.45483	-0.383607	0.647511	0.402243	1.04563	0.223663	-0.00947203	0.311435	0.0890408	0.089603	-0.0590046	0.641566	0.762147	0.129466	0.240141
endo10	16.2333	0	55	3	2	0.487896	-0.915157	0.00293824	1.35375	-0.290152	0.506676	0.331523	-1.13296	1.65814	2.34631	1.12825	-2.1983	0.287292	-0.575783	1.06044	1.00341	1.12867	1.01058	0.65694	0.282612	-0.356162	0.230394	-0.103021	0.777005	-0.324957	0.350569	0.491062	-0.580058	0.0760717	0.288498	0.326007	0.545511	0.612734	1.06854	0.113664	0.641247	-0.270404	0.078233	0.657449	-0.82582	0.67548	-1.96995	0.292393	0.793124
endo11	55.2667	0	57	2	1	0.411001	-0.773103	0.101833	0.336969	-0.361554	0.251199	0.0809575	-0.814628	1.2624	2.15126	0.812224	-1.0899	-0.0290851	-0.0315568	1.32837	1.35524	0.719398	1.07331	0.525394	-0.163368	0.552606	0.194184	0.222563	0.70455	0.216882	0.407876	-0.00703413	-0.495925	0.269305	0.361961	1.03372	0.580013	0.285127	1.1536	0.243801	0.386483	0.289538	0.264637	0.665434	-0.845329	0.369811	-0.483995	0.347625	0.572627
endo12	56.6	0	55	2	1	0.634189	-0.737292	0.0819941	0.845724	-0.680891	-0.172293	-0.854052	-1.0964	-0.0581873	1.03683	0.982144	-1.11356	0.259018	0.331475	0.75286	1.84478	1.52252	0.717476	1.10481	0.410339	-1.0846	0.170685	0.343836	-0.039273	0.623319	0.609992	1.10582	-0.855129	0.142421	1.14939	1.35236	1.22953	0.635085	0.846711	1.52513	0.784257	-0.100955	0.509688	0.833805	-0.439623	0.418516	-0.838699	0.329583	0.79423
endo14	60	0	51	2	1	0.210496	-0.258783	-0.289877	-0.177547	0.62773	-0.331407	-0.518898	-0.907017	-0.866671	0.307799	0.504363	0.273855	0.572533	-0.349587	1.60822	0.862533	0.315924	-0.147748	0.229664	-0.0704794	0.477722	0.143129	-0.427306	0.323825	-0.143025	0.272566	0.159676	-0.445565	-0.0470818	2.37707	-0.00506389	0.224968	0.0899283	0.441138	0.016361	0.0175495	0.140252	0.14458	0.34357	-1.16722	-0.191174	-0.154088	0.251854	0.40898
endo17	60	0	56	2	1	0.431616	-0.704198	0.424995	1.52831	-0.62276	0.137211	0.497583	-0.98065	0.263334	1.08324	0.456794	-1.61569	-0.322537	2.5092	-0.385237	1.58219	0.841523	0.260419	0.390992	-0.942175	0.160008	0.377678	-0.0479394	-0.0272239	0.114746	0.312124	-0.290816	-0.59815	-0.00845492	0.903953	1.13753	0.831801	0.556377	0.717538	0.201783	0.257289	0.0432799	0.171324	0.433044	-0.477049	0.332197	1.18064	0.242182	1.07613
endo20	60	0	52	1	1	0.418406	-0.632684	0.0766425	1.62921	-0.647213	-1.93418	-1.95598	0.155153	0.349145	1.12876	0.507114	-1.56598	1.62512	-1.00002	-0.0999816	2.14811	-0.118149	1.27189	0.287892	0.394428	-0.531069	0.476642	0.248562	1.01114	0.316534	0.464016	0.593555	-0.442228	0.00777193	0.0116202	3.0706	0.558742	0.429751	1.30612	0.148979	0.185805	-1.10508	0.415302	0.248907	-1.76694	1.79257	-3.07424	0.401328	0.0153406
endo21	52.8333	0	30	1	1	0.14547	-0.457166	-0.242745	-0.726204	-0.337709	0.362318	0.218786	-1.06397	-1.0867	0.224767	0.325353	-1.62291	0.659608	0.037683	2.09468	1.20227	0.231096	0.793291	0.38156	0.390987	0.130853	0.333836	-0.0152489	0.0879744	-0.093554	0.168305	0.707031	-0.516773	-0.0455291	0.544052	1.33078	0.444598	0.306838	0.541986	0.425257	0.0497091	0.340536	0.14569	0.681664	-1.83847	0.216118	0.385262	0.126633	0.44414
endo22	60	0	46	1	1	0.300666	-0.2587	0.122774	-0.911107	-1.23673	-0.64572	-1.29894	-0.105729	0.154552	1.70804	0.644089	0.0699988	-0.494484	-0.61284	-2.7376	1.19404	1.67425	0.930127	0.703241	0.19426	1.84334	0.272518	0.608942	0.626329	1.30191	0.340971	-0.156373	-0.373943	-0.0137308	0.463878	-0.933493	0.315956	0.492873	0.865306	0.0748786	-0.0811722	-0.165086	0.0198565	-0.115203	0.673426	1.08891	-0.691696	0.258762	-0.143765
endo23	60	0	60	2	1	0.746848	-0.180194	-0.105602	-0.294486	-0.311759	-1.27952	-1.03705	-1.09366	-0.583113	1.42967	0.673273	-1.57416	0.209249	-0.333374	-0.195745	2.15136	1.35559	0.406993	2.00366	0.444699	-0.525077	0.714899	0.242591	0.821127	0.568088	0.648654	0.738423	-0.567651	0.136021	1.43193	1.80846	1.39896	1.05472	1.32456	0.699706	0.678081	-0.650108	0.768316	0.707697	-1.07945	1.10091	-1.25888	0.475287	0.900625
endo24	14.4667	0	62	1	1	0.325018	-0.985105	0.0218776	-0.36777	-0.275064	-0.0948748	0.194324	-0.603986	0.125527	1.45988	0.864804	-1.89031	0.8669	-0.569201	0.381305	0.935041	0.408478	1.04849	0.490928	0.0812553	0.72266	0.124307	0.112433	0.615433	-0.320029	0.25603	0.14677	-0.565973	-0.0177474	0.29781	1.23885	0.627058	0.201846	0.968922	-0.0138196	0.145391	-0.183662	0.131511	0.584523	-1.03883	0.693545	-1.30628	-0.0259547	1.25687
endo26	0.166667	0	67	2	1	0.426047	-0.952134	-0.36381	0.0608285	-0.942043	0.527438	0.695639	-1.21469	1.32366	1.25722	0.490304	-0.622496	-0.265512	0.475017	1.32256	0.764853	1.0596	0.123067	0.927549	-0.235684	0.926505	0.320413	0.197958	0.084843	-0.117396	0.389721	-0.269389	-0.648278	0.0304303	0.73904	-0.268957	0.440754	0.248824	0.58797	0.175947	0.291867	0.57937	0.20994	0.822385	-0.797018	0.296574	0.614743	0.37483	2.36969
endo29	44	0	45	2	1	0.273203	-0.840311	0.0810402	-0.659428	-0.58015	-0.00615849	-0.28969	-0.681649	0.44227	-0.294693	-0.0847952	-1.40551	-0.335247	0.755548	-0.186297	1.11138	0.324355	-0.00638082	0.695176	-0.230519	0.687377	0.52502	-0.213611	-0.23959	-0.126151	0.0107535	0.409706	-0.303589	-0.150198	3.22662	2.88639	0.654796	0.0679892	0.584112	-0.0124316	0.509664	0.636795	-0.184052	0.117648	-0.983346	1.005	0.343727	0.442056	0.0890347
endo38	37.6667	0	57	1	2	0.579505	-0.539927	-0.145962	-0.426493	-1.30723	-0.140079	-0.259652	-1.1641	0.901472	1.71799	0.889218	-0.275818	-0.00242274	-0.289222	1.27508	1.26851	1.81918	1.32068	2.83715	0.140567	-1.58838	0.620237	0.348664	0.861345	0.208731	0.533209	0.37865	-0.462491	0.0825159	0.954116	-1.39625	1.0514	0.907019	1.09894	0.373994	0.288348	0.263451	0.522705	0.608297	0.186966	0.134118	-1.1886	0.508923	0.539381
endo40	60	0	48	2	2	0.509608	-0.955405	-0.112716	0.379059	-0.985953	-0.431058	-0.873683	-1.16122	-0.0783957	1.15387	0.775016	-0.466217	-0.454067	-0.147946	0.240594	1.48217	0.643742	0.57841	0.89207	0.347749	0.0516829	0.185152	0.141665	0.39698	0.33739	0.607008	0.608034	-0.783355	0.266237	1.43935	0.966519	0.797744	0.640918	0.994563	0.802579	0.285152	0.113738	0.338509	0.473016	-0.226845	0.836208	-0.756325	0.425972	1.37736
endo41	17.6333	1	55	1	1	0.676554	-0.780905	-0.310181	-0.192445	-0.928901	0.488695	0.417064	-1.16306	0.570234	1.9767	0.68285	-1.28891	0.772738	1.53176	1.3976	1.28283	0.989168	0.437233	0.62259	-0.0996369	0.361139	0.240805	0.29573	0.621047	-0.00670243	0.551478	0.347857	-0.597737	0.149195	1.3633	0.195508	0.700976	0.825555	1.02025	0.773922	0.291362	0.155223	0.314852	0.686594	-0.887402	0.441522	0.18869	0.00591294	1.70084
endo42	40.6333	0	90	2	2	0.42874	-1.05754	0.188668	1.05841	-0.135405	0.174803	0.0475329	-1.09199	2.06849	2.41874	0.824833	-1.02188	-0.322354	-0.0756388	1.67049	1.0126	0.887295	-0.186211	0.442323	-0.0476932	0.92155	0.307596	-0.25891	0.404756	-0.291196	0.26015	-0.161443	-0.514981	0.343489	0.541066	-0.629964	0.226998	0.0681389	0.821399	0.136531	0.475148	0.532755	0.0671614	0.523148	-0.990316	0.0457807	-0.77708	0.228798	1.30773
endo43	60	0	62	2	1	0.832726	-0.905754	-0.268315	0.259308	-0.508714	0.164077	-0.35978	-1.40124	-0.654304	0.708143	0.952838	-2.44076	0.0638798	0.506757	-0.712467	1.39652	1.59065	0.809284	0.931862	0.0243259	-1.34654	0.26868	0.0802184	0.363364	0.444172	0.613932	0.723097	-0.945614	0.12198	1.45338	2.68823	1.4125	0.793661	1.03173	1.02245	0.571772	0.207536	0.585285	0.221164	-0.424491	0.852866	0.239075	0.162961	1.91647
endo51	0.366667	0	28	2	2	0.112019	-0.0753375	-0.269231	-0.271197	0.659128	-0.174532	-0.280981	-0.1208	-0.56142	-0.251557	0.483691	0.884365	0.663939	-0.376916	1.62145	0.508754	0.719211	0.805752	0.128213	0.042359	0.281504	0.0124787	0.226128	0.377661	0.18549	0.114409	0.12817	-0.280567	-0.166735	2.00217	0.140096	0.211675	0.173187	0.0849375	-0.0266362	-0.0261116	-0.00594429	0.0991173	0.312629	0.24193	-0.413902	-0.218466	-0.130045	-0.230979
endo58	60	0	46	2	1	0.399702	-1.05054	-0.12297	-0.204524	-1.33815	-0.332569	-0.280702	-0.749446	0.776812	1.12546	0.81596	0.416551	-0.350362	-0.290046	0.673707	1.21874	1.06516	1.44351	0.980574	0.0961918	-0.356504	0.466029	0.261366	0.284157	0.971277	0.389291	0.328966	-0.376578	0.13829	3.29435	0.07976	0.659428	0.567515	0.418995	0.210093	0.276883	-0.0285121	0.295936	0.569891	-0.801807	0.233232	-1.76447	0.15757	0.318525
endo61	54.0667	0	68	2	1	0.415388	-0.806988	-0.142045	0.0918041	-0.722927	-1.06927	-1.11061	-0.358931	0.978929	0.788274	0.101432	-0.463379	0.840131	-0.82337	0.651612	1.57325	0.614341	0.790323	0.737223	-0.164756	-0.4713	0.683829	0.00101989	0.176183	1.29465	0.538913	0.997285	-0.384697	0.26295	0.107358	1.64988	0.616312	0.397837	0.135796	0.355473	0.279654	-0.957052	0.57241	-0.0275054	-0.967084	1.40394	-2.70416	0.403841	0.59507
endo64	50.8	0	63	3	1	-0.153619	-1.07713	-0.0419367	0.991435	0.748155	0.0642488	-0.00728563	-0.374889	2.20228	2.07813	-0.383	-0.917737	-1.15238	-0.0142267	-2.37145	-0.0684111	-0.00394047	-1.02899	-0.21099	-0.75276	1.18171	-0.154521	-0.111118	0.157337	-0.577882	-0.1442	-0.118089	-0.0423385	-0.042701	-0.309094	-1.24468	-0.259494	-0.291876	0.0434494	-0.198881	-0.571596	-0.567876	-0.428365	-0.0914528	0.878625	-0.394602	0.0849435	0.278861	0.249074
endo65	34.9333	0	39	2	1	-0.138852	0.0191378	-0.401026	0.4036	0.391961	0.231319	0.00727936	-0.332099	1.45855	1.72135	0.13383	0.198339	0.858883	-0.064634	1.25631	0.220306	0.530997	-0.182852	-0.0818949	-0.229009	0.990628	-0.178654	-0.420156	0.504365	-0.565998	-0.133298	0.446482	-0.0360438	0.353659	-0.185597	-0.50779	-0.078213	-0.476059	0.192615	-0.0740235	0.365605	0.366884	0.460666	0.0230619	-0.0846901	-0.540408	0.44143	-0.206658	1.04146
endo66	36.1333	0	66	2	1	-0.177776	-0.267761	-0.0870477	0.738784	-0.0015562	0.393662	0.302046	-0.171612	1.40188	1.55066	0.319189	-0.824883	0.368459	-0.349007	0.893826	-0.423324	0.0211183	0.471785	-0.19859	-0.130123	0.951779	-0.459749	-0.483829	0.108116	0.0572929	-0.25482	-0.653732	-0.0107239	0.454792	-0.807608	-0.599094	-0.0744685	-0.525783	0.101039	-0.109435	-0.228846	-0.523585	-0.40791	0.0434064	0.624241	-0.174445	1.22858	-0.404906	0.554647
endo67	53.2667	0	73	2	2	0.609517	1.15255	-0.292521	-1.24361	-1.38891	-0.54506	-0.597276	-0.656407	0.205488	0.533059	0.124804	-0.185075	0.057974	0.901411	-1.26667	2.12868	0.663491	-0.0622671	0.941104	0.363377	-2.34444	0.899632	0.86613	-0.0416343	0.498611	0.724357	2.03327	-0.545076	0.191394	0.888743	-1.60925	1.32874	1.12995	0.408462	1.30405	0.675754	-0.456205	0.884529	0.548796	1.48352	0.365986	-0.882479	0.403744	1.07404
endo69	51	0	66	2	1	0.113037	0.00664413	0.00055295	-0.0441591	0.629133	0.876025	0.810369	0.0487798	0.090554	0.0734724	0.580709	1.14545	-0.768694	0.505084	-1.13877	0.295176	0.407189	-0.430705	0.301401	0.112763	0.914787	0.151161	0.0212382	0.280101	-0.358022	-0.018403	0.274803	0.00653061	0.0632097	-0.184163	-1.44428	0.203181	0.235075	0.270678	0.0449679	-0.100597	0.00525573	-0.0115532	0.299048	1.77232	-0.66852	0.808383	1.22507	0.484417
endo70	37.7	0	71	2	2	0.350951	-0.301874	-0.0516412	-0.587672	-0.142462	0.65839	0.367492	-0.267478	2.16751	1.72527	0.155413	-0.203661	-0.0987023	0.67514	0.572594	0.494047	0.29571	-1.18091	0.83865	0.199754	0.466279	0.74717	-0.418804	-0.260234	-0.217866	0.10657	0.667704	-0.229297	0.0666507	0.842386	-0.646686	0.374983	-0.060655	-0.0088371	0.642028	0.469697	0.851659	0.468196	0.516622	0.195755	-0.0390955	-0.916858	0.192296	0.973439
endo71	49.2	0	60	2	1	0.577287	0.357682	0.344045	0.785453	-0.659039	1.16441	0.189502	-0.936653	1.64797	1.94928	1.34985	0.717654	0.0536997	0.783074	0.151486	1.03597	1.8672	-0.352887	0.69483	0.523614	-0.915773	0.385163	-0.154972	-0.099574	0.281211	0.608817	0.182261	-0.900188	0.265804	0.647222	-0.173493	0.962386	0.656303	0.153065	1.19485	0.492036	-0.193508	0.560731	0.64023	0.981276	0.00845475	0.177236	0.236447	0.427727
endo73	19.7333	0	48	2	2	0.148287	-0.618544	-0.149606	0.605014	0.227863	0.241323	0.0600068	-0.539517	2.67025	2.17904	0.893235	0.0928121	0.188233	-0.208674	1.68576	0.535029	0.46214	0.508305	0.0141215	-0.127667	-0.196822	0.0699138	0.0880254	0.365236	0.0326211	0.177103	-0.00548735	-0.0644039	0.184695	-0.143231	-0.429849	0.335001	-0.00445957	0.0542241	-0.0672855	0.159065	0.488059	0.237199	0.507719	-0.376991	-0.168767	-0.543796	0.032069	1.22709
endo74	44.3333	0	75	2	1	0.00573071	-0.253126	-0.0328682	0.939376	0.775683	-0.268496	-0.369155	-0.0160638	1.484	0.983854	0.452603	0.336421	1.09699	-0.575783	0.815033	-0.0453559	0.439998	0.575281	-0.0898169	-0.220657	1.3307	-0.189715	-0.256508	0.537508	0.112223	-0.00978155	-0.0543143	-0.0582458	-0.0245948	-0.409998	0.52184	0.283584	-0.249092	0.298322	-0.19045	-0.152296	0.297429	-0.176922	0.215381	0.776184	-0.0497429	0.446825	0.375105	-0.161232
endo76	45.8667	0	50	2	1	0.229088	-0.0400853	-0.282717	-0.205603	-0.0582879	0.0538627	-0.0897949	-0.665768	0.95893	0.26644	0.812564	1.10623	0.241027	-0.670445	1.60914	0.79075	1.20488	0.938213	0.0657204	-0.0488358	1.32782	0.0669935	0.293158	0.334398	-0.0922213	0.166156	-0.0467316	0.00885656	-0.0582366	-0.00452691	-0.731537	0.221547	0.302693	0.0815805	-0.08934	0.245628	0.665788	-0.120526	0.586512	-1.11424	-0.254024	-0.722956	-0.0751682	0.588997
endo77	47.4333	0	69	3	1	0.896857	0.312162	-0.320286	-0.258325	-1.44304	-0.982086	-1.6098	-0.831551	-0.175893	0.893971	-0.100522	-2.05774	0.152789	-0.0737917	-1.56739	1.72743	0.610263	-0.213582	0.940449	-0.355085	-1.40348	0.831658	-0.190539	0.98778	0.387332	0.818866	1.32614	-0.465606	0.18859	0.685802	-0.99291	1.4323	1.35994	0.743879	1.46218	0.6895	-0.376362	0.643282	0.288173	-0.0605077	0.830893	-0.488627	0.690413	0.844245
endo80	46.7667	0	53	2	1	0.181302	-1.26561	0.41601	-0.757955	-0.209784	-0.417104	-0.490721	-0.902398	0.615446	0.817581	0.736855	0.394652	-0.0451231	-0.0185352	1.93625	0.704039	0.624339	0.416059	0.440968	0.143035	-0.530132	0.277307	0.584286	0.0747486	0.332167	0.124139	-0.44761	0.0348395	-0.10579	2.52463	-0.289351	0.374529	0.396707	0.476816	-0.0651844	-0.0112096	-0.109617	0.0794999	0.355359	-1.28371	-0.226418	-1.68299	0.022599	-0.103029
endo82	42.4	0	64	2	1	0.0804387	-1.07959	0.417915	-0.564486	0.170613	0.531803	0.257818	-0.365242	0.445862	-0.24505	0.420806	0.591354	0.0306321	0.0231141	0.721674	-0.0320006	0.0735572	-0.290802	0.586105	-0.0927321	1.19285	0.209564	-0.685627	-0.139742	-0.32407	-0.0956578	0.0778561	-0.0948241	-0.157539	-0.156658	1.08071	0.194233	-0.342701	0.0181086	-0.148576	0.3954	0.693823	0.0802487	-0.105132	-0.38782	-0.00967189	-0.622928	0.108447	0.228614
endo83	47.4	0	70	3	1	0.0131089	-0.624621	-0.268704	0.0793727	0.147984	-0.436441	-0.486564	0.189268	0.563166	0.607386	0.405579	0.3108	0.559124	-0.737745	1.06218	0.263002	0.0458964	0.516637	-0.107185	0.173534	0.414257	-0.0777397	-0.37434	0.369067	0.0317622	0.00881013	-0.255175	-0.21826	-0.0181109	-0.298796	2.0468	0.413747	-0.16257	0.692362	-0.228283	-0.0178827	-0.634907	-0.02354	-0.0249811	-1.30858	0.652103	-1.7889	-0.305702	-0.237247
endo84	37.2333	0	41	2	1	0.157469	-0.734947	0.58626	0.98325	0.413905	-0.277754	-0.477582	-0.597734	2.07976	1.89344	0.485824	-0.457133	0.969561	-0.458236	1.24347	0.541073	0.582521	0.237444	0.24306	0.196039	-0.742242	0.0929393	0.259187	0.224907	-0.0450911	0.0357086	0.0575901	-0.10795	0.01027	-0.370065	-0.826616	0.0273411	0.189295	-0.314979	-0.0698731	-0.0833749	-0.101661	-0.105201	0.458473	-0.396592	-0.315649	-0.729303	-0.0599708	-0.315044
endo85	44.3333	0	66	2	1	0.344666	-0.628991	0.0502035	0.354845	-0.48011	-0.405283	-0.543953	-0.889558	2.02468	1.44995	0.519853	0.2402	0.224782	-0.319722	1.11551	0.382043	0.885177	0.956097	0.482337	-0.122873	0.866534	0.100101	0.126898	0.237495	-0.0321998	0.283777	-0.215079	-0.236573	0.00299144	1.38824	-0.983428	0.516323	0.570678	0.24427	0.15506	0.104835	0.42543	0.203278	0.395288	-0.725388	-0.290492	-1.0881	0.268025	0.616205
endo86	37.2333	0	73	2	1	0.126052	-0.239042	-0.301941	-1.05729	0.845744	-0.776852	-0.575139	-0.142504	-0.27748	0.128384	0.352698	0.475846	0.872289	-0.0444509	-0.202066	0.00464129	0.386882	0.465152	0.185526	-0.22139	0.73126	-0.0735029	0.0678882	0.327574	-0.139993	0.101521	-0.0219313	0.00718673	-0.065036	0.992807	0.419512	0.337726	-0.0650527	0.27451	-0.162294	-0.189905	0.403406	-0.0804882	0.110883	1.24732	-0.0810609	-0.123786	-0.124617	0.155647
endo87	34.5667	0	58	3	1	0.05655	0.549229	-0.582108	-0.665721	0.483085	0.0783822	-0.0390018	0.0819106	0.195546	-0.00917519	0.270695	0.753437	1.04212	0.451923	-0.630647	0.168572	0.133871	-0.297137	-0.0201535	-0.197759	1.02959	-0.0876393	0.581745	0.158545	0.00308557	0.00337031	1.4485	0.216993	0.0220395	-0.00116149	-1.27408	-0.0294908	-0.169247	0.45421	-0.141106	0.33575	0.784671	0.74546	0.0506421	0.80344	-0.341363	1.91946	-0.162245	0.0626676
endo88	43.6	0	62	1	1	0.00860306	-0.570185	-0.144518	0.364334	0.888268	-0.587353	-0.831037	-0.132083	0.0316393	-0.494246	0.456382	0.0859661	1.26329	-0.630387	0.733056	0.209148	0.283872	0.199694	0.306454	-0.0656179	0.63497	0.0232965	-0.643424	0.465805	-0.0680779	0.00174597	0.503608	-0.0650347	-0.0144647	0.144596	0.266721	0.0923308	-0.245577	-0.295349	-0.21074	-0.0874792	0.0399006	0.0189706	0.00964409	-0.574663	0.195054	-1.2497	0.400583	0.539229
endo90	15.0333	0	33	2	1	0.00621834	-0.974327	-0.151317	1.27899	0.291654	-0.321078	-0.780739	-0.341811	1.70011	1.82686	0.612237	-0.336605	0.213347	-0.244833	0.466197	0.118245	0.48862	0.417047	0.0438259	-0.0392913	1.42125	-0.110936	-0.190794	0.337239	-0.215229	-0.0507362	-0.578999	-0.0927952	0.118753	-0.238864	-0.105831	0.0612237	-0.34363	-0.0185482	-0.255974	-0.00832527	0.089709	-0.300258	0.208844	-0.364484	0.153859	-1.84462	-0.235035	0.891472
endo91	45.9667	0	39.2772	2	1	0.00268738	-1.20682	0.0710309	-0.214074	1.18485	-0.903899	-1.53416	0.0972228	1.69251	1.71433	-0.00521386	-0.685317	-0.368548	0.0127765	-1.36795	-0.352053	-0.368862	-0.173158	0.500795	-0.267485	1.30087	0.019423	-0.636637	0.0148392	-0.863152	-0.290298	-0.068784	-0.00378936	-0.189271	1.78129	-0.345664	-0.221538	-0.67257	-0.533342	-0.266359	0.570246	-0.0971662	-0.512968	-0.0987071	0.363582	-0.405252	-0.525177	0.301314	1.08106
endo92	50	0	56.6598	2	2	0.0131089	-0.455648	-0.323192	0.204334	0.130617	0.0102396	-0.0882843	-0.31115	-0.135303	1.32577	0.196546	-0.799575	-0.491248	-0.0678587	0.69523	0.0323365	0.225184	0.335647	0.0254915	-0.0909771	-0.0613776	-0.0362475	-0.128616	0.308764	-0.076305	-0.0792969	-0.560753	0.0101332	-0.0302406	0.13553	-1.12227	0.0989265	-0.0296185	0.601511	0.0404786	-0.266426	0.129553	0.0584822	0.186031	0.993346	-0.277169	1.33701	-0.217123	0.741344
endo93	41.7667	0	72.6954	2	1	0.187657	-0.455754	-0.191638	-0.0168275	0.104982	0.0629941	-0.0447767	0.0960335	1.15647	1.48374	0.690068	-0.322818	1.13578	-0.358496	1.35139	0.405581	0.406771	0.443208	0.240864	0.183245	0.635252	0.00895291	-0.0322812	0.444277	-0.00223544	0.165525	-0.106937	-0.207498	0.262012	0.000472796	0.291019	0.345448	0.111543	0.796745	0.284629	0.0864986	0.335797	0.216299	0.392445	1.28732	-0.0991502	-1.05378	-0.221488	0.516448
endo94	44.4	0	24.3094	2	1	0.0564647	-0.546277	-0.457302	-0.272817	-0.939605	-1.53504	-1.49841	0.538898	0.759692	0.883195	0.777549	-0.0810831	0.733278	-1.29384	-0.247033	0.587931	-0.356232	1.02455	-0.164095	0.119939	-0.425805	0.111199	0.000214723	0.852121	0.470847	0.232203	-0.174028	-0.264691	0.0443809	-0.216341	2.33331	0.513419	0.0017548	1.06061	-0.0491099	0.214541	-1.42438	0.0895649	0.0527902	-2.02252	0.563459	-2.96307	-0.0834389	-0.426372
endo99	39.1	0	40.8789	2	2	0.087801	-0.0664066	0.610294	-0.288687	0.230885	-0.0226832	-0.0778275	-0.652683	0.990391	0.635332	0.721517	0.958121	0.324294	0.514974	1.17931	0.617423	0.437107	0.614942	0.390992	-0.0682983	0.161029	0.281035	0.562986	0.151991	0.737417	0.0552788	0.11039	0.144421	-0.0334463	0.377964	-1.6358	0.0920328	0.0494283	0.378284	-0.00931285	-0.139965	0.500106	0.0311773	0.234395	0.494862	-0.31928	0.298415	0.203291	-0.182335
endo103	28.5	0	59.2444	2	1	0.0131089	-0.148019	-0.252947	-0.470817	0.558914	0.383703	0.31095	0.0495654	1.37732	1.23289	0.695784	0.893964	0.909402	-0.331096	-0.624411	-0.0314406	0.233571	0.729905	-0.0254895	-0.423258	0.863256	0.0118687	0.0534243	0.229936	-0.0191489	-0.0835403	-0.694941	0.0758081	0.100187	-0.168897	0.48384	0.165672	-0.242564	1.06144	0.0252439	0.244409	0.561526	0.92878	0.427885	0.838466	0.0724702	0.181767	-0.254876	0.809473
endo104	60	0	60.9911	2	1	0.539277	-0.201774	-0.552252	-0.2456	-1.81738	-1.43717	-1.62072	-0.174368	1.16654	0.902761	0.0964838	-0.221777	-0.3636	0.413393	0.551613	1.57491	0.578707	-0.347739	0.504867	-0.672787	-2.1348	0.520947	0.181794	0.208973	0.223729	0.313751	0.236419	-0.535745	0.110126	1.23771	-0.946914	1.21594	0.810243	0.528566	0.458461	0.257228	-0.869225	0.575014	0.021387	0.126357	0.635639	-1.88916	0.204893	0.186149
endo107	17.6	0	53.4127	1	1	0.156862	-0.88007	-0.359784	0.453854	0.206316	0.273186	-0.00439363	-0.740675	1.0627	1.07346	0.775684	-0.509226	0.491399	-0.520485	1.33748	0.587931	0.512247	0.62023	0.0705107	0.0554331	0.916192	0.149939	-0.181411	0.359002	-0.23642	-0.00974008	-0.104143	-0.127049	0.0413603	2.44766	-0.39397	0.320145	-0.376841	0.0900918	-0.130186	0.415148	0.159732	0.448082	0.551344	-0.829367	-0.1122	-0.583601	-0.0376568	0.931761
endo110	35.4	0	87.4305	2	1	0.310619	0.29185	0.172554	0.912876	0.453435	-0.682	-0.363139	-0.278643	1.89089	2.17184	0.549601	-0.842461	0.680627	0.116505	0.203964	1.30106	0.548158	0.0161144	0.112651	-0.0269448	0.780105	0.314296	0.118484	0.788511	-0.0237332	0.417888	0.0963997	-0.443495	0.128248	0.448551	-1.84619	0.688814	0.39744	0.694027	0.51231	0.287375	0.0845925	0.572717	0.282317	-0.306742	-0.11123	-0.694413	0.128766	0.29179
endo111	35.2667	0	59.4743	2	1	0.0685588	-0.126108	-0.27417	-0.0129814	0.425719	0.793545	0.754784	-0.473893	1.26124	1.62952	0.724896	0.456187	1.21803	-0.134037	1.06162	0.283173	0.307856	-0.357878	-0.0665224	-0.339663	1.00045	0.000836452	-0.0823834	0.2524	-0.530933	-0.00714308	0.367115	0.0941008	0.316885	-0.203438	-0.718331	-0.15443	-0.312066	0.688375	0.00331627	0.272335	0.71485	0.565104	0.373773	0.938389	-0.240045	0.87581	-0.278801	1.70465
endo112	32.6667	0	53.5003	2	1	0.0679222	-0.527412	-0.453847	-0.142235	-0.848311	-1.41906	-1.39638	0.446403	0.619506	1.30535	0.602208	-0.261005	0.866384	-1.29459	-0.558826	0.404679	-0.565291	0.986702	-0.268344	-0.424891	-0.415796	0.083313	-0.558793	1.04231	0.522714	0.039015	-0.570394	-0.31791	0.020775	-0.027792	3.30701	0.261504	0.0422703	1.09191	-0.0970963	0.184402	-1.06556	0.194356	-0.186827	-1.86567	0.490376	-2.77365	-0.204584	-0.412013
endo115	35.2	0	67.1102	2	2	0.117983	-0.774877	-0.488093	-0.177063	-0.93793	-1.25032	-1.48958	-0.0131808	1.173	1.05307	0.300442	-0.367643	0.768471	-1.00881	-0.977429	0.705468	-0.241648	-0.0476818	-0.109027	-0.474588	-0.921894	0.330734	-0.43975	0.491034	-0.0759842	0.164366	0.49162	-0.302405	0.0927211	0.112204	2.82165	0.403686	0.0977939	0.809777	0.166132	0.109322	-1.00086	0.260467	-0.183043	-1.46187	2.08328	-1.29625	-0.0166651	0.133174
endo116	35.5333	0	78.6776	2	1	0.0861473	-0.817748	-0.0786297	0.887286	0.584582	-0.14071	-0.439419	-0.0822819	1.91381	2.32258	0.845379	-0.324925	0.0513346	-0.178136	0.163187	0.434958	-0.144868	0.224061	0.200322	0.0722579	1.23793	0.0254747	-0.241491	0.41274	0.0594021	-0.173734	-0.0335901	-0.0515954	-0.102082	-0.356431	1.14194	0.215843	-0.191876	0.612109	-0.0160156	0.0535509	-0.572607	-0.117009	-0.0356489	0.458356	0.78614	-1.92693	0.222615	0.00363254
endo117	35.2333	0	62.3847	2	1	0.441599	-1.00261	-0.113852	0.542861	-0.260814	0.482494	-0.139368	-0.935314	1.44825	2.69373	0.635521	-0.801503	0.416176	0.29901	0.625499	0.581658	1.54599	0.364254	0.676388	-0.656834	0.616231	0.114038	0.344117	0.147077	0.0798078	0.301014	0.125807	-0.685015	0.116558	0.38633	-0.900838	0.462181	0.344339	0.556301	0.666388	0.166224	0.388489	0.288119	0.502512	0.138487	0.111928	-0.510896	-0.0179734	1.82988
endo118	35.2	0	57.8973	1	1	-0.0229384	-0.438721	-0.222268	0.224125	0.579403	-0.375294	-0.914125	-0.474849	1.66083	1.85141	0.232293	-0.0807667	-0.341094	-0.598672	-1.15134	0.587931	0.355745	0.245671	0.0981193	-0.220388	1.06477	-0.0486042	0.131964	0.391154	-0.553409	-0.0350411	-0.462905	-0.189145	-0.0524731	-0.164743	-1.588	0.0949872	-0.27992	0.385159	-0.106879	0.0437891	0.354288	-0.0301488	0.363467	0.255945	-0.358655	0.0460067	0.0402397	1.15689
endo120	32.1667	0	58.694	2	1	0.0715234	-0.628991	-0.381979	0.0312224	0.0142717	-0.764173	-1.31953	0.346799	0.23233	0.613855	0.542659	-0.101303	1.39396	-0.957841	0.41494	0.707243	-0.421402	1.24385	-0.0425815	0.0710802	0.0715136	0.0128234	-0.120549	1.21559	0.972993	-0.0320859	0.349515	-0.175728	0.210259	-0.402369	3.11652	0.530608	-0.222483	0.690759	-0.0466968	0.102577	-1.44612	0.00174835	-0.00209204	-0.992161	0.609662	-2.39738	-0.159453	-0.527868
endo121	30.6667	0	72.4025	2	1	0.0422496	-0.629071	0.00262118	-0.334275	-0.258659	-0.876163	-1.1048	0.235895	0.397431	1.24023	0.784043	0.143128	1.04746	-1.00045	-0.438918	0.429321	-0.40939	0.917285	-0.213885	-0.114099	-0.520822	-0.0478034	-0.656033	1.00437	0.314623	0.0251479	-0.139568	-0.0987904	0.0236059	-0.148687	4.03913	0.493772	-0.0758919	1.25252	-0.0739749	0.475478	-1.32259	-0.131397	-0.260747	-1.91441	1.26402	-2.32185	-0.16101	-0.781534
endo123	2.5	1	78.7515	2	1	0.290245	-0.0889326	0.14296	0.348691	0.126669	0.502685	0.580309	-0.708542	2.07611	2.98733	0.775776	0.199785	0.541639	0.331156	1.02445	0.72563	1.15121	0.958915	0.163008	-0.312666	-0.381362	0.0620607	0.57379	0.586269	-0.275607	0.257468	-0.227559	-0.130104	0.118224	0.508338	-1.34084	0.16964	-0.0971833	1.05298	0.251543	0.170866	0.833162	0.530128	0.726301	0.670692	0.0523377	0.576628	-0.0191728	1.33131
endo124	25.9333	0	50.6557	2	1	0.154562	-0.44523	0.562596	0.174538	0.331802	0.141897	0.361311	-0.673092	1.07597	1.56822	1.16027	0.146521	-0.250125	1.1847	1.16637	0.372635	0.527681	0.338336	0.318032	-0.168446	1.82776	0.103657	-0.0416808	0.4443	-0.375952	0.12399	-0.308045	-0.113052	-0.14163	1.07862	-0.783174	0.24641	0.285232	0.481735	0.01184	0.121783	0.370772	0.00919952	0.494563	0.0207647	-0.296834	-0.755034	0.0724723	-0.124727
endo125	23.3	0	52.1123	2	1	-0.0809717	-0.0922518	0.494902	0.540251	0.782477	0.433376	0.181646	-0.422707	2.16583	2.23672	0.418293	-0.352117	0.410683	1.45381	-0.21419	0.0159888	-0.433395	0.183706	-0.08337	-0.29441	-0.204599	-0.0568102	0.169622	0.425136	0.0963346	-0.161029	-0.395619	-0.0686034	0.179726	0.458327	-1.55455	-0.103329	-0.581242	0.0194408	-0.0866797	0.0899654	0.348629	-0.1052	-0.186344	0.467496	-0.492316	0.636879	0.634829	-0.484916
endo126	26.9	0	80.731	3	2	-0.0258698	0.174396	-0.144053	1.14676	-0.279222	-0.475007	-0.83126	0.242152	-0.376884	0.17973	0.144476	-0.537881	0.729177	0.627076	0.0867395	0.273041	0.507357	0.71978	0.111314	0.112912	0.333149	0.0571065	0.334367	0.437894	-0.195101	0.0208772	0.208671	-0.188988	-0.0559087	-0.260438	1.06353	0.27933	-0.449878	0.448941	-0.116052	0.108011	-0.11293	-0.0404858	-0.211464	0.48608	0.534194	-0.259771	-0.0626853	0.0301849
endo128	12.1333	0	82.3956	3	1	0.348225	0.0307404	-0.438185	-0.405671	-0.832182	-1.31331	-1.93121	0.244463	0.603603	1.50117	0.299525	-0.136642	0.181463	-0.405266	-0.999148	1.89634	0.483088	-0.601927	0.367502	-0.0281994	-0.691394	1.08849	-0.0988684	0.723618	0.259462	0.261493	0.391231	-0.350185	0.0894386	0.581324	0.0429768	0.616823	0.274485	1.08703	0.483385	0.329481	-0.949246	0.516665	0.119827	-0.905952	0.7774	-1.77613	0.662908	0.269409
endo129	10.5333	0	41.1691	2	2	-0.114104	-0.596128	-0.204096	0.163465	0.527909	-0.588763	-0.918785	0.325901	1.54716	1.28528	0.402426	-0.0331126	0.636899	-0.781664	1.0476	0.299193	-0.0288502	0.684628	-0.26171	3.15532e-05	0.815465	-0.127464	-0.525793	0.600965	-0.122656	-0.236351	-0.568848	-0.027371	0.00090403	-0.639044	2.20521	0.0754715	-0.329382	0.65935	-0.138852	-0.0599451	-0.816371	-0.106759	0.0785442	-1.34701	0.667897	-1.6775	-0.275667	-0.50529
endo131	31.4667	0	59.7755	2	1	0.110364	0.0368118	-0.0348603	-1.14051	0.326308	-0.730328	-0.187715	0.0351216	-0.411462	-0.260809	0.464212	0.0176129	-0.137459	0.278472	0.876426	0.758886	0.174141	0.872586	0.190575	-0.0842419	0.864097	0.179016	0.584869	-0.161214	-0.0772836	0.0025182	-0.378559	0.0382321	-0.147977	0.71227	0.468342	0.412959	0.0826	0.252666	-0.0689514	0.0873175	-0.293123	-0.0120849	0.403758	1.00134	0.0228824	0.565235	-0.172701	1.09517
endo138	29.9333	0	39.5866	2	1	0.872165	-0.734049	-0.460412	0.40688	-1.01778	0.395552	-0.625889	-0.840623	-0.277186	2.48108	1.40666	-1.25549	0.408141	0.166726	-1.02593	0.756758	1.75903	-0.380397	0.674132	-0.214685	-1.5759	0.38692	-0.416535	0.765988	0.463833	0.64867	0.881596	-0.55621	-0.0491403	3.17766	0.331749	0.995127	1.00621	1.1765	1.39871	0.651704	0.170311	0.5118	0.412546	0.550273	0.772097	-1.60963	0.554774	0.928233
endo139	25.2667	0	28.386	1	1	0.208647	-1.22733	0.0370234	1.06319	0.520986	-0.659027	-0.89269	-0.40732	1.60827	1.8397	1.06921	-1.38646	0.0780872	0.0828178	0.391227	0.653286	0.0753052	0.620193	0.292884	0.105046	-0.342386	0.254307	0.0286326	0.0856799	-0.308646	0.0542905	0.215647	-0.172836	-0.189186	-0.166294	-0.34043	0.30132	-0.164393	0.468992	0.00376697	0.135281	-0.194771	-0.013093	0.0630267	-0.888339	0.45099	-2.02356	-0.0626107	0.0313006
endo142	30.2	0	56.1314	2	1	0.119196	-0.718465	0.35384	0.680722	0.242867	-0.179951	-0.238299	-0.333071	0.601094	1.03311	0.79047	-0.654318	0.455173	0.44057	0.431059	0.67485	-0.132724	0.630374	0.0122871	-0.150374	0.337757	0.132825	-0.211307	0.43016	-0.142282	-0.0501577	0.0528508	-0.318609	-0.0857345	0.00834858	1.46973	0.221622	-0.132945	0.870542	-0.117288	-0.0324219	-0.281604	-0.289508	0.393424	-0.514887	0.755527	-1.44194	-0.186184	0.901286
endo145	16.7333	0	56.4107	2	1	0.713931	-0.828775	-0.0455315	0.759923	-0.954953	0.684184	-0.221369	-1.04639	-0.0336958	2.39432	1.42745	-0.674084	-0.0940965	0.542274	-0.691004	1.10529	2.00655	-0.155059	0.763596	-0.161226	-1.8523	0.0269452	-0.605246	0.9142	0.559251	0.350247	0.146281	-0.701449	0.318272	1.4409	-0.349762	1.17756	0.785681	1.36932	1.22921	0.670341	0.101629	0.921039	0.14519	0.711747	-0.103359	-0.989947	0.204298	1.07764
endo146	6.2	1	76.7529	2	1	0.0572166	-0.373934	-0.137656	-0.212261	0.069969	0.216111	0.409632	-0.429917	1.08493	1.04584	0.375418	0.281686	0.474919	0.140865	1.67614	-0.0545934	0.467376	0.784491	0.120228	-0.3817	0.0401302	-0.0140112	0.753628	0.320316	0.490336	-0.0718432	-0.496277	-0.0672736	-0.12476	1.858	0.29709	0.233723	0.0352598	0.329035	-0.0755911	-0.0742157	0.0237371	-0.244651	0.302497	-1.24966	0.0155025	-0.0451574	-0.222379	0.588697
endo147	7.9	1	62.6585	2	1	0.123562	-0.0649868	0.00152178	-0.0751594	0.93326	-0.249706	-0.323339	-0.405618	1.65819	1.78731	0.117282	-0.195323	-0.0887547	0.13889	0.359446	0.201335	0.294982	0.987569	0.127451	-0.458921	0.272331	-0.0597913	0.54226	0.337175	0.412839	-0.0403306	-0.660559	-0.035542	-0.0922464	0.354829	-1.18823	0.0398751	0.476015	0.406943	-0.0304437	-0.00101315	0.646598	0.468258	0.365055	0.856614	0.366443	0.154265	-0.105377	1.56797
endo148	26.0667	1	72.3176	2	1	0.210568	-0.68466	0.306935	0.319768	-0.471867	-0.504619	-0.457758	-0.157032	0.0780855	1.22733	0.603753	-1.70064	-0.470134	-1.14545	-0.708207	0.495255	0.22244	0.447552	0.320753	-0.479423	0.44639	0.0276462	-0.0438359	0.473014	-0.222921	0.0743063	0.0643475	-0.380128	-0.138247	0.0354088	2.04805	0.297432	0.115619	0.851414	-0.0216145	0.165854	-0.479632	-0.0392798	-0.157139	0.409517	0.898335	-1.47817	0.0177325	1.23537
endo150	26.1333	0	52.1068	3	1	0.147295	-0.780657	-0.362832	0.530478	-0.463636	-0.579544	-1.01175	-0.249903	1.08602	1.03134	-0.201777	-1.57522	0.561314	-0.217111	-0.63642	-0.120327	-0.0843843	0.561032	0.632132	-0.203809	0.505061	0.163631	-0.391469	-0.681333	0.115949	-0.213218	-0.509705	-0.41416	-0.11685	0.285226	2.60031	0.520676	-0.270715	-0.185184	0.12744	0.22527	0.396153	-0.442526	-0.296103	-1.68273	0.334001	0.0347318	-0.137725	-0.487315
endo151	27.8	0	64.7091	2	1	0.33829	-0.295375	-0.318311	0.264021	0.323186	0.433755	0.308315	-0.299028	2.83493	2.65039	0.327697	-0.719544	0.0201926	-0.447005	-0.281257	0.630211	0.927573	-0.592015	0.258085	0.371644	-0.0930782	0.403776	-0.141418	-0.420672	-0.00872497	0.155213	-0.077232	-0.334739	0.290115	0.178459	0.160023	0.405562	0.0254884	-0.0709186	0.710726	0.145874	0.154227	0.119442	0.531974	0.439368	0.770472	0.123136	0.143865	0.42543
endo152	26	0	49.3717	2	1	0.344998	-0.607729	-0.160451	-0.935251	0.654464	-1.45196	-1.01545	-0.074825	-0.129999	-0.437181	0.059633	-1.69132	0.0394141	0.274356	-1.08938	0.884269	0.376841	0.126023	0.404279	0.107853	0.747879	0.19964	0.239059	-0.423691	-0.102811	0.119131	0.108669	-0.0408378	-0.132887	0.260743	1.46104	0.463465	0.15114	-0.0210758	0.0298103	-0.137257	-0.121591	-0.108444	0.304471	-0.977207	0.59428	0.310479	-0.0457166	1.62861
endo153	22.9	0	75.6578	2	2	0.0845606	-0.178182	-0.189595	-0.417403	-0.063384	0.254438	-0.145393	-0.703322	1.62635	1.00205	0.341114	1.05371	0.241027	0.381758	0.733791	0.905132	0.168133	0.23967	0.0216536	0.267081	1.12968	-0.0536829	0.0271871	0.145709	-0.312772	0.046803	0.0333785	-0.0198835	0.134644	-0.333331	-0.993424	0.214216	0.0574111	0.124552	-0.136417	0.15664	0.370369	0.0856662	0.736463	-0.120032	-0.53112	0.185443	-0.209075	0.0441669
endo154	27.0333	0	62.1711	2	1	-0.00652953	0.540539	-0.13635	-0.566411	-0.142721	0.816077	0.781071	-0.0990264	3.07101	2.45575	0.611684	1.13012	-0.99352	0.316462	1.14089	0.422463	-0.0132663	-1.2579	0.125214	-0.00234566	0.513196	0.0635263	-0.18176	-0.177663	-0.617889	-0.0630584	0.443912	0.00144625	0.0994733	-0.406389	-0.811947	-0.0356962	-0.106532	-0.100316	-0.0418195	-0.101386	0.260295	-0.0616814	0.462811	0.980296	0.0860553	0.501744	-0.235035	-0.115675
endo155	21.3333	0	63.5975	2	1	0.00407691	0.177204	0.0968997	-0.0447537	1.13228	0.266871	0.247769	0.309598	-0.707125	-0.888236	0.0154245	0.833903	1.0441	0.339242	0.783182	0.663245	0.459251	0.930183	0.163217	0.241767	1.19481	0.00191272	0.441692	-0.219813	-0.513598	-0.0405816	0.530671	0.153539	0.0867978	-0.418962	-0.755671	0.332169	-0.294398	0.157638	0.04156	0.0432007	0.623429	0.271868	0.512324	-0.627097	0.790677	1.47434	-0.354683	1.80296
endo159	28	0	71.5592	3	1	0.0748128	-0.622919	-0.602185	-0.796604	0.432626	-0.613885	-0.999687	-0.223012	1.32981	0.467203	-0.577264	-0.295994	-0.53352	-0.319562	-0.45755	0.486314	-0.431492	-0.488622	0.97435	-0.283299	-0.128693	0.38507	-0.648763	-0.200652	-0.389639	-0.054691	1.94928	-0.117553	-0.122495	0.458916	0.233225	0.306488	0.00306995	-0.265101	-0.00458939	-0.0981658	-0.0954992	0.18439	-0.0673284	-0.91576	0.645082	-0.413415	0.424934	0.292175
endo163	24.3	0	59.1075	2	1	0.614023	-1.07532	-0.437007	-0.704976	-0.493857	-0.260314	-0.114877	-1.17369	-0.299474	2.45148	1.75031	-0.271759	0.0312856	0.769481	0.538377	0.778817	1.52507	0.0437811	0.713922	0.374317	0.440657	0.132313	0.246935	0.7911	-0.0854119	0.336837	0.243206	-0.590771	0.0954088	0.951324	-0.661823	1.86521	0.447637	1.87092	0.492771	0.389963	-0.0842295	0.216852	0.953377	-0.0860526	0.226785	-2.13116	0.300078	0.753889
endo164	26.4667	0	63.822	3	1	-0.169582	-0.198323	-0.278484	0.334381	-0.10801	0.734312	0.597963	-0.570643	2.11957	2.14987	-0.283904	-0.908149	0.374628	0.867317	-1.00931	1.2749	-1.24555	-1.23684	-0.27058	-0.297106	0.395134	1.33469	-0.319081	-0.166987	0.307509	0.0199893	0.697528	-0.16943	0.333762	1.2134	-0.647243	0.450383	-0.733751	0.520039	0.460552	0.516111	0.459209	0.785312	-0.0780033	-0.958255	0.0442725	0.149156	0.0181998	-0.578233
endo166	19.1333	0	45.6372	2	1	0.0605767	-0.361014	-0.276854	-0.0288312	0.767015	-0.624593	-0.519912	-0.403056	-0.856573	0.281034	0.283932	-1.93737	-0.0852877	-0.59354	0.743338	0.633369	0.474603	0.867337	0.283766	0.0959274	0.0918208	-0.0053513	-0.286153	0.44167	-0.065182	-0.0679921	0.611582	-0.489446	-0.0556949	0.308787	0.754561	-0.0715311	-0.109669	0.425523	-0.049356	-0.140009	0.207275	-0.318583	0.355825	-0.72665	0.336297	0.164682	1.38291	-0.226704
endo167	20.8667	0	76.3915	2	1	0.161719	-0.244311	-0.212179	0.358297	-0.109849	-1.18789	-0.794733	-0.424466	1.88903	1.73905	0.226926	-0.948056	0.385726	-0.314146	0.422689	1.42758	0.146366	0.675906	0.373656	0.0951155	0.422665	0.346912	0.216479	0.457933	0.0779508	0.0696199	0.306743	-0.41542	0.000657256	0.156075	0.416625	0.442711	-0.205894	0.578958	0.0733515	-0.143502	-0.879092	0.100644	0.0470103	-0.900861	0.58939	-1.76744	0.113708	0.65942
endo170	21.6333	0	45.2923	2	1	0.141414	0.254802	0.179984	0.0909818	-0.473257	-0.330986	-0.536478	-0.445001	1.39757	1.3842	0.601317	-0.706757	-0.0538703	-0.446925	-0.146099	0.35879	0.389761	-0.146468	0.153464	-0.366564	-1.24218	0.0449095	-0.102753	-0.0583075	-0.0665894	-0.0303993	-0.447664	-0.185486	-0.00466604	1.54817	-0.0969009	0.0935287	0.666039	0.192842	0.0130507	-0.0939832	0.216319	-0.0201153	0.0117034	0.431964	-0.0320004	0.381453	-0.00028493	-0.102191
endo171	22.8	0	64.9363	2	1	0.463871	0.39198	-0.208032	-0.259949	-0.531362	0.498719	-0.068103	-0.632508	2.24825	2.79304	0.551682	-0.182115	0.479631	1.0065	0.00719188	0.169677	0.789624	-0.278412	0.552902	-0.358386	-0.0949018	-0.0825891	0.600734	0.500363	0.0352093	0.14641	-0.142119	-0.647034	0.251757	0.924268	-0.69049	0.309482	0.18568	1.08347	0.931682	0.168167	0.758514	0.510559	0.462085	1.07876	-0.215696	0.734219	-0.114037	0.816681
endo172	23.5333	0	41.9384	2	1	0.325213	-1.14584	0.472656	0.692929	-0.071546	-0.843337	-0.460174	-0.622451	-0.571729	0.48809	1.09457	-1.54961	-0.433632	-0.93264	-0.529051	0.404846	0.669468	0.237045	0.558625	-0.203434	1.15126	0.0278466	0.336124	0.191363	-0.332742	0.139464	-0.269912	-0.303589	-0.255759	0.639436	0.300953	0.190463	0.501986	0.361952	-0.0538987	-0.0211098	-0.0123604	-0.0590537	-0.0476674	-0.359935	-0.104022	-1.99949	0.181919	-0.0422276
endo181	21.8	0	57	3	1	0.478595	0.0557123	-0.437507	-1.29711	-0.945253	1.10439	0.474657	-1.05242	-0.0927205	2.07216	1.37563	0.690991	-0.467094	-0.31079	-0.305638	0.956641	1.38379	0.0584958	0.537419	-0.260929	-0.358572	-0.00105153	0.357375	0.491555	0.218889	0.271758	0.0772735	-0.86213	0.0312606	2.17594	-0.558243	0.320827	0.547911	1.62765	0.929543	0.321462	0.344734	0.644264	0.816056	1.62453	0.0439513	0.558099	0.274574	1.49258
endo184	19.1333	0	63	2	1	0.179943	-0.196857	0.0491986	0.274119	1.06408	0.665016	0.485693	-0.143378	2.30251	1.75157	0.55961	0.0560594	-0.135834	-0.532135	0.69282	0.557927	0.714982	0.128009	0.261207	0.117872	0.571832	0.198843	0.106469	0.397391	-0.445994	0.112076	-0.386269	-0.179607	-0.0637201	0.603762	-0.82664	0.211939	-0.314322	0.230643	-0.0395622	0.305584	-0.368786	0.356123	0.58595	0.206058	-0.17507	0.519386	0.179489	1.57381
endo186	17.5667	0	51	2	2	0.425912	-1.16302	-0.233781	0.286746	-1.12689	-0.395263	-1.12948	-1.18136	0.0102611	1.60666	1.49071	-1.60024	-0.415465	0.942953	-1.35945	0.985701	1.42521	0.211386	0.604191	-0.177103	-0.596824	-0.03015	0.310294	0.717932	0.0308551	0.408461	0.149582	-0.757778	0.00106656	1.53913	-0.152084	1.06334	0.747155	1.03021	0.732279	0.361387	-0.168133	0.216407	0.533105	-0.148066	0.0122648	-0.311527	0.609256	0.766135
endo191	0.333333	0	50	2	1	0.377738	-0.301605	-0.268007	-0.805522	0.000805724	0.160021	-0.224688	-0.710246	0.953699	0.300236	0.439948	0.897575	-0.43465	0.296076	1.09512	0.534474	0.585912	0.59957	0.396558	0.220368	-0.308147	0.178085	0.262338	0.123489	0.237118	-0.064579	-0.229995	-0.24273	-0.157801	2.2636	-0.707635	0.308897	0.272905	0.189653	-0.00494494	0.318395	0.398589	0.942766	0.640637	0.512113	-0.0703291	0.724613	0.0600616	1.12915
endo194	7.96667	0	79	2	1	0.323171	-0.800216	-0.307749	1.14087	0.169185	-0.121515	-0.000183839	-0.733909	1.41991	1.5473	0.327605	-0.695779	0.852838	-0.432051	-0.55942	0.587931	0.868907	-0.489258	0.873739	-0.0439822	1.11523	0.429216	-0.079485	0.300103	-0.121199	0.14064	-0.0070086	-0.399851	-0.0745228	-0.127732	0.0287457	0.175467	0.0280513	0.326242	0.248023	0.205686	-0.459925	0.139544	0.38756	-0.347458	0.143969	-1.89574	0.113488	1.35663
endo196	16	0	55	2	1	0.156291	-0.189537	-0.0403059	-0.840559	0.515552	-0.588529	-0.452461	-0.331108	-0.393954	1.27852	0.78712	-0.48338	-0.650001	1.74156	-0.957594	0.494998	0.572547	0.819062	0.543584	0.0171474	0.463082	0.191261	0.287095	0.349426	-0.277728	0.133909	-0.0051249	-0.164972	-0.131313	1.58182	-0.348239	0.258076	-0.139107	0.858057	-0.016859	-0.0757361	-0.0285121	0.290789	0.978567	-0.893874	-0.460905	1.0854	-0.0405929	0.812601
endo197	14.6	0	70	3	1	0.0435926	-0.00222297	0.227546	0.507267	-0.18486	0.193736	-0.0201901	0.0362756	0.325739	0.739488	-0.079259	-0.819606	-0.783591	0.471751	0.733236	0.96433	0.962234	0.429296	0.454346	0.098215	-0.201741	0.394946	0.238049	0.692131	-0.344166	0.00958426	0.51361	-0.0611989	0.0199311	0.762923	-0.3718	0.142482	-0.619157	0.806685	0.210135	0.883343	-0.384585	1.29556	0.569604	-2.05106	0.14389	2.03443	0.18036	1.58668
endo199	11.8667	0	55	1	1	0.512238	-1.03424	-0.223884	-0.688981	-0.424412	-0.23828	0.2211	-0.595016	0.64745	1.27172	0.789241	-1.60151	0.852446	0.00486088	0.957097	0.70327	0.991455	1.02892	0.633973	-0.201321	1.51627	0.20866	0.823851	0.486372	0.257636	0.333918	0.0339433	-0.305452	-0.0302332	0.313389	-0.699335	0.530409	0.539611	0.674097	0.365033	0.10247	0.540722	0.254353	0.601857	-0.168626	0.26413	-0.784949	0.159226	1.73058
endo200	21.0333	0	75	2	1	0.209457	-0.641933	-0.361178	0.256881	-0.268772	-1.10989	-1.20275	0.213192	0.24484	0.667503	0.418805	0.444874	1.55186	-0.890717	-0.333167	1.05574	-0.459932	0.876601	-0.0457579	0.0665457	-0.184245	0.245116	0.238718	1.13628	0.214212	0.161074	0.373947	-0.111305	0.142451	-0.24298	3.3488	0.716173	0.0101547	0.648517	0.122857	0.371036	-1.085	0.440378	0.0396149	-1.63618	1.4218	-2.33991	0.0697091	-0.0387028
endo201	0.733333	0	77	2	1	0.288372	0.518866	-0.20714	-0.570235	-0.715821	0.308035	0.382349	-0.508161	1.06212	0.469541	0.427941	0.277136	0.796709	0.147877	-1.18896	0.423291	0.872432	-0.074928	1.05512	-0.327798	0.57007	0.278495	0.277216	-0.0570707	-0.159895	0.18941	-0.204624	-0.372156	0.0141776	2.49288	-0.714796	0.586097	0.577981	0.0615621	0.314745	0.0785103	0.111049	0.503875	-0.013902	1.84577	0.127691	0.849702	-0.229023	1.33366
endo203	1.43333	0	28	2	1	-0.102388	-0.636197	-0.33578	0.447767	0.661995	-0.392972	-0.841038	-0.043025	1.94768	1.7023	0.0729445	0.268552	0.366744	-0.339965	1.13126	0.156821	0.379058	0.146043	-0.164858	-0.0769075	1.75047	-0.190204	-0.251813	-0.137744	-0.376631	-0.0761688	0.155431	0.00972919	-0.000257192	0.0641359	-1.18658	-0.101277	0.41934	-0.591258	-0.0886972	-0.0768183	0.388654	0.00438171	0.143373	0.193491	-0.494429	-1.26342	-0.418134	0.0136728
endo204	1.3	0	69	2	1	0.365744	-0.298081	-0.0799504	-0.243457	0.461573	-0.780274	-0.961666	-0.723847	2.17854	1.76054	0.729615	-0.125916	0.200609	0.222243	-0.316465	0.689538	0.328786	0.0121839	0.225832	0.356065	0.563052	-0.0235027	-0.163663	-0.526311	-0.188912	0.269364	-0.269167	-0.0984001	0.124701	0.28378	-1.03062	0.697746	0.354396	-0.110111	0.236037	-0.00176895	-0.200732	0.250172	0.67574	0.107915	0.217772	-2.36178	-0.00550803	0.166458
endo207	3.33333	1	68	3	2	-0.165438	0.129798	-0.206844	0.444033	-0.0173767	0.996244	0.803503	-0.115152	2.47573	2.39958	0.143143	-0.591467	0.352612	0.717254	-1.01477	0.157069	-1.33091	-1.01262	-0.256119	0.196628	1.00596	-0.428641	-0.376936	-0.147204	-0.715665	-0.248774	0.223245	-0.00578274	-0.0642563	0.626473	-0.461059	-0.214947	-0.113308	0.017517	-0.2414	-0.258729	0.636754	-0.273691	0.364244	1.4112	0.0313349	1.0398	0.177327	-0.450896
endo208	1	0	70	3	1	0.687345	-0.156681	-0.313091	-1.13856	-1.0439	-1.45339	-0.580478	-0.295325	-0.483727	-0.31256	-0.826093	-2.01067	0.28361	0.222521	-2.91458	2.2544	0.203563	-0.678586	1.38741	0.40547	-1.82489	1.24257	0.171378	0.601669	0.136353	0.808319	1.66483	-0.315946	0.152488	0.765307	-1.15372	1.2848	1.07911	0.524331	0.710381	0.594616	-0.395012	0.809167	0.563435	-1.34373	0.369854	0.241565	0.6934	0.382861
endo209	4.93333	0	67	2	1	0.217287	-1.2383	0.485958	0.175571	-0.458676	-0.495227	-0.960935	-0.85291	2.48415	2.1593	0.707284	0.477279	0.0700875	0.117474	1.92294	0.736368	0.225145	0.55176	0.170158	0.174823	-0.378903	0.261401	0.309436	-0.0711452	0.258129	0.169521	-0.18976	0.0601763	0.00796436	-0.210163	-1.45746	0.308448	0.754391	-0.227992	0.736865	-0.0598298	0.285495	0.0561266	0.608215	-0.68164	-0.312747	-0.518253	0.107966	-0.428013
endo210	4.6	0	48	2	1	0.516888	0.400432	-0.0470407	-0.74427	0.286334	-0.187102	-0.423441	-0.34852	0.193418	2.1755	1.27805	-0.199332	1.03302	0.340755	0.215847	0.697613	1.24868	1.02699	0.704899	0.0519525	0.0591617	-0.0590482	0.460668	0.940169	0.102179	0.443366	0.112552	-0.344856	0.115348	1.86099	0.927263	0.851717	0.896194	1.46138	0.463391	0.430361	-0.487981	0.349628	0.366147	1.69088	0.423246	-0.832641	0.101439	0.483931
endo211	5.96667	0	47	2	1	-0.199944	-0.554906	-0.238754	0.568272	0.177599	0.177414	-0.141811	0.321305	1.29055	1.00958	0.204911	-1.26388	0.072006	-0.0822824	-0.746153	-0.310906	-0.597194	-0.46747	-0.100148	-0.284839	1.72028	-0.402874	-0.954605	0.0076725	-0.783457	-0.237962	0.0577762	0.0529515	0.162493	-0.473903	0.28066	-0.371446	-0.00248032	-0.522222	-0.223481	-0.00944028	0.200624	0.0401143	-0.712016	0.709342	-0.472441	-0.388179	-0.372846	-0.144405
endo212	7.26667	0	73	1	1	0.0131089	0.0435761	-0.165205	-0.0595012	0.939963	-0.228002	-0.733789	0.0639032	1.66834	1.35216	-0.00773959	0.0614023	1.17044	0.489424	0.994667	0.390535	-0.256326	-0.831572	0.150339	0.305576	1.39419	0.0291539	0.496574	0.412494	-0.477301	0.161463	-0.0579568	0.218091	0.247703	-0.606609	-0.178916	0.311153	0.0375002	-0.230738	-0.128176	0.292983	0.157058	0.106306	0.00814004	1.54402	-0.136667	-0.63961	-0.168831	-0.340679
endo214	5.76667	0	52	2	1	-0.00901904	-0.628203	0.210319	-0.290677	0.603926	-1.21251	-1.34478	0.500706	-0.775008	-1.51483	-0.106844	-0.217075	1.3695	-0.617114	0.421057	0.0600303	-0.459932	0.512075	0.408809	-0.178522	0.752804	0.199348	-0.355125	0.843697	0.0687761	-0.0230333	-0.200604	-0.0801029	-0.271738	-0.425759	2.87359	0.544106	-0.140255	-0.0525876	-0.0866529	0.28839	-0.0284994	-0.228217	-0.415893	-0.970723	0.436039	-1.33963	-0.0238628	-0.389529
endo215	7.03333	0	73	2	1	0.126473	0.0170348	-0.282916	-1.15831	0.774385	-0.968272	-0.622106	0.0239505	0.228559	-0.282951	0.344892	-1.00007	-0.194558	0.24945	0.309012	0.834341	-0.0439997	0.039301	0.770714	0.146032	1.11025	0.289029	0.360432	-0.0610892	-0.142706	0.197533	-0.213229	-0.207632	-0.0846095	-0.195445	-0.680457	0.436147	0.369264	0.0214713	0.10645	-0.0768183	0.493048	0.0859724	0.195323	0.984856	0.389364	0.0161706	0.160223	-0.135492
endo216	6.66667	0	57	2	1	0.0131089	-0.331976	-0.318702	-0.836462	0.796127	-0.0330203	-0.409113	0.063682	0.600549	-0.0959031	-0.168549	0.231909	0.177708	0.60322	0.563615	-0.0882436	-0.235487	-0.0602738	0.395369	-0.268639	1.96378	0.159661	-0.209492	-0.444512	-0.591845	-0.194132	-0.165304	0.0611519	-0.200953	-0.277277	0.142041	-0.150129	-0.486236	-0.260299	-0.170517	0.357911	0.809462	-0.29376	0.158919	0.537429	0.0794383	-0.162556	-0.00165267	0.493777
endo217	51.8333	1	79	3	1	0.17107	-0.300859	-0.378621	-0.36476	0.663448	0.545214	0.733256	-0.548369	1.17841	0.611999	0.394972	0.684775	0.23249	-0.172394	1.19808	0.587931	0.530166	-0.885398	0.307181	0.044349	0.647063	0.217757	-0.478849	0.0782838	-0.0383833	0.0760103	-0.27617	-0.29536	0.0283903	0.890206	-1.29903	0.290227	-0.0831799	-0.057636	0.288927	0.0891345	-0.486316	0.463152	0.0795129	0.702126	0.0791655	0.328132	-0.111554	1.94017
endo218	60	0	54	2	2	0.213118	-0.0746088	-0.342188	0.468613	0.0194095	0.469303	0.704037	-0.43878	2.1065	2.28825	0.0842363	-0.687499	-0.117	0.660708	1.05077	0.119136	0.828905	0.212169	-0.0548228	0.0158451	0.421124	-0.0104697	-0.284176	-0.031982	0.0898188	0.115196	-0.586028	-0.152259	0.218329	3.82599	0.476199	0.308784	-0.0907272	0.136392	0.152364	0.234099	0.146807	-0.106076	0.506172	0.174598	0.233162	1.14692	0.0197574	0.782427
endo219	60	0	59	1	1	0.187099	-1.02851	-0.106156	-0.312342	0.635389	0.118418	-0.385279	-0.679589	1.85943	1.20873	0.553792	-0.813435	-0.204575	-0.538932	0.85034	0.763549	0.479545	0.331693	0.596501	-0.0307906	1.02554	0.262031	-0.388383	-0.124652	-0.37807	0.0449187	-0.116882	-0.235987	-0.0787187	0.172536	0.621317	0.245374	-0.166414	-0.320162	-0.166517	0.580731	0.281156	-0.15591	0.48833	-0.726054	0.289227	-1.4041	-0.0943234	-0.0209183
endo222	60	0	62	2	1	0.194422	-0.840731	0.177914	0.149903	0.562794	0.701037	0.210314	-0.939433	-0.932527	-1.09724	0.209264	-0.803885	-0.823941	0.504235	0.723568	0.746434	0.261577	-1.27121	0.441052	0.172265	0.763976	0.192424	-0.860057	-0.0142268	0.427535	0.200774	-0.496951	-0.0208013	-0.0337265	-0.503583	-1.40046	0.151554	0.373017	-0.194834	0.139588	0.121804	0.790806	0.0315617	0.233746	-0.566233	0.122808	0.843772	0.415834	-0.358073
endo223	47.0333	0	75	1	1	0.383097	-0.876876	0.368604	1.29454	-0.898683	-1.68378	-2.06252	0.193718	0.263137	-0.581973	0.0982055	-0.902089	1.25131	-0.935256	-0.6768	1.31775	-0.640392	0.848809	0.00411183	0.0957977	-1.38863	0.259059	0.231607	0.405226	0.00335227	0.505542	0.236142	-0.496132	-0.113927	-0.64255	3.01031	0.895908	0.497379	0.559087	0.218598	0.383659	-1.34558	0.395215	0.05774	-1.66576	1.97676	-2.35525	0.110566	-0.109037
endo224	60	0	62	1	1	0.0441261	-0.966859	1.20386	0.657938	-0.306365	-1.429	-1.68	0.460903	0.354469	-0.469055	0.682117	-1.25973	0.331091	-0.784386	0.124662	0.335622	-0.459932	0.909851	-0.100705	0.0634981	-0.137297	-0.185088	-0.539353	0.563641	0.277343	0.0697944	-0.320756	-0.367649	-0.175392	-0.7977	3.04492	0.655156	0.116141	0.666624	-0.0475404	0.311071	-0.927238	0.088737	0.0794576	-1.92742	1.12866	-2.66373	-0.0625119	-0.413072
endo225	42.9667	1	78	1	1	0.365486	-1.16693	1.0202	1.26227	-0.812147	-1.30926	-1.15377	-1.23164	0.12331	-0.469111	0.245575	-0.771903	1.22593	-0.374169	-0.530048	1.16332	-0.229302	1.29121	0.318284	0.0482943	-1.18396	0.471336	0.32371	0.74952	0.531954	0.373347	0.400368	-0.391043	0.0302942	-0.0505879	4.36894	0.926455	0.355633	0.646725	0.196488	0.521677	-0.953299	0.313879	0.0986761	-1.89865	2.10194	-2.75775	0.040031	-0.231413
endo226	60	0	53	1	1	0.0595474	-1.46727	-0.16861	0.670535	0.494321	0.576438	0.106483	-0.654091	2.44365	1.67967	0.586197	-0.975332	0.340514	0.229517	0.906217	-0.0447785	0.083436	-0.20771	0.428429	-0.00323798	1.20983	0.273684	-0.506203	-0.00476447	-0.589245	-0.00969767	0.0183538	-0.214803	-0.150795	-0.4529	0.853768	0.337751	0.0801819	-0.253177	-0.109239	0.70795	0.270516	-0.256105	0.452605	-0.958607	-0.0362958	-1.03858	0.0980021	0.889865
endo227	34.2333	0	65	1	1	0.175184	-1.20368	-0.343917	0.476221	-0.0946878	0.317172	-0.188847	-0.673823	2.28332	1.76645	0.533199	0.11359	0.523472	-0.259025	1.37327	0.587931	0.00503492	0.397525	0.203898	0.194011	-0.263797	0.222476	-0.138838	0.158086	-0.382018	0.160611	-0.106611	-0.217662	-0.175228	0.847576	0.625859	0.402647	-0.02209	-0.171557	-0.087884	0.48807	-0.0153043	0.0385312	0.68497	-1.17369	0.485053	-1.70499	-0.0398225	1.06628
endo228	50.9333	0	57	2	1	0.112527	-0.648374	0.575947	-0.360606	-0.753515	-1.34544	-1.6018	0.633232	0.526869	-0.398193	0.603931	0.319307	0.401224	-0.882801	-0.10109	0.729729	-0.314765	0.565362	-0.353942	0.498636	-0.351003	-0.171574	-0.685627	0.452431	0.279356	0.267772	-0.380868	-0.305454	-0.106697	-0.544875	3.36177	0.66794	-0.0683774	0.493531	-0.0407347	-0.0570984	-1.42426	0.0473494	0.215365	-1.65173	1.62346	-2.67006	-0.122443	-0.427046
endo229	16.5333	1	89	2	1	-0.0376398	-0.87264	0.152456	0.793562	1.14308	-0.227545	-0.77315	-0.0426383	2.09369	2.62554	0.349784	-0.658925	1.09747	-0.726587	0.75811	0.484689	-0.10336	0.690565	0.0243956	-0.0142031	1.74925	0.0630388	0.563292	0.0849071	0.209281	0.0624772	-0.137522	0.0553985	-0.0194496	-0.27147	-0.752832	-0.0220147	-0.263119	-0.44248	-0.132677	0.819113	0.433924	-0.0359761	0.472868	-0.0704569	0.135138	-1.40551	-0.0727494	-0.34137
endo230	53.3	0	73	2	1	0.294953	-0.789735	-0.323264	-0.588293	-0.364615	-1.39632	-1.47887	0.0871701	0.473168	0.255233	0.278293	-0.261177	0.653615	-0.580484	0.812045	1.10966	0.188887	0.811054	0.385044	0.463113	-0.390099	0.224325	0.321464	-0.22017	0.990243	0.35075	0.822158	-0.309418	-0.0303267	-0.241087	2.43712	0.772551	0.11849	0.225407	0.26489	0.0716673	-0.726826	0.241543	0.358906	-0.474586	1.02513	-2.78616	0.145876	0.200179
endo231	56.5	0	59	2	2	-0.048872	-0.60139	0.0507847	-0.900643	0.775943	-0.330523	-0.582406	-0.0229399	0.697841	0.282799	-0.304539	-0.144273	0.625323	0.032294	1.04172	0.107937	-0.0247272	0.00320242	0.165674	-0.13648	0.857806	0.122318	0.0308111	-0.19792	-0.435076	-0.0771301	0.25994	0.109515	-0.192247	0.78085	1.36149	0.0906243	-0.716814	-0.063194	-0.116419	0.104619	0.671607	0.139421	0.337394	-0.150143	0.269969	0.0094463	-0.0858871	1.14875
endo232	14.9	0	48	2	2	0.204219	-0.0184034	-0.532566	-0.745269	0.790294	0.103881	0.251678	-0.0307238	0.834508	0.212625	0.674506	0.0462211	-0.639157	1.24048	0.448604	1.18418	-0.193444	-0.945429	0.342296	0.334208	0.617412	0.457614	0.199335	-0.059495	-0.36746	0.149714	0.090006	0.128179	-0.0480457	1.60089	0.992108	0.485302	-0.257594	-0.20374	0.0627984	0.245121	0.720685	0.416368	0.25314	0.670748	0.254339	0.452967	-0.00479943	0.965111
endo235	60	0	57	2	1	0.142472	-0.721929	0.0257715	0.313882	-1.16603	-0.753933	-0.896002	-0.826042	1.29138	0.902244	-0.389901	-0.95295	-0.729685	-0.0138699	-1.20777	0.594675	0.0825944	0.764579	0.121586	-0.286617	0.330171	-0.0191412	-0.131964	-0.253194	0.108333	0.122417	-0.0874422	-0.509387	0.193646	1.3773	0.703208	0.0940579	-0.0101477	-0.172446	0.0761135	0.0487071	-0.214027	-0.0237956	-0.0837013	0.304459	0.114037	0.12661	0.0187508	0.597099
endo238	56.5667	0	84	3	1	0.109843	-0.853176	-0.526198	-0.21959	0.163733	1.18641	0.667597	-0.381134	2.3916	1.50589	0.407459	-0.35506	1.00712	-0.180271	-1.86378	0.862791	0.295513	-0.298327	-0.109704	0.0706494	0.121653	-0.0285181	-0.509559	-0.11808	1.00063	0.101332	0.151941	-0.0543203	-0.00517072	2.1663	-1.54455	0.291066	-0.168848	-0.141515	-0.1062	0.0487316	0.162776	-0.0307888	0.502072	0.468663	0.625485	0.35831	-0.0763089	0.645357
endo242	7.76667	0	63	2	2	0.263343	-0.491704	0.13291	-0.348383	0.509678	0.164631	-0.2153	-0.900635	1.91646	2.09489	-0.197261	-0.39447	0.019327	-0.358781	-0.150892	-0.39579	0.644469	0.00702165	0.548119	-0.217638	1.92931	0.337452	0.159592	-0.412485	-0.135177	0.000382611	-0.779721	-0.0891289	0.00580033	0.999509	0.299349	0.131348	-0.233898	-0.16923	0.193345	0.238361	0.639454	0.260306	0.463395	-0.194115	-0.00326607	0.119749	-0.0751651	1.29385
endo243	13.5333	0	49	1	1	0.334293	0.167155	0.0126272	-0.471933	0.462973	-0.227526	-0.0605291	-0.314325	0.822937	1.13348	0.30342	-0.377445	0.568546	-0.0534094	0.963832	0.587931	1.02875	0.806561	0.520906	0.126036	-0.446217	0.0816512	0.513091	-0.238875	-0.174454	0.187836	-0.674517	-0.291032	0.0176415	2.58652	0.487158	0.480372	0.18711	-0.307509	0.276735	0.213662	-0.692729	0.0719116	0.429044	0.69948	0.22374	-0.904889	-0.0463903	0.539595
endo244	0.2	1	54	1	1	-0.00307901	0.0423013	-0.100234	-0.063611	0.804442	-0.00951756	0.364145	-0.0669697	1.44645	0.674136	0.28407	0.0705398	0.694718	1.096	1.07997	1.0417	0.724294	0.0994869	0.24052	0.166945	0.669138	0.305958	-0.100429	-0.37643	-0.295218	0.15422	-0.197247	-0.165628	-0.00540092	2.87228	-0.405737	0.245765	-0.313875	-0.211202	0.222079	0.39174	-0.0285121	0.460713	0.565663	0.700323	-0.131664	-0.650433	0.0491652	0.468052
endo245	8.5	0	57	2	1	0.284173	0.0402558	-0.00238235	0.0287542	-0.223703	0.233052	0.396192	-0.124121	1.34389	0.857155	0.267566	0.107834	-0.027278	0.374141	0.341012	0.501028	0.819486	0.802375	0.256508	0.353319	0.222443	0.102737	0.212009	-0.169391	0.255748	0.106338	-0.321792	-0.513119	-0.0802936	2.1829	2.04503	0.521339	-0.416342	0.312582	0.1793	0.393534	-0.624283	0.252625	0.52446	0.0831164	0.628278	-0.0511195	0.595444	0.799929
endo246	10.5667	0	34	1	1	0.156251	-0.383784	-0.29586	-0.763019	0.393962	0.0210753	-0.300598	-0.44465	1.64085	1.03418	0.373166	0.741341	0.376945	-0.332452	1.49861	0.623287	0.396518	0.384791	0.0373769	0.0505274	0.221419	-0.0634057	0.0989059	0.178148	-0.321577	0.0898553	-0.180597	0.124837	-0.0501666	2.79506	-0.335713	0.104301	0.147064	-0.322406	0.0306973	0.380962	0.297316	-0.0302139	0.408476	-0.420198	-0.285852	-0.61782	-0.241874	0.0697771
endo247	9.46667	0	47	1	1	0.0907057	-0.413774	0.129263	-0.705404	0.604836	-1.08327	-1.15877	-0.0800004	0.211674	-0.570803	0.324231	0.463406	0.164918	-0.477959	1.54593	0.286997	0.412456	0.551122	0.146273	0.0760693	0.0249035	-0.119388	0.954508	-0.0321893	0.340586	0.0656848	-0.539184	0.130524	-0.231756	1.9753	0.54215	0.198879	0.0602053	-0.24529	-0.0641756	-0.153892	0.310275	-0.19868	0.327085	-0.112612	-0.345869	-0.968055	-0.269277	-0.444175
endo250	4.8	0	54	1	1	0.131488	-0.460697	-0.29087	-0.741982	0.390628	0.494835	0.280825	-0.681331	1.48276	0.624743	0.294413	0.482785	0.0295084	-0.44463	0.757207	-0.00976432	0.303732	0.108186	0.384504	-0.248474	0.907301	0.183431	-0.203176	-0.0779402	-0.420014	0.0165992	-0.623763	-0.0651788	-0.132305	3.31757	0.770348	0.321451	0.00761484	-0.245664	-0.0762016	0.630358	0.811063	-0.0160996	0.315903	-0.12945	-0.413177	-0.322836	-0.218863	0.64883
endo1	41.2333	0	62	3	3	0.995436	-0.326983	0.179984	-0.0741318	-0.958146	0.115361	-0.285535	-0.909578	-0.0695461	1.06497	1.11247	-2.28934	0.239186	0.238565	-2.42147	1.97218	1.91803	-0.474276	0.945867	0.520164	-1.25578	0.211414	-0.264022	0.838199	0.148224	0.682828	1.87477	-0.456144	0.240182	0.523678	-0.745058	1.16167	0.664608	0.714996	1.2123	0.817427	-0.345502	0.644102	0.189618	-0.64902	0.191154	-0.626174	0.577322	1.1912
endo3	47.4	0	55	3	3	0.326935	-0.0454731	-0.355038	-1.06238	-0.198433	-0.314864	-0.0369317	-0.916926	-1.10749	0.103418	0.463747	-0.352337	-0.38671	2.03764	0.343487	0.916616	0.0105633	0.526709	0.374305	0.180085	1.00228	0.369221	0.29787	0.163727	-0.367702	0.180572	0.203455	-0.439163	-0.102312	2.29875	-1.42748	0.307732	0.245753	0.529169	0.0219889	0.317075	0.204433	0.128194	0.347008	-0.916046	0.281548	1.09395	0.101042	2.09857
endo4	0.433333	1	68	3	3	0.551732	0.249694	-0.31415	-1.46206	0.723474	0.937862	1.17581	-0.706195	0.238615	0.684453	0.461715	-0.607858	-0.520564	1.05934	2	1.87818	1.43494	-0.230189	0.390992	0.0696015	-0.116481	0.653065	-0.149076	0.473277	-0.102882	0.335703	1.41426	-0.194128	-0.0385838	1.47949	0.691851	0.377245	0.461887	0.69918	0.20862	0.501006	1.42718	0.221647	0.922427	-1.73747	0.315099	1.36516	0.998617	1.5906
endo13	60	0	46	2	3	0.328237	-0.789741	-0.334028	0.175489	0.28723	-0.397886	-0.593606	-0.774469	0.733399	1.46907	1.0269	-2.51475	-0.613415	-0.158252	-0.00437801	0.769457	-0.0116156	0.676943	0.541734	0.0995285	0.0661153	0.171911	0.367959	0.388297	1.1897	0.295811	0.173527	-0.764753	-0.103454	0.483175	-1.21831	0.406748	0.324266	0.623968	0.198116	0.0527238	0.649647	0.129682	0.218608	0.149507	0.868595	-1.45511	0.194192	0.116357
endo15	60	0	61	2	4	0.44519	0.09576	-0.316667	0.080524	-0.962637	-0.381181	-0.0318463	-0.619009	-0.390438	1.71497	0.703341	-0.741029	-0.323944	0.119188	-1.68022	1.51925	0.378432	-0.637157	0.0930159	-0.151463	-0.019917	0.535426	0.148012	0.830374	-0.178166	0.382085	0.611962	-0.362905	-0.00126037	0.937273	-0.561772	0.477706	0.444245	1.27755	0.209953	-0.0768183	-0.117663	0.34379	0.165286	0.132471	0.561325	-0.207135	1.12685	-0.0363019
endo16	18.9667	0	54	2	3	0.552993	0.217287	-0.0685269	-0.599791	-0.0177856	0.868427	1.31691	-1.00672	0.993239	1.06498	0.731079	-0.954988	0.313342	0.783069	-0.787196	1.52045	0.464402	-0.350203	0.534492	-0.201446	-0.416502	0.354135	-0.0481345	0.23853	-0.146237	0.313903	-0.041994	-0.565844	0.236643	0.460566	-0.840941	0.600332	0.576961	0.514254	0.278107	0.583116	0.417426	0.369553	0.563835	0.0699987	-0.0268816	0.973052	0.192675	0.603832
endo18	50.8	0	55	3	4	0.348834	-0.159075	0.28326	0.22735	-1.06086	0.210111	0.493219	-1.30451	-0.787747	-0.3921	0.225707	-1.91876	-0.487976	2.72905	0.0929083	1.38737	1.12944	0.0325968	0.603177	0.261961	-0.569256	0.293569	0.26598	-0.316399	0.0302744	0.322657	0.151407	-0.35789	-0.0564544	3.27305	1.05365	0.599973	0.282288	0.37379	0.141332	0.220059	-0.814209	0.0675492	0.200062	-1.39111	0.419306	1.42739	0.140087	1.77194
endo19	31.9	0	46	2	3	0.384234	-0.267149	0.499551	-1.09791	0.0895253	-0.359827	-0.186892	-1.03248	0.669804	0.349194	0.479105	-0.407974	0.687528	0.901664	1.4492	1.41803	0.699252	-0.820814	0.381128	0.126721	0.333393	0.549154	-0.151136	0.0282324	-0.247944	0.299599	0.54539	-0.41421	0.014755	0.519843	-1.163	0.531065	0.527047	0.337652	0.201221	0.284295	1.11955	0.368525	0.498065	-0.142819	-0.0745716	-0.847594	0.254474	0.192762
endo28	6.46667	1	83	3	4	0.708525	-0.708404	-0.295981	1.46762	-1.24546	0.44564	0.499264	-1.05928	1.58044	1.49192	0.835905	-2.80041	-0.101747	0.419782	0.363447	1.8313	0.607434	-0.721964	0.515299	0.0257249	-1.29722	0.572416	-0.110959	0.553587	-0.0784565	0.528891	0.661852	-0.497621	0.315969	1.03273	-1.76112	0.823404	0.658817	0.562695	0.177638	0.36177	0.196772	0.459119	0.670216	-0.22996	1.26052	-0.259771	0.432698	2.87064
endo39	60	0	89	2	3	0.742258	-0.773714	0.267919	-0.0120462	-2.10853	-0.963504	-1.3254	-0.510377	0.24412	1.57436	0.770226	-0.220522	0.198667	-0.283794	-0.494805	1.62502	1.06264	1.57158	0.389447	0.351283	-0.141172	0.553008	0.0213779	0.711872	0.772356	0.511448	0.0560173	-0.513006	0.138709	1.58008	3.79861	0.986166	0.619926	1.27203	0.273067	0.334324	-0.132243	0.634452	0.270558	-1.4358	1.3079	-1.7847	0.269519	0.411606
endo62	53.8333	0	71	2	3	0.209931	0.119166	-0.455533	-0.699214	-0.351074	0.679058	0.978605	-0.265215	0.344639	-0.108148	-0.314999	-0.749594	-0.310217	1.29411	-1.51409	0.839717	-0.235363	-0.427424	0.870672	0.154786	-0.150342	0.565332	-0.483078	-0.25336	-0.304577	0.208038	1.35381	-0.270826	-0.000458383	1.05356	-0.501856	0.933171	1.13609	0.0597051	0.469279	0.183163	0.63037	0.719641	-0.000980168	1.16462	0.357901	-0.141925	0.354357	-0.33572
endo63	8.46667	1	79	2	3	0.590159	0.11317	-0.0136468	0.926194	-0.00790338	0.0135483	-0.0526849	-0.442375	1.45651	1.91803	0.879676	-1.00245	0.0604224	0.342438	0.28128	1.66583	0.825554	0.652121	0.482056	0.138311	-0.00758383	0.404661	0.0887814	0.4051	0.199894	0.451896	1.31363	-0.536434	0.229634	0.917157	-0.404284	0.576718	0.771157	0.410857	0.808075	0.392903	0.0664423	0.633542	0.457361	0.0388859	-0.00997316	-0.652841	1.09161	0.30663
endo68	35.3	0	77	2	3	0.0960091	-0.226313	-0.484441	-0.121147	0.446539	1.01897	0.785675	-1.01866	-0.717533	-0.627262	0.471017	0.793404	-0.507863	0.26686	1.35531	1.07024	0.31107	-0.171758	0.277291	0.393418	0.618153	0.106392	0.0315449	0.0367807	0.08563	-0.0171866	0.453357	-0.43381	-0.0945933	-0.131345	-1.59351	0.357223	-0.0410785	0.28373	0.0477968	0.188675	0.344345	0.360691	0.649819	0.468879	-0.366463	1.65256	-0.0991069	1.74263
endo72	57	0	53	2	3	0.923931	-0.125084	-0.401781	-0.589339	-1.42438	-0.157278	-0.809336	-0.288531	-0.406841	0.395434	-0.116176	-0.924197	-0.265767	-1.05691	-0.506981	2.77525	0.0907846	0.379625	1.02881	0.507132	-1.33357	1.30679	0.486839	0.703086	0.88508	0.460181	1.52672	-0.719329	0.0522509	0.263451	2.43045	0.627658	0.153633	0.593301	0.259858	0.0557329	-0.877939	-0.0211162	-0.182278	-1.37286	2.12201	-2.00994	0.915526	0.492744
endo81	25.3333	1	52	2	3	0.00534829	-0.260586	-0.532521	-0.213132	0.718636	1.04191	0.94814	-0.121886	2.98503	2.34952	0.601497	0.0724126	1.40688	0.464335	0.0708371	0.166201	0.579032	0.512237	0.0200296	0.231709	0.80214	0.00891984	-0.127415	-0.117407	-0.239425	-0.0261807	-0.309626	-0.00301072	0.164826	0.0657401	-0.73581	0.153865	-0.0595555	0.0408656	-0.120829	-0.210083	-0.280778	-0.150286	0.234039	1.58674	-0.369782	0.0737828	-0.163674	0.539229
endo95	16.0333	1	61.5852	2	3	0.154879	0.228175	-0.298586	-0.76379	0.623661	0.411138	0.300645	0.0679097	1.0513	0.178713	0.333481	0.318849	-0.778456	-0.633946	-1.07541	2.89208	-0.511624	0.0198235	0.685503	-0.202429	1.53794	0.271997	0.35642	-0.233801	-0.0476282	-0.140099	0.135323	-0.130155	-0.254698	-0.036969	1.12831	0.365036	0.0262989	-0.0949913	-0.0347922	0.345501	0.607152	-0.193332	-0.148468	0.807585	-0.389468	0.0224237	0.349141	-0.253596
endo96	14.9333	1	31.5099	3	4	-0.0759338	0.506835	-0.203945	0.808475	0.137391	0.64179	0.292966	-0.0369029	1.17702	1.18824	-0.0529636	0.0397867	-0.935398	0.334552	0.692345	0.828515	-0.203081	0.0186689	0.0404162	0.00591923	-0.0176239	0.044005	0.304297	0.386444	-0.427694	-0.0455677	-0.00621125	0.319365	0.23971	-0.349688	-1.83101	-0.0675121	-0.545625	0.231347	0.0414737	0.0494021	-0.875128	0.0391122	0.130294	0.277932	-0.0238522	1.05132	-0.118563	1.00995
endo98	38.4	0	66.768	2	4	0.29057	0.4798	-0.566131	-2.01073	0.669103	-0.408321	0.785288	-0.0891123	-1.01909	-0.143538	0.475344	0.209949	-0.380225	0.215741	0.353125	0.812065	0.909014	0.10406	0.534085	-0.243424	0.649197	0.0080573	0.0747946	0.155014	-0.0498227	0.198503	-0.236396	-0.153961	-0.15111	0.550082	0.424942	0.420326	0.283711	0.400876	0.0326793	-0.0233828	0.0241497	-0.0308791	0.190608	1.04631	-0.0594777	0.7275	-0.139103	1.42184
endo100	40.7333	0	58.7296	3	3	0.0501199	0.634675	-0.448443	-0.512761	0.438788	0.703846	0.796637	0.0890481	0.992062	0.667292	0.0504401	0.368967	-0.0817486	1.86967	-0.0600417	0.273833	0.174889	-0.414131	0.200402	-0.20614	0.509005	0.0162726	-0.181282	-0.174786	-0.496297	-0.0387508	-0.352403	0.0960549	-0.192591	1.02929	-0.984848	-0.00937869	-0.532212	0.0751629	-0.159484	0.0454417	-0.343558	0.0836097	0.163459	1.12795	0.307733	0.69953	-0.0538884	0.370702
endo101	37.0667	0	65.2293	2	4	0.46441	-1.26771	-0.202399	1.14153	1.12307	0.191767	-0.192349	-0.343075	-0.216952	1.06644	0.0448881	-2.18036	-0.347537	-0.539918	-0.358041	0.232988	-0.308711	-0.767547	0.70767	-0.439947	1.15835	0.615145	-0.202693	0.493893	-0.303354	-0.134984	0.027828	-0.0154874	-0.18332	-0.28801	-0.792411	0.104399	-0.207957	0.0301741	0.0717893	0.0719092	1.26179	-0.260511	0.038538	-0.19004	-0.115446	0.165851	0.394815	1.8279
endo108	37.1333	0	81.2156	2	3	0.122216	-0.424192	-0.237479	-1.09723	0.548678	0.287695	0.52532	-0.133709	1.72342	1.33121	0.741391	1.03898	1.12889	-0.501112	1.31573	0.568221	0.376952	0.21081	0.281479	-0.0981846	-0.0589036	0.121691	0.466425	0.198751	-0.164167	-0.0453789	0.0302645	-0.0851518	-0.132513	-0.110779	-0.732618	0.195609	-0.0772744	0.157681	-0.00697715	-0.05167	0.440902	0.207227	0.478993	1.19873	0.202527	-0.0635735	-0.0834929	0.896447
endo114	24.4	0	73.5277	2	3	0.086488	-0.102195	-0.529626	0.520623	0.171517	0.614538	0.46841	0.152682	0.126992	1.7885	0.747688	-1.44956	1.12346	0.486561	0.214562	0.42162	0.404514	-0.801511	0.158131	-0.284945	1.0799	-0.194066	-0.304414	0.764093	-0.538436	-0.0263987	-0.515944	-0.311058	0.0818173	-0.0385724	-1.6889	0.196194	-0.260419	1.23854	-0.159411	0.00483762	0.601879	0.282831	-0.02446	1.77011	-0.0165908	1.18927	-0.154447	0.532504
endo122	16.2333	0	59.9589	2	3	0.449578	0.113796	0.256075	0.588065	-0.00868705	-0.948105	-0.585727	-0.702783	-0.0766576	2.50391	1.40378	-1.41352	-0.128396	0.156503	-0.460605	0.587931	1.05429	0.380107	0.440776	-0.335924	0.603033	0.139867	0.135791	1.41002	0.305973	0.417485	-0.00847501	-0.494832	0.0627808	0.773928	-0.48186	0.937846	0.766324	1.79629	0.26651	0.0980169	-0.517605	0.352371	0.313748	0.260054	0.140896	-1.01676	-0.0179314	1.09517
endo127	15.2333	0	70.1903	2	3	0.265247	0.370921	-0.343415	-1.14089	0.490297	-0.455535	0.0226177	0.136078	-0.174585	0.734412	0.431284	0.157098	-0.847943	0.726834	-0.830127	0.63502	0.16954	-0.566745	0.647323	0.126272	0.492004	0.147195	0.751555	0.0876209	-0.261992	0.0929703	-0.302227	0.0272419	-0.110457	0.82459	-0.888339	0.420571	0.0773414	0.550726	0.205574	-0.155428	0.0740012	0.031347	0.180328	2.12237	-0.380631	1.1302	0.292881	0.323201
endo144	16.7	0	58.8392	2	3	0.450569	0.35336	-0.197384	-1.41584	-0.31361	-0.668071	-0.330808	-0.863331	-0.733477	0.404458	0.453126	0.185879	0.437742	0.141895	0.789338	0.941994	1.70015	1.15275	0.520552	-0.264813	-1.80293	0.0450319	0.855835	0.127605	0.591244	0.27377	0.0228091	-0.339895	-0.128591	1.08117	-0.751216	0.272009	0.5022	0.796745	0.517454	0.280982	0.526159	2.49437	0.677162	0.852496	-0.135727	1.33569	-0.0819056	-0.234453
endo156	27.2667	0	62.9541	2	3	0.237559	-0.735606	1.32024	-1.06483	-0.968774	-1.18334	-0.611358	-0.263879	0.176827	-0.366676	0.120322	-0.869746	-0.0215856	-0.362028	-0.78614	0.595277	0.00606305	0.820034	0.945173	-0.178082	-0.631354	0.69403	-0.218939	-0.496189	0.662117	0.0261774	0.319391	-0.439044	-0.0434523	0.70207	3.46375	0.842199	-0.223416	0.777482	0.308213	0.0857546	-0.742979	-0.142982	0.0767291	-1.15392	0.705859	-1.51878	0.168524	0.224925
endo160	27.2	0	60.4545	2	3	0.075127	-1.01864	0.341304	0.138273	0.498826	-0.0523943	-0.527803	-0.584057	2.20651	2.24808	0.456222	-0.30256	-0.427865	0.245691	0.653838	0.108552	0.509417	0.440118	0.203089	-0.0115792	0.225605	0.116127	0.284008	-0.019856	0.111513	-0.065368	-0.16345	0.0868314	-0.106432	0.069332	-1.23585	0.0307546	0.360933	-0.316287	0.00839653	-0.170039	0.72176	-0.0951666	0.350788	-0.0126288	0.20955	0.0253063	0.126105	0.74837
endo161	26.0667	0	53.4784	2	4	-0.0048043	-0.370676	-0.147006	-0.600652	0.592851	-0.93107	-1.02468	0.14825	0.398311	-0.180517	0.272189	0.663001	0.878075	-0.670758	1.48582	0.558983	0.0637661	0.823081	-0.0389726	0.111823	-0.21926	-0.0725735	0.241568	0.000542327	0.0682427	-0.0287939	-0.300391	0.0516848	-0.13927	-0.630555	2.12032	0.0593276	-0.122874	-0.185677	-0.0987119	-0.00961285	0.00309927	-0.146027	0.108401	-0.822709	0.324434	-0.778195	-0.217182	-0.331679
endo162	4.76667	0	70.6338	2	3	0.22482	-0.248402	-0.602087	-1.27283	0.783268	-0.789133	-0.491318	-0.30246	-0.353126	0.835753	0.634678	-0.00600383	0.31667	-0.493405	0.567771	0.850656	0.445735	0.0462987	0.472733	-0.226551	0.713489	0.0183545	0.818586	0.310484	-0.192063	0.0865528	-0.595368	-0.149613	-0.155191	-0.272863	-0.398672	0.196842	-0.245629	0.589863	-0.00796609	-0.0768183	0.172549	-0.0947135	0.440738	0.345452	0.40173	-1.28955	-0.162028	2.05425
endo168	23.0667	0	61.1636	2	4	-0.0372508	-0.535555	0.183546	-0.23121	0.656991	-0.664175	-1.03644	-0.018222	-0.0743317	0.215344	0.440308	-0.127085	0.115974	-0.306096	0.485758	0.29033	-0.0924135	0.291404	0.129576	-0.128791	0.590963	-0.00369728	-0.531144	0.157103	0.647477	-0.12712	-0.185099	-0.113158	-0.0471423	-0.0698443	1.25094	-0.0460515	0.235656	0.414922	0.010635	0.0485315	-0.474311	-0.2125	-0.0820722	-0.12538	-0.0896637	-1.06723	-0.0618624	-0.401726
endo173	22.6	0	61	3	4	-0.0130287	0.240017	-0.0224156	-0.228438	1.05364	0.682521	0.907617	-0.016416	1.41907	1.45827	-0.13916	-0.301003	0.718017	0.965336	0.547255	0.956425	-0.175583	-0.403566	0.0483214	-0.153365	0.851072	0.144868	0.582805	0.213095	-0.435295	-0.130638	0.06102	0.113279	-0.158103	1.08084	-0.885681	0.0287373	-0.313996	0.204167	-0.0846704	-0.0347584	0.765059	0.178747	0.214523	1.88844	-0.216531	1.47104	-0.205256	0.871077
endo176	20.6333	0	53	3	4	0.184956	0.118309	-0.551532	-1.09666	-0.570277	-0.231373	-0.46264	-0.725625	0.338354	-0.419994	-0.228262	0.0590022	-0.28705	0.00605155	-0.668081	0.289528	0.682817	-0.164107	0.82712	0.0739042	1.7097	0.426507	0.656118	-0.339667	-0.370241	-0.0357584	0.00282862	-0.0200073	-0.208262	1.66852	0.155165	0.141311	-0.225096	0.394335	0.145759	0.168173	0.0726051	0.192744	0.234925	-1.25786	-0.0398209	1.74883	0.34485	0.885745
endo177	29.1667	0	76	3	4	-0.000946243	0.114271	-0.171161	-1.10654	1.59867	-1.22806	-1.59247	0.509365	-0.377516	-0.40599	-0.653621	-0.276567	-0.812573	0.705677	-0.994717	0.951773	0.105156	1.32369	0.582595	-0.123086	1.02537	0.215652	1.65261	-0.365817	-0.217423	-0.0167263	-0.175371	0.201414	-0.188249	-0.108771	-1.39019	-0.00266705	-0.0316497	-0.0510306	-0.0143144	-0.0768183	0.639222	0.275143	0.310408	-0.25085	0.145647	1.03659	-0.0318115	1.99383
endo185	18.1667	0	49	2	3	0.4169	-0.871972	-0.335277	0.287315	-0.375627	-0.142096	-0.407161	-1.05016	2.18034	2.52753	0.805199	-0.3209	0.569222	0.110987	0.844183	0.805294	1.75835	0.739698	0.630382	-0.211817	-0.889294	0.284052	0.525823	0.463178	0.175219	0.340206	0.108614	-0.551748	0.177687	0.736299	0.392275	0.466929	-0.122536	0.912318	0.497138	0.360871	0.509509	0.470096	1.02616	-0.928851	0.128663	0.158344	-0.158332	2.02868
endo188	18.4	0	53	2	3	0.108525	0.0987449	-0.0208749	-0.414048	0.605421	-0.265005	-0.5587	-0.379008	0.282512	0.303592	0.311067	0.592531	0.24626	-0.236973	0.880291	0.277689	0.699975	0.610495	0.287512	-0.0461943	1.09938	-0.207432	0.333077	0.297612	0.16125	-0.0343334	-0.282392	-0.085528	-0.171092	1.48552	-0.608637	0.0094537	0.0699718	0.255821	-0.199511	-0.282335	-0.293394	-0.0237732	0.505933	0.130553	-0.229692	-0.201737	-0.155693	-0.259408
endo195	19.3333	0	66	3	4	0.0561679	0.10324	-0.103166	0.142103	-0.00923925	-0.103643	-0.472604	-0.390559	1.43077	0.508444	-0.406596	0.0946435	0.328822	0.0518258	1.11808	1.2038	0.441095	-0.274409	-0.214522	-0.270927	-0.758511	0.116027	-0.286503	-0.0194961	0.162072	-0.183147	1.30174	-0.0407898	-0.090143	2.02885	-0.300658	0.141574	-0.118806	0.0840744	-0.0682941	0.410248	0.558132	1.84742	0.439385	-0.162509	0.0787322	0.613967	-0.0611848	0.506016
endo198	9.6	1	65	2	3	-0.084004	-0.0479682	-0.290459	-0.0337569	0.54675	-0.292202	-0.5322	0.16314	0.33938	-0.0224871	0.314968	0.196654	0.709226	-0.055846	-1.11614	0.588261	0.0317154	-0.00180857	-0.0413257	0.0167447	0.925712	-0.234448	-0.340567	0.251896	-0.447984	-0.0704538	-0.644514	-0.209943	-0.125079	0.265885	-0.403987	-0.07501	-0.203999	-0.141967	-0.203539	0.0152703	-0.00246002	-0.0334209	-0.113904	1.04419	-0.238354	-0.543716	-0.281447	1.39281
endo202	1.96667	0	70	3	3	-0.0967772	-0.853277	0.0367641	-0.232992	0.294246	-0.288919	-0.801543	-0.0877084	2.78213	2.52745	0.169462	-0.838573	-0.599579	-0.00254859	-2.49688	-0.0829919	-0.0772448	-0.736537	0.390992	-0.2328	0.88293	0.196203	-0.553179	-0.00145994	-0.507843	-0.0751188	-0.39346	-0.0490313	-0.0191047	-0.583432	0.558312	0.0941428	0.0756454	-0.29539	-0.0333326	-0.0339521	0.116119	-0.165877	-0.271523	0.688054	0.12426	-0.22584	0.677354	0.0458374
endo206	3.76667	0	62	2	3	0.455541	0.356918	0.178373	-0.378212	0.204481	0.344779	-0.0317576	-0.632003	0.624072	0.932179	0.593085	0.0073972	0.548197	0.467758	-0.208302	0.703032	1.60107	0.229366	0.89579	-0.154822	-0.655976	0.292993	0.30979	0.0271966	-0.0404112	0.353284	-0.142524	-0.513567	0.0247418	0.117695	0.300182	0.61756	0.535727	0.0345484	0.67187	0.110634	-0.3867	0.170756	0.60813	1.5407	0.357598	-0.0309735	0.288903	1.73809
endo220	23.1	1	85	3	3	0.0447338	-0.286173	0.179984	0.446562	0.750337	0.118752	-0.578633	-0.155945	1.72411	0.949095	0.0302761	-0.454848	-0.726574	1.41817	-1.31052	0.366026	0.151365	-0.707129	0.800011	0.00211322	0.678001	0.205249	-0.320771	0.00423749	0.957417	-0.168209	-0.420816	-0.0789066	-0.11842	-0.196995	-0.219651	0.30662	-0.553664	-0.0970293	-0.0813777	0.138595	0.246975	0.00119777	-0.25851	-0.256147	0.638129	1.31789	0.216431	0.800876
endo221	60	0	70	3	4	0.209747	-0.161947	0.0257463	-0.00509121	0.207145	-0.0358062	-0.523813	-0.587828	2.50197	1.8992	0.787688	-0.885877	-0.234836	0.359715	1.5944	1.19813	0.718929	0.529493	0.433022	0.230049	0.631834	0.414006	0.0980508	-0.113313	-0.360737	0.177121	0.037535	-0.0652825	0.194109	0.0765678	-0.905199	0.3659	-0.153616	0.069258	0.0596567	0.711954	0.663351	0.0203356	0.722238	-0.86096	0.318868	0.277639	0.19049	0.439473
endo234	58.7667	1	63	3	4	0.329963	-1.18904	1.14356	1.37314	-0.699907	-1.27929	-1.23092	-0.710631	0.403377	-0.367188	0.202963	-0.618649	1.30026	-0.412634	0.0213521	1.23513	-0.276847	1.26372	0.139149	0.330646	-1.01503	0.317259	0.308816	0.628301	0.434612	0.289905	0.671271	-0.303613	0.0205724	-0.0715912	4.71483	1.06678	0.395312	0.542469	0.146829	0.494346	-1.01522	0.197391	0.14107	-1.80167	2.25754	-2.47126	0.203836	-0.211339
endo237	5.06667	1	65	3	3	0.422995	-0.697605	1.14556	0.326604	-1.39408	-1.57153	-1.90975	0.0548606	1.52034	1.0962	-0.121029	-0.391657	-0.147227	-0.381051	-0.782634	1.4566	0.150687	1.2551	0.417459	-0.0852918	0.00812136	0.625174	-0.271453	0.628522	0.594252	0.462626	0.47353	-0.383382	0.00519458	1.24392	4.99326	0.963627	0.406671	0.188332	0.216278	0.215291	-1.07133	0.34643	0.136534	-1.44118	1.81149	-1.68656	0.243845	0.134095
endo239	6.9	0	66	2	3	0.350138	-0.65508	0.276872	-0.149559	-0.768002	0.0873286	-0.214178	-0.954217	2.00334	1.13134	0.595265	0.359342	-0.150485	-0.0680795	1.84545	1.43096	0.624188	0.651542	0.360777	0.0818295	-1.01895	0.430413	-0.0174497	-0.0266115	-0.246583	0.354182	0.322753	-0.096122	0.0922248	0.965881	-1.07052	0.496414	1.12685	0.0534965	0.280739	0.25289	0.680855	0.248956	0.765307	-1.08774	0.145754	0.111722	0.177856	-0.0693878
endo241	17.6667	0	55	1	3	0.0131089	-0.0534304	-0.0550988	-0.195799	0.774598	-0.0151355	0.0285469	-0.122277	-0.15765	-0.289122	-0.300887	-2.38017	-0.218806	-0.21987	-1.27997	0.260522	0.285524	-0.263859	0.458236	-0.137854	0.880247	0.142732	-0.0822022	-0.264629	-0.336278	0.0634475	0.224962	-0.210934	-0.193837	0.321154	-0.320384	0.218565	0.0532695	-0.236034	-0.0583411	0.0735998	0.189603	0.0570497	-0.118207	0.89606	-0.0274323	0.0443041	0.139603	0.751992
endo248	6.96667	0	46	3	4	-0.00832571	-0.834012	-0.258263	-0.170611	-0.640877	-0.613205	-1.33484	0.160425	0.564258	-0.742873	-0.488771	-0.0943174	-0.238634	-0.685518	-0.217548	0.852087	0.00331219	-0.298588	-0.0161483	-0.726875	-1.03304	0.159996	-0.552387	0.444175	-0.0363643	-0.241657	1.36822	-0.428463	-0.166311	-0.149699	2.65467	0.850949	-0.10447	0.0744608	-0.0685913	-0.0892438	-0.996039	-0.107673	-0.426692	0.341881	1.19639	-1.80289	0.0839669	-0.439564
[truncated: 142 more columns]
